# Supplementary material
Source: PubMed Central journal article supplement (PMC3223407)
Supplement: NIHMS36239-supplement-2.pdf [file NIHMS36239-supplement-2.pdf]

## SUPPLEMENTARY INFORMATION

### **Efficient discovery of anti-inflammatory small molecule combinations using evolutionary computing**

Ben G Small<sup>1,8,\$</sup>, Barry W M<sup>c</sup>Coll<sup>6,\$</sup>, Richard Allmendinger<sup>4</sup>, Jürgen Pahle<sup>4</sup>, Gloria López-Castejón<sup>3</sup>, Nancy J Rothwell<sup>3</sup>, Joshua Knowles<sup>4</sup>, Pedro Mendes<sup>2,4,5</sup>, David Brough<sup>3</sup>, Douglas B Kell<sup>2,\*</sup>.

<sup>1</sup>Doctoral Training Centre, Integrative Systems Biology Molecules to Life and

<sup>2</sup>Manchester Centre for Integrative Systems Biology, Manchester Interdisciplinary Biocentre, University of Manchester, 131 Princess Street, Manchester, M1 7DN, United Kingdom.

<sup>3</sup>NeuroSystems, Faculty of Life Sciences, AV Hill Building, University of Manchester, Oxford Road, Manchester, M13 9PT, United Kingdom.

<sup>4</sup>School of Computer Science, University of Manchester, Oxford Road, Manchester, M13 9PL, United Kingdom.

<sup>5</sup>Virginia Bioinformatics Institute, Virginia Polytechnic Institute and State University, Washington Street, MC0477, Blacksburg, Virginia, United States, 24061-0477.

<sup>6</sup>The Roslin Institute, University of Edinburgh, Easter Bush, Midlothian, EH25 9RG, United Kingdom.

<sup>7</sup>School of Chemistry, University of Manchester, 131 Princess St, Manchester M1 7DN, United Kingdom.

<sup>8</sup>School of Chemical Engineering and Analytical Science, University of Manchester, 131 Princess St, Manchester M1 7DN, United Kingdom.

\*Corresponding Author: [dbk@manchester.ac.uk](mailto:dbk@manchester.ac.uk)

<sup>\$</sup>These authors contributed equally to this work

Character count: 32864

|                                                                                                                                                                                                                                                                                                                                            |    |
|--------------------------------------------------------------------------------------------------------------------------------------------------------------------------------------------------------------------------------------------------------------------------------------------------------------------------------------------|----|
| <b>SUPPLEMENTARY METHODS</b>                                                                                                                                                                                                                                                                                                               | 4  |
| SINGLE REAGENT STUDIES .....                                                                                                                                                                                                                                                                                                               | 4  |
| <b>Preparation of primary peritoneal macrophages</b> .....                                                                                                                                                                                                                                                                                 | 4  |
| <b>Preparation of single reagents and lipopolysaccharide (LPS) stimulation of macrophages for assessment of inhibition of IL-1<math>\beta</math> expression</b> .....                                                                                                                                                                      | 5  |
| IBEA DIRECTED EVOLUTIONARY SEARCH OF COMBINATIONS<br>INHIBITING IL-1 $\beta$ EXPRESSION .....                                                                                                                                                                                                                                              | 6  |
| <b>Multi-objective optimization of a chemical library and the implementation of an evolutionary algorithm: IBEA.</b> .....                                                                                                                                                                                                                 | 6  |
| <b>Construction, storage and maintenance of the chemical library</b> .....                                                                                                                                                                                                                                                                 | 8  |
| <b>Production of combinatorial chemical cocktails</b> .....                                                                                                                                                                                                                                                                                | 9  |
| <b>Preparation of J774.A1 macrophages</b> .....                                                                                                                                                                                                                                                                                            | 10 |
| <b>Treatment of J774.A1 macrophages with chemical combinations</b> .....                                                                                                                                                                                                                                                                   | 10 |
| MEASUREMENT OF LDH & IL-1 $\beta$ EXPRESSION .....                                                                                                                                                                                                                                                                                         | 12 |
| <b>Lactate dehydrogenase (LDH) cell viability measurements</b> .....                                                                                                                                                                                                                                                                       | 12 |
| <b>IL-1<math>\beta</math> ELISA</b> .....                                                                                                                                                                                                                                                                                                  | 12 |
| REAGENT REMOVAL / ADDITION AND DATA ANALYSIS .....                                                                                                                                                                                                                                                                                         | 15 |
| <b>Removal and replacement of reagents within the chemical library during the IBEA search</b> .....                                                                                                                                                                                                                                        | 15 |
| <b>Data analysis</b> .....                                                                                                                                                                                                                                                                                                                 | 15 |
| <b>SUPPLEMENTARY RESULTS</b> .....                                                                                                                                                                                                                                                                                                         | 17 |
| THE EFFECT OF SINGLE REAGENTS ON IL-1 $\beta$ EXPRESSION IN PERITONEAL MACROPHAGES .....                                                                                                                                                                                                                                                   | 17 |
| REAGENT & ASSAY QC / VALIDATION .....                                                                                                                                                                                                                                                                                                      | 18 |
| <b>Reagent physicochemical properties</b> .....                                                                                                                                                                                                                                                                                            | 18 |
| <b>Assessment of assay discrimination</b> .....                                                                                                                                                                                                                                                                                            | 19 |
| <b>TABLES</b> .....                                                                                                                                                                                                                                                                                                                        | 20 |
| <b>Supplementary Table 1.</b> Identities and physicochemical properties of reagents populating the chemical libraries used in the assessment of the effects of single reagents and evolutionary (IBEA) directed combinations on LPS stimulated IL-1 $\beta$ expression in peritoneal macrophages and J774 macrophages respectively.. ..... | 23 |
| <b>Supplementary Table 2.</b> Summary of screening parameters for the assay of the evolution directed (IBEA) semi-automated robotic production of chemical combinations inhibiting LPS stimulated J774.A1 macrophage IL-1 $\beta$ expression. .                                                                                            | 26 |

|                                                                                                                                                                                                                                                                                                                                                                                                                                    |    |
|------------------------------------------------------------------------------------------------------------------------------------------------------------------------------------------------------------------------------------------------------------------------------------------------------------------------------------------------------------------------------------------------------------------------------------|----|
| <b>Supplementary Table 3.</b> Characteristics of reagent combinations found from the IBEA directed search that inhibited IL-1 $\beta$ expression in the LPS stimulated J774 macrophages by $\geq$ 95% of positive control responses.....                                                                                                                                                                                           | 27 |
| <b>Supplementary Table 4.</b> Characteristics of reagent combinations found from the IBEA directed search that inhibited IL-1 $\beta$ expression in the LPS stimulated J774 macrophages by $\geq$ 70% of positive control responses.....                                                                                                                                                                                           | 28 |
| <b>FIGURES</b> .....                                                                                                                                                                                                                                                                                                                                                                                                               | 29 |
| <b>Supplementary Figure 1.</b> Reagent dilutions and the percentage of DMSO in the semi-automated production of chemical combinations .....                                                                                                                                                                                                                                                                                        | 29 |
| <b>Supplementary Figure 2.</b> Pharmacological activities of iron chelators, anti / pro-oxidants, MAPK inhibitors, NADPH inhibitors, mitochondrial uncouplers, PI3Kinase inhibitors, NF- $\kappa$ B inhibitors, a statin, calpain inhibitor, COX2 inhibitor, cathepsin B inhibitor and matrix metalloproteinase inhibitor on LPS (1 $\mu$ g / mL) stimulated IL-1 $\beta$ expression in mouse primary peritoneal macrophages. .... | 32 |
| <b>Supplementary Figure 3.</b> Efficacy of chemical combinations with respect to LPS stimulated (1 $\mu$ g / mL) IL-1 $\beta$ expression (upper plot per generation) and LDH release (lower plot per generation) in J774.A1 macrophages for all tested generations (Gen 1 – Gen 11). ....                                                                                                                                          | 38 |
| <b>Supplementary Figure 4.</b> Adaptive dose-matrix search of paired reagent combinations for potential synergy in their inhibition of IL-1 $\beta$ expression.....                                                                                                                                                                                                                                                                | 41 |
| <b>Supplementary Figure 5.</b> Dose-matrix search of the triple reagent combination (SB203580, IKKi and SIH) for potential synergy in its inhibition of IL-1 $\beta$ expression.. ....                                                                                                                                                                                                                                             | 44 |
| <b>Supplementary Figure 6.</b> Calculation of the Z'-Factor statistic retrospectively for the IBEA directed search revealed mean and median values of 0.33 and 0.35 respectively indicating overall that the assay was of an acceptable quality.. ....                                                                                                                                                                             | 45 |
| <b>Supplementary Figure 7.</b> Pseudo-color heat mapping of positive control (LPS (1 $\mu$ g / mL) & DMSO (0.5 % v/v)) responses (% IL-1 $\beta$ expression) to plates of J774.A1 macrophages during the assay of chemical combinations from all generations (Gen 1 – Gen 11).. ....                                                                                                                                               | 46 |
| <b>Supplementary Figure 8.</b> Quantile-Quantile plots of the positive control (LPS & DMSO) responses plotted against theoretical quantiles drawn from a normal distribution confirmed the data were normally distributed.....                                                                                                                                                                                                     | 47 |
| <b>REFERENCES</b> .....                                                                                                                                                                                                                                                                                                                                                                                                            | 48 |
| <b>Supplementary dataset 1</b> .....                                                                                                                                                                                                                                                                                                                                                                                               | 49 |

## **SUPPLEMENTARY METHODS**

All procedures, protocols and methods were carried out under aseptic conditions where deemed necessary.

### **SINGLE REAGENT STUDIES**

#### **Preparation of primary peritoneal macrophages**

Batches (4 per batch) of C57BL/6J male mice (6 - 8 weeks old) were sacrificed by rising carbon dioxide asphyxiation in accordance with schedule 1 of the Animals (Scientific Procedures) Act 1986 as issued by the Home Office, U.K. Slow intra-peritoneal (i.p) injection of pre-warmed (37°C, 8 mL) supplemented Dulbeccos Modified Eagles Medium (DMEM: penicillin and streptomycin (5 µg / mL); and foetal calf serum; 2.5%) was performed into the abdominal area of cadavers.

Peritoneal lavage was carried out and an incision made into the abdominal surface to create a pocket to drain the lavage fluid. Lavage fluid was aspirated using a hypodermic syringe and titrated into a conical tube (15 mL).

A cell count of peritoneal macrophages was conducted using an Improved Neubauer haemocytometer. Macrophages were discriminated (large, circular, phase bright) from other cell types by their morphology. Lavage fluid was centrifuged (250g, 5 min) and the resultant pellet re-suspended in fresh, pre-warmed (37°C) DMEM to a cell concentration of  $5.0 \times 10^5$  cells / mL. Aliquots (200 µL) of cell suspension were subsequently pipetted into 96-well plates (Costar, Corning; 3596) to ensure 100,000 cells / well. Plates of cells were maintained at 37°C in a humidified 95 % O<sub>2</sub> / 5 % CO<sub>2</sub> atmosphere for up to 96 h prior to use.

## **Preparation of single reagents and lipopolysaccharide (LPS) stimulation of macrophages for assessment of inhibition of IL-1 $\beta$ expression**

Stock reagents (Supplementary table 1) were prepared gravimetrically wherever possible, reconstituted to 20 mM in dimethylsulphoxide (DMSO) and serially diluted in log<sub>10</sub> spacings in DMSO down to concentrations of 2  $\mu$ M. The five stock concentrations of reagent were further diluted (1 : 20) into DMEM at 10 X their final concentration (0.1  $\mu$ M - 1 mM). Peritoneal macrophages were exposed to reagents for 30 min prior to LPS stimulation. LPS (Sigma, serotype O26: B6) was diluted from a 1 mg / mL stock (in Phosphate Buffered Saline; PBS). LPS stimulated reactions were terminated after 4 h by addition of homogenising buffer (pH 7.6, 0.02 % NaN) supplemented with Triton X-100 (1 % v/v) and protease inhibitor cocktail (1 % v/v; Calbiochem). Plates were left on ice with regular agitation (to ensure maximal lysis of cells) for 20 min prior to freezing.

## IBEA DIRECTED EVOLUTIONARY SEARCH OF COMBINATIONS

### INHIBITING IL-1 $\beta$ EXPRESSION

#### **Multi-objective optimization of a chemical library and the implementation of an evolutionary algorithm: IBEA.**

A multi-objective optimization problem (MOOP) of generic form can be defined as<sup>1</sup>:

Minimize

$$f(\vec{x}) = (f_1(\vec{x}), f_2(\vec{x}), \dots, f_m(\vec{x})). \quad \text{subject to } \vec{x} \text{ in } X \quad (1)$$

where  $\vec{x} = (x_1, \dots, x_n)$  is a solution vector (here representing a particular combination of reagents) consisting of  $n$  decision variables (i.e. different reagents) for which values must be found and  $X$  the feasible search space. The function  $f: X \rightarrow Y$  represents a mapping from  $X$  into the objective space  $Y$  in  $R^m$ . In general, a MOOP admits no single optimal solution, but rather a set of optimal trade-off solutions exist (also called Pareto-optimal solutions), none of which can be improved in all objectives simultaneously. The aim is to find this solution set, or an approximation of it, called the approximation set.

Our solution vectors represent whether or not to include a particular reagent in a combination or not (the concentration of reagents is fixed), and there are no constraints restricting the search space, hence the space  $X$  is binary or  $\vec{x} \in \{0,1\}^n$  where  $n$  is the number of reagents. A 1 in the vector at position  $j$  means that the  $j$ th reagent is included in the cocktail, a 0 means do not include it. There are three objectives  $f_i$ ,  $i$

=1, 2, 3, to be minimized: IL-1 $\beta$  expression, LDH release and the number of component reagents in a given combination. The aim of the search process is to find reagent combinations that display the best trade-off between these objectives. The field of evolutionary computation has proposed several techniques to solve MOOPs efficiently: after preliminary experimentation, we settled on using the indicator-based EA (IBEA) <sup>2</sup>. The aim of IBEA is find a set of Pareto-optimal solutions that that maximizes some unary performance measure (indicator), which here is the hypervolume of the objective space dominated by the approximation set. Our experimental run of IBEA used the parameters given in Supplementary Table 2 To monitor the progress of the evolutionary search, we use a population average rank measure (Figure 1(C)). This is a nonparametric statistic related to the familiar rank sum tests, Mann-Whitney U and Kruskal-Wallis. All reagent combinations evaluated up to the current generation  $G$  are labeled by the generation in which they were tested. These samples are then ranked by fitness, and, for each generation  $g=1$  to  $G$ , the average of the ranks associated with generation  $g$  is computed. The standard error of these ranks is also shown in the plots. This ranking statistic is computed separately for each of the three objectives, and also for the IBEA indicator (i.e. the three objectives combined).

## **Construction, storage and maintenance of the chemical library**

Reagents were purchased from either Sigma-Aldrich, Tocris, Chembridge Cheng-Du Biopurify Phytochemicals or Merck Chemicals and displayed purities  $\geq 95\%$  as assessed by HPLC or TLC (except SIH;  $\geq 90\%$  assessed by NMR). All compounds were prepared wherever possible gravimetrically and dissolved into DMSO (Supplementary table 1) to a stock concentration of 15 mM. Subsequently, reagents were pipetted into a DMSO resistant, 2.0 mL, 96 deepwell plate (Starlab, E2896-0200) and sealed with a chemically resistant silicone mat (Starlab, E2896 3200) before being stored in an airtight plastic box partially filled with silica gel (Fisher Scientific, S/0761/53) and kept in the dark at room temperature. Stock reagents were transferred periodically to new deep well plates to ensure their pharmacological integrity. A list of reagents and associated information (i.e. physicochemical properties) is given in Supplementary table 1.



## Production of combinatorial chemical cocktails

The generation of poly-combinatorial mixtures of compounds was conducted using a Sciclone ALH 3000 Liquid Handling Workstation under the control of Maestro and HitPicking (v9.0) software (Both Caliper Life Sciences) running on a Windows XP platform on a personal computer. Compound combinations were specified in a 'Hitlist.csv' file; each line specifying the source and destination plate locations on the ALH3000 deck, source and destination well identities (e.g. D1, H12) and the volume (in  $\mu\text{L}$ ) of compound required for transfer from the source to the destination plate. Populations of combinations and vehicle wells were constrained to 50 and 5 wells per plate respectively (with an additional 5 empty wells per plate) and randomly assigned to positions D1 – H12 across the plate to control for position-dependent plate effects (Supplementary figure 7) in accordance with the following equation (2).

$$P_i = (k - n)^{-1} \quad (2)$$

Where  $P_i$  is the probability of the  $i^{\text{th}}$  well position being assigned to one of the following treatments: a combination well, vehicle well or empty well. The total number of  $k$  wells available (i.e. in this instance; 60) and  $n$  the number of wells currently assigned to any treatment. Low volume ( $\geq 5 \mu\text{L}$ ) dispense operations were executed after higher volumes of solvent ( $\geq 90 \mu\text{L}$ ) had already been pipetted to ensure complete dispensing of these low volumes. Combinations were tested at a final concentration of  $3 \mu\text{M}$  (The detail behind the serial dilutions of combinations and the % solvent at each step of the transfer are detailed in Supplementary figure 1).

## **Preparation of J774.A1 macrophages**

J774.A1 macrophages were a kind gift from Prof. Anne-Marie Suprenant to DB's lab, used between passages 12 – 19 and maintained in Dulbeccos modified eagles medium (DMEM) supplemented with high serum (10%, FBS) and penicillin / streptomycin (5  $\mu\text{g} / \text{mL}$ ). Cells were split once 80 % confluency had been attained. Briefly, cells were removed from the base of a T75 flask (Costar) by aspirating existing media and replacing with a pre-warmed (37°C) aliquot (5 mL) of supplemented DMEM prior to using a cell scraper to remove the cell monolayer. After counting the resulting cell suspension was centrifuged (250 g, 5 min), the supernatant discarded and the resultant pellet re-suspended in fresh, pre-warmed (37°C) high serum DMEM to a cell concentration of  $6.5 \times 10^5$  cells / mL. Aliquots (200  $\mu\text{L}$ ) of cell suspension were subsequently pipetted into 96-well plates (Costar, Corning; 3596) and were maintained at 37°C in a humidified 95 %  $\text{O}_2$  / 5 %  $\text{CO}_2$  atmosphere 24 h prior to use.

## **Treatment of J774.A1 macrophages with chemical combinations**

Previously prepared J774.A1 macrophages were treated with either chemical combinations (all component compounds at 3  $\mu\text{M}$ ) or IKK inhibitor (100  $\mu\text{M}$ ) or DMSO (0.5 % v/v) alone for 10 minutes prior to stimulation with LPS (1  $\mu\text{g} / \text{mL}$ ) or PBS (0.1% v/v). Subsequently, cells were maintained at 37°C in a humidified 95 %  $\text{O}_2$  / 5 %  $\text{CO}_2$  atmosphere for 2h. After this time, triplicate wells on each plate were exposed to lysis buffer (20  $\mu\text{L}$ , 1X final concentration, Promega) prior to being returned to the incubator for a remaining ten minutes. Immediately after this time, aliquots (50  $\mu\text{L}$ ) of well supernatants were taken and pipetted into a new 96-well plate

for the measurement of LDH release (see below). Termination of IL-1 $\beta$  expression and lysis of cells was conducted identically to that during the single reagent studies.

## MEASUREMENT OF LDH & IL-1 $\beta$ EXPRESSION

### **Lactate dehydrogenase (LDH) cell viability measurements**

This protocol is adapted from the recommended procedure provided with the CytoTox™ 96 Non-Radioactive Cytotoxicity Assay kit (Promega ; G1780). Well supernatants (50  $\mu$ L aliquots) were pipetted into a fresh 96-well plate prior to the addition of aliquots (50  $\mu$ L) of substrate mix and covering and wrapping of the plate with laboratory film (Parafilm) and foil respectively. The plate was placed on a mini-orbital shaker (50 rpm) for 30 minutes and subsequent addition of stop solution (acetic acid; 50  $\mu$ L) added to each well prior to reading on a plate reader (Biotek Synergy HT; single reagent studies or FLUOstar Omega for combinatorial studies respectively) at an absorbance of 490 nm ( $A_{490\text{nm}}$ ). During single reagent studies, treated wells (LPS and compounds) were compared to control wells (DMSO alone) to assess if there had been a reduction in cell viability. Assessment of treated wells during the combinatorial study was conducted by expressing the  $A_{490\text{nm}}$  of each well to that observed from the mean  $A_{490\text{nm}}$  (of triplicate wells) that had been exposed to lysis buffer and then normalising this value relative to that seen for positive control (quintuplicate) wells.

### **IL-1 $\beta$ ELISA**

This protocol is adapted from the recommended procedure provided with the mouse IL-1 $\beta$ /IL-1F2 DuoSet ELISA development kit (R&D Systems; DY401). Coating of 96-well plates (Maxisorp) with aliquots (50  $\mu$ L) of rat anti-mouse IL-1 $\beta$  capture antibody (cAb; 4.0  $\mu$ g / mL) was conducted and the plates left on a mini orbital shaker

(50 rpm) overnight to ensure an even coating of cAb on all wells prior to the analysis of macrophage lysates.

Plates coated with cAb were aspirated of their cAb solution, washed three times with wash buffer (PBS with 0.05 % v/v Tween 20) after which any remaining well contents were blotted onto an absorbent paper towel until dry. This procedure was followed for all wash steps forthwith. Following this, blocking buffer (PBS and 1 % w/v BSA, Sigma) was aliquoted (50  $\mu$ L) onto all wells, after which plates were covered with laboratory film and placed on a mini orbital shaker (50 rpm) until dilutions for the IL-1 $\beta$  standard curve had been made.

All IL-1 $\beta$  standards were made by reconstitution into lysis buffer (homogenising buffer supplemented with TX-100; 1% v/v). A recombinant mouse IL-1 $\beta$  standard (360 ng / mL, 3  $\mu$ L) was diluted (537  $\mu$ L) to produce a final concentration of 2 ng / mL of a top standard (S1), this was further serially diluted by halving its concentration, this procedure was repeated to produce 9 standards in total, descending to a concentration of 7.8 pg / mL (S9). The blocked plate was subsequently aspirated of the blocking buffer prior to the aliquoting (50  $\mu$ L) of samples and standards onto the plate. Plates were covered with laboratory film and placed on a mini orbital shaker (50 rpm) for 2 hours at room temperature (RT) prior to detection.

Detection of bound IL-1 $\beta$  was carried out by aspirating plate wells of their samples and standards. A biotinylated goat anti-mouse IL-1 $\beta$  detection antibody (dAb; 108  $\mu$ g / mL) was diluted (10  $\mu$ L) in blocking buffer (7.5 mL) to furnish a final concentration of (144 pg / mL) and aliquoted (50  $\mu$ L) onto all wells prior to covering with

laboratory film and placing this plate on a mini orbital shaker (50 rpm) for 1 h. Subsequently, plates were aspirated of their dAb solution, Streptavidin-Horse Radish Peroxidase (Strep-HRP) solution (50  $\mu$ L) was diluted into blocking buffer (10 mL) and aliquoted (50  $\mu$ L) onto wells before the plate was covered with laboratory film and foil and placing on a mini-orbital shaker (50 rpm) for 20 mins. 3, 3', 5, 5' tetramethyl benzidine (TMB) substrate reagents A and B were mixed in equal volumes (2.5 mL : 2.5 mL) in a foil covered tube (15 mL), plates were aspirated of their Strep-HRP solution and aliquots (50  $\mu$ L) of the mixed TMB substrate reagents added to all wells of the plate, covered with laboratory film and foil and left on a mini-orbital shaker for 20 min. Finally, plates were incubated with aliquots (50  $\mu$ L) of dilute sulphuric acid (1M) and the resultant chromophore measured at an absorbance of 450 nm ( $A_{450\text{nm}}$ ) and background subtracted for non-specific fluorescence by measuring at 570 nm ( $A_{570\text{nm}}$ ) on a plate reader (Biotek Synergy HT).

Data analysis was conducted by normalizing absorbance readings to LPS (1  $\mu$ g / mL) and DMSO (0.5 % v/v) positive controls in order to ascertain % inhibitions / potentiations of combinations. In instances where the majority of wells had not exceeded the IL-1 $\beta$  concentration of the top standard (2 ng / mL) measured, a standard curve was constructed and IL-1 $\beta$  concentrations interpolated for sample wells. However, in all cases % changes versus positive control responses are quoted.

## REAGENT REMOVAL / ADDITION AND DATA ANALYSIS

### **Removal and replacement of reagents within the chemical library during the IBEA search**

During the course of the evolutionary search it was necessary to remove and introduce reagents respectively into the chemical library. A simulation study revealed that it is possible to substitute small numbers of reagents (< 5) without undue effects on the course of the evolutionary search<sup>3</sup>. To this end, solutions where these single reagents were present after generation 3 were discarded from the retained elite solutions and a new generation (4) built. Similarly, Epigallocatechin gallate (ECGC) and Simvastatin were added to the chemical library from generation 4. Melatonin, was not introduced until generation 10, in order to compensate for this reagents late arrival into the library it was assigned a higher probability of selection (1 / 5) across all bits present.

### **Data analysis**

Quantile-Quantile plots of the positive control (LPS & DMSO) responses plotted against theoretical quantiles drawn from a normal distribution confirmed the data were normally distributed (Supplementary Figure 8)<sup>4</sup>.

Means and standard errors of the mean (SEM) of data are given as a function of the number of preparations of cells (where primary cells were used). That is 2 - 4 animals were used per preparation or plate of cells (n=1). Measurements were averaged across a minimum of triplicate wells per batch. Significance was assessed using a one-way ANOVA and appropriate post-hoc multiple comparison tests reporting significance at the P<0.05(\*), P<0.01 (\*\*), and P<0.0001 (\*\*\*) levels.

Means and standard error of the mean of data are given as a function of the number of plates of cells per generation tested and were used for making inferences about the relative efficacy of combinations during the evolution directed and dose-matrix adaptive search strategies. A statistical measure of assay quality;  $Z'$ -factor<sup>5</sup> was calculated retrospectively for each generation of combinations tested in accordance with the following equation (3).

$$Z' = 1 - \frac{3(\hat{\sigma}_p + \hat{\sigma}_n)}{|\hat{\mu}_p - \hat{\mu}_n|} \quad (3)$$

Where  $Z'$  is an estimate of the size of the statistical effect,  $\hat{\sigma}_p$  and  $\hat{\sigma}_n$  are the sample standard deviations of the positive and negative controls respectively and  $\hat{\mu}_p$  and  $\hat{\mu}_n$  the sample means for positive and negative controls.



## SUPPLEMENTARY RESULTS

### THE EFFECT OF SINGLE REAGENTS ON IL-1 $\beta$ EXPRESSION IN PERITONEAL MACROPHAGES

We characterized the potency and efficacy of single reagents selected to affect nodes (i.e. signalling proteins and processes respectively in this context) within the TLR4 signalling network and thought important for the expression of IL-1 $\beta$ <sup>6</sup> in LPS-stimulated murine peritoneal macrophages. In total, 24 different reagents were assessed over a 0.01 – 100  $\mu$ M concentration range from the following pharmacological classes: NF- $\kappa$ B, MAPK and PI3kinase inhibitors, pro / anti-oxidants and iron chelators (which indirectly effect antioxidant activity<sup>7,8</sup>). In summary, VK-28,  $\alpha$ -tocopherol succinate, PDTC, SB203580, LY294002, U0126 and IKK inhibitor III were effective inhibitors of IL-1 $\beta$  expression at concentrations between 1 and 100  $\mu$ M (statistically significant at P<0.05 (\*) and P<0.01 (\*\*)) levels by one-way ANOVA and Dunnett's test; see supplementary methods and Supplementary Fig. 2). Our subsequent experiments were designed to discover combinations of these reagents that have inhibitory effects at lower concentrations than when used in isolation. A fixed concentration of 3  $\mu$ M was adopted, that was broadly sub-optimal in inhibiting IL-1 $\beta$  expression by any of these reagents used alone.

## REAGENT & ASSAY QC / VALIDATION

### **Reagent physicochemical properties**

In order to check whether there were common physicochemical parameters that may have influenced the biological activity of combinations within the search we attempted to mine these parameters for all reagents within the chemical library (Supplementary table 1). This was made possible by the recent provision of the publically accessible ChEMBL database of bioactive drug like small molecules (<https://www.ebi.ac.uk/chembl/>) AlogP is a calculated measure of the partition coefficient or lipophilic character of a drug molecule and is a ratio of a molecule's dispersion between organic solvent and aqueous phases. There was no obvious trend in AlogP for the prioritized reagents (i.e. SB203580; 3.88, SIH; 1.29 and Simvastatin; 4.63.) we derived from the IBEA search. However, all shared similar polar surface area (PSA) estimates, higher numbers of hydrogen bond accepting (HBA) moieties versus their hydrogen bond donating (HBD) counterparts and no rule of 5 violations. Unfortunately, owing to SKI-II's absence from the ChEMBL database we were unable to derive parameters for this molecule. Clearly, assessment of physicochemical parameters can form another criterion for proposing reagents to populate chemical libraries.

## **Assessment of assay discrimination**

The ability of the IBEA<sup>2</sup> directed semi-automated robotic assay of chemical combinations generated to inhibit IL-1 $\beta$  expression was scrutinized retrospectively via calculation of the Z'-factor (see data analysis) statistic (Supplementary table 2 and Supplementary figure 6) to determine its ability to locate 'true' efficacious combinations and discriminate against trivial solutions. Although in two instances (at generations 2 and 5) this statistic fell beneath the acceptable range<sup>9</sup> across all other generations the assay was judged to have been of an acceptable or excellent standard and further to this the mean and median values for this statistic were 0.33 and 0.35 respectively, indicating overall that the assay was of an acceptable quality. In summary, this statistic in tandem with the canonical abilities of the IBEA to locate combinations in the presence of 80 % noise in IL-1 $\beta$  expression (see main paper; methods) point to a robust assay for determining novel combinatorial solutions

## **TABLES**

| Name                                  | Supplier                            | Cat#           | Purity<br>(≥ %) | Lot#             | Mwt          | Pharmacological<br>Class*         | chEBI<br>ID   | Parent<br>Mwt | AlogP        | PSA           | HBA      | HBD      | RO5      |
|---------------------------------------|-------------------------------------|----------------|-----------------|------------------|--------------|-----------------------------------|---------------|---------------|--------------|---------------|----------|----------|----------|
| alpha-tocopherol                      | Sigma                               | T3251          | 96.0            | 078K1882         | 430.7        | Antioxidant                       | 103345        | 430.7         | 10.44        | 29.46         | 2        | 1        | 1        |
| EGCG                                  | ChengDu Biopurify<br>Phytochemicals | E07018         | 99.3            | E090715          | 458.4        | Antioxidant                       | 167987        | 458.4         | 3.10         | 197.36        | 11       | 8        | 2        |
| <b>alpha-tocopherol<br/>succinate</b> | <b>Sigma</b>                        | <b>T3126</b>   | <b>98.0</b>     | <b>14H0063</b>   | <b>530.8</b> | <b>Prooxidant</b>                 | <b>229103</b> | <b>530.8</b>  | <b>10.30</b> | <b>72.83</b>  | <b>5</b> | <b>1</b> | <b>2</b> |
| <b>NAC</b>                            | <b>Sigma</b>                        | <b>A9165</b>   | <b>99.0</b>     | <b>80K13495</b>  | <b>163.2</b> | <b>Antioxidant</b>                | <b>120881</b> | <b>163.2</b>  | <b>-0.58</b> | <b>105.20</b> | <b>4</b> | <b>3</b> | <b>0</b> |
| Rotenone                              | Calbiochem                          | 557368         | 98.0            | D00055180        | 394.4        | Antioxidant                       | 102812        | 394.4         | 3.93         | 63.22         | 6        | 0        | 0        |
| <b>TEMPOL</b>                         | <b>Tocris</b>                       | <b>3082</b>    | <b>NA</b>       | <b>1A/85506</b>  | <b>172.2</b> | <b>Antioxidant</b>                | <b>292703</b> | <b>173.3</b>  | <b>0.32</b>  | <b>43.70</b>  | <b>3</b> | <b>2</b> | <b>0</b> |
| <b>Calpain III</b>                    | <b>Calbiochem</b>                   | <b>208722</b>  | <b>95.0</b>     | <b>B29649</b>    | <b>382.5</b> | <b>Enzyme inhibitor</b>           | <b>131775</b> | <b>382.5</b>  | <b>3.53</b>  | <b>84.50</b>  | <b>4</b> | <b>2</b> | <b>0</b> |
| <i>CA-074</i>                         | <i>Sigma</i>                        | <i>C5732</i>   | <i>99.0</i>     | <i>NA</i>        | <i>383.4</i> | <i>Enzyme inhibitor</i>           | <i>560554</i> | <i>383.4</i>  | <i>0.26</i>  | <i>128.34</i> | <i>6</i> | <i>3</i> | <i>0</i> |
| <i>NS-398</i>                         | <i>Calbiochem</i>                   | <i>349254</i>  | <i>98.1</i>     | <i>D00017723</i> | <i>314.4</i> | <i>Enzyme inhibitor</i>           | <i>439249</i> | <i>328.4</i>  | <i>2.68</i>  | <i>100.81</i> | <i>5</i> | <i>0</i> | <i>0</i> |
| <i>GM-6001</i>                        | <i>Calbiochem</i>                   | <i>364205</i>  | <i>98.0</i>     | <i>B69073</i>    | <i>388.5</i> | <i>Enzyme inhibitor</i>           | <i>123466</i> | <i>388.5</i>  | <i>1.62</i>  | <i>123.32</i> | <i>4</i> | <i>5</i> | <i>0</i> |
| Melatonin                             | Sigma                               | M5250          | 99.0            | 098K1117         | 232.3        | Hormone                           | 103012        | 232.3         | 1.56         | 54.12         | 2        | 2        | 0        |
| Desferrioxamine<br>mesylate           | Sigma                               | D9533          | 100.0           | 128K1205         | 656.8        | Iron chelator                     | 330444        | 560.7         | -0.89        | 205.83        | 9        | 6        | 2        |
| <b>SIH</b>                            | <b>Chembridge</b>                   | <b>5109995</b> | <b>90.0</b>     | <b>610065</b>    | <b>225.3</b> | <b>Iron chelator</b>              | <b>434094</b> | <b>241.3</b>  | <b>1.29</b>  | <b>74.58</b>  | <b>4</b> | <b>2</b> | <b>0</b> |
| <b>VK-28</b>                          | <b>Sigma</b>                        | <b>V4264</b>   | <b>97.0</b>     | <b>034K46251</b> | <b>287.4</b> | <b>Iron chelator</b>              | <b>NA</b>     |               |              |               |          |          |          |
| SR11302                               | Tocris                              | 2476           | 99.3            | 1A/89800         | 376.5        | MAPK pathway<br>inhibitor         | NA            |               |              |               |          |          |          |
| <i>PD98059</i>                        | <i>Calbiochem</i>                   | <i>513000</i>  | <i>98.0</i>     | <i>D00048465</i> | <i>267.3</i> | <i>MAPK pathway<br/>inhibitor</i> | <i>150222</i> | <i>267.3</i>  | <i>2.37</i>  | <i>61.55</i>  | <i>4</i> | <i>1</i> | <i>0</i> |
| <b>U0126<br/>monoethanolate</b>       | <b>Calbiochem</b>                   | <b>662005</b>  | <b>98.0</b>     | <b>D00058335</b> | <b>403.5</b> | <b>MAPK pathway<br/>inhibitor</b> | <b>257660</b> | <b>380.5</b>  | <b>2.18</b>  | <b>202.26</b> | <b>8</b> | <b>4</b> | <b>0</b> |
| <b>U0126<br/>monoethanolate</b>       | <b>Tocris</b>                       | <b>1144</b>    | <b>99.4</b>     | <b>4A/93229</b>  | <b>426.5</b> | <b>MAPK pathway<br/>inhibitor</b> | <b>257660</b> |               |              |               |          |          |          |
| <b>U0126<br/>monoethanolate</b>       | <b>Tocris</b>                       | <b>1144</b>    | <b>99.4</b>     | <b>4A/97041</b>  | <b>426.5</b> | <b>MAPK pathway<br/>inhibitor</b> | <b>257660</b> |               |              |               |          |          |          |
| <b>IRAK 1/4 inhibitor</b>             | <b>Calbiochem</b>                   | <b>407601</b>  | <b>99.9</b>     | <b>D00050155</b> | <b>395.4</b> | <b>MAPK pathway<br/>inhibitor</b> | <b>449907</b> | <b>395.4</b>  | <b>2.60</b>  | <b>105.21</b> | <b>6</b> | <b>1</b> | <b>0</b> |
| <b>IRAK 1/4 inhibitor</b>             | <b>Calbiochem</b>                   | <b>407601</b>  | <b>99.9</b>     | <b>D00057214</b> | <b>395.4</b> | <b>MAPK pathway<br/>inhibitor</b> | <b>449907</b> |               |              |               |          |          |          |
| <b>SP600125</b>                       | <b>Calbiochem</b>                   | <b>420119</b>  | <b>98.0</b>     | <b>D00002116</b> | <b>220.2</b> | <b>MAPK pathway<br/>inhibitor</b> | <b>431500</b> | <b>220.2</b>  | <b>2.99</b>  | <b>45.75</b>  | <b>2</b> | <b>1</b> | <b>0</b> |
| <b>SB203580</b>                       | <b>Sigma</b>                        | <b>S8307</b>   | <b>98.0</b>     | <b>029K4619</b>  | <b>377.4</b> | <b>MAPK pathway<br/>inhibitor</b> | <b>100250</b> | <b>377.4</b>  | <b>3.88</b>  | <b>77.84</b>  | <b>3</b> | <b>1</b> | <b>0</b> |

| Name                           | Supplier   | Cat#      | Purity (≥ %) | Lot#               | Mwt   | Pharmacological Class*       | chEBI ID | Parent Mwt | AlogP | PSA    | HBA | HBD | RO5 |
|--------------------------------|------------|-----------|--------------|--------------------|-------|------------------------------|----------|------------|-------|--------|-----|-----|-----|
| SB203580                       | Tocris     | 1202      | 98.7         | 4A/93107           | 377.4 | MAPK pathway inhibitor       | 100250   |            |       |        |     |     |     |
| 2,4-dinitrophenol              | Sigma      | D19,850-1 | 97.0         | 554589-308         | 184.1 | mitochondrial uncoupler      | 110392   | 184.1      | 1.38  | 111.87 | 5   | 1   | 0   |
| CCCP                           | Sigma      | C2759     | 97.0         | 088K1511           | 204.6 | mitochondrial uncoupler      | 474035   | 204.6      | 2.47  | 71.97  | 4   | 1   | 0   |
| FCCP                           | Tocirs     | 0453      | 99.0         | 2A/93205           | 254.2 | mitochondrial uncoupler      | 615435   | 254.2      | 3.92  | 81.20  | 5   | 1   | 0   |
| Apocynin                       | Calbiochem | 178385    | 99.9         | D00055492          | 166.2 | NADPH oxidase inhibitor      | 364242   | 166.2      | 1.31  | 46.53  | 3   | 1   | 0   |
| diphenylene iodonium (DPI)     | Calbiochem | 300260    | 100.0        | D00057661          | 314.6 | NADPH oxidase inhibitor      | 491098   | 279.1      |       |        |     |     |     |
| IKK inhibitor III (BMS-345541) | Calbiochem | 401480    | 96.0         | D00034862          | 255.3 | NF-κB pathway inhibitor      | 513905   | 255.3      | 1.00  | 68.23  | 4   | 2   | 0   |
| IKK inhibitor III (BMS-345541) | Sigma      | B9935     | 98.0         | 077K462Z2          | 291.8 | NF-κB pathway inhibitor      | 513905   |            |       |        |     |     |     |
| PDTC                           | Sigma      | P8765     | 99.0         | 1299391 / 106K1856 | 164.3 | NF-κB pathway inhibitor      | 521017   | 147.3      | 2.48  | 74.13  | 2   | 1   | 0   |
| CAPE                           | Calbiochem | 211200    | 97           | NA                 | 284.3 | tyrosine kinase inhibitor    | 271563   | 284.3      | 3.57  | 66.80  | 4   | 2   | 0   |
| Wortmanin                      | Sigma      | W1628     | 99.0         | 029K4036           | 428.4 | PI3-Kinase inhibitor         | 111985   | 428.4      | 1.71  | 109.11 | 7   | 0   | 0   |
| LY294002.HCl                   | Sigma      | L9908     | 98.0         | 017K4616           | 343.8 | PI3-Kinase inhibitor         | 257152   | 307.3      | 3.34  | 38.76  | 4   | 0   | 0   |
| LY294002.HCl                   | Tocris     | 1130      | 99.4         | 3*A/93270          | 343.8 | PI3-Kinase inhibitor         | 257152   |            |       |        |     |     |     |
| NSC23766                       | Tocris     | 2161      | 99.0         | 2A/93470           | 558.0 | Small GTPase inhibitor       | 525412   | 421.6      | 3.22  | 91.99  | 7   | 3   | 0   |
| Y27632 dihydrochloride         | Tocris     | 1254      | 98.0         | 12A/92215          | 329.3 | Small GTPase inhibitor       | 150239   | 247.3      | 1.11  | 68.01  | 3   | 2   | 0   |
| di-methyl sphingosine          | Calbiochem | 310500    | 98.0         | D00033039          | 327.6 | sphingosine kinase inhibitor | 277963   | 327.6      | 5.79  | 43.70  | 3   | 2   | 1   |
| SKI-II                         | Calbiochem | 567731    | 98.0         | Unknown            | 339.2 | sphingosine kinase inhibitor | NA       |            |       |        |     |     |     |
| SKI-II                         | Sigma      | S5696     | 99.0         | 077K46181          | 302.8 | sphingosine kinase inhibitor | NA       |            |       |        |     |     |     |
| Mevastatin                     | Sigma      | M2537     | 95.0         | 0001423869         | 390.5 | Statin                       | 184814   | 390.5      | 3.97  | 72.83  | 5   | 1   | 0   |
| Simvastatin                    | Calbiochem | 1965      | 98.2         | 2B/96951           | 418.6 | Statin                       | 238562   | 418.6      | 4.63  | 72.83  | 5   | 1   | 0   |
| Genistein                      | Sigma      | G6649     | 98.0         | 018K1203           | 270.2 | tyrosine kinase inhibitor    | 102658   | 270.2      | 2.14  | 86.99  | 5   | 3   | 0   |
| DMSO                           | Sigma      | D8418     | 100.0        | 108K01864          | 78.1  | Vehicle                      | 110009   | 78.1       | -0.32 | 36.28  | 1   | 0   | 0   |
| TPEN                           | Sigma      | P4413     | 99.0         | 078K1429           | 424.6 | Zinc chelator                | NA       |            |       |        |     |     |     |

**Supplementary Table 1.** Identities and physicochemical properties of reagents populating the chemical libraries used in the assessment of the effects of single reagents and evolutionary (IBEA) directed combinations on LPS stimulated IL-1 $\beta$  expression in peritoneal macrophages and J774 macrophages respectively. Reagents highlighted in bold were utilized in both single reagent and combination studies. Those reagents highlighted in red and italicised (i.e. CA-074, NS-398, GM-6001, PD98059 and CAPE) were not pursued during the course of the evolution driven search for combinations inhibiting IL-1 $\beta$  expression. Discrepancies between ‘Molecular Weight’ (supplied by the manufacturer) and ‘Parent Molecular Weight’ (provided courtesy of the ChEMBL database) fields are attributable to the salt form of the compounds (i.e. NS-398, Desferrioxamine Mesylate, SIH, U0126, diphenylene iodonium, LY294002 hydrochloride, IKK inhibitor III, NSC23766, Y27632 dihydrochloride). \* Pharmacological class is an arbitrary assignation defining biological targets / processes where we assume these molecules will exert their effects in the TLR4 stimulated macrophage IL-1 $\beta$  signalling network. Cat#; catalogue number, Mwt; Molecular weight, ChEBI ID; Chemical Entity of Biological Interest (database) Identity, AlogP; calculated partition coefficient, PSA; polar surface area, HBA; number of hydrogen bond accepting moieties, HBD; number of hydrogen bond donating moieties, RO5; number of rule of five violations, NA; Not Identified.

| Category | Parameter                           | Description                                                                                                                                                                                                                                                                                                                                                                                                                                                                                                                                                                                                                                                        |
|----------|-------------------------------------|--------------------------------------------------------------------------------------------------------------------------------------------------------------------------------------------------------------------------------------------------------------------------------------------------------------------------------------------------------------------------------------------------------------------------------------------------------------------------------------------------------------------------------------------------------------------------------------------------------------------------------------------------------------------|
| Assay    | Type of assay                       | <i>In vitro</i> , evolution directed (IBEA) semi-automated robotic assay utilizing chemical combinations to inhibit LPS stimulated J774.A1 macrophage IL-1 $\beta$ expression.                                                                                                                                                                                                                                                                                                                                                                                                                                                                                     |
|          | Target                              | IL-1 $\beta$ , UniProt ( <a href="#">IL1B_MOUSE; P10749</a> )                                                                                                                                                                                                                                                                                                                                                                                                                                                                                                                                                                                                      |
|          | Primary measurement                 | IL-1 $\beta$ expression measured via ELISA                                                                                                                                                                                                                                                                                                                                                                                                                                                                                                                                                                                                                         |
|          | Key reagents                        | All antibodies and proteins were obtained from R&D systems.<br><br>Capture Antibody (Part 840134, 1 vial) - 720 $\mu$ g / mL of rat anti-mouse IL-1 $\beta$ when reconstituted with 1.0 mL of PBS.<br><br>Detection Antibody (Part 840135, 1 vial) - 108 $\mu$ g / mL of biotinylated goat anti-mouse IL-1 $\beta$ when reconstituted with 1.0 mL of blocking buffer (see supplementary methods for recipe).<br><br>Standard (Part 840136, 1 vial) - 360 ng / mL of recombinant mouse IL-1 $\beta$ when reconstituted with 0.5 mL of blocking buffer.<br><br>Streptavidin-HRP (Part 890803, 1 vial) - 1.0 mL of streptavidin conjugated to horseradish peroxidase. |
|          | Assay protocol                      | This protocol is adapted from the recommended procedure provided with the mouse IL-1 $\beta$ /IL-1F2 DuoSet ELISA development kit (R&D Systems; DY401)                                                                                                                                                                                                                                                                                                                                                                                                                                                                                                             |
|          | Additional comments                 | see supplementary methods                                                                                                                                                                                                                                                                                                                                                                                                                                                                                                                                                                                                                                          |
| Library  | Library size                        | 33 reagents in total, never exceeding 30 reagents during the course of the iterative, IBEA directed search.                                                                                                                                                                                                                                                                                                                                                                                                                                                                                                                                                        |
|          | Library composition                 | Small molecule reagents: drug like inhibitor molecules of biological targets (e.g. NF- $\kappa$ B and MAPK inhibitors) and processes (e.g. redox reactions – antioxidants and iron chelators).                                                                                                                                                                                                                                                                                                                                                                                                                                                                     |
|          | Source                              | Sigma-Aldrich, Tocris, Chembridge Cheng-Du Biopurify Phytochemicals or Merck Chemicals                                                                                                                                                                                                                                                                                                                                                                                                                                                                                                                                                                             |
|          | Additional comments                 | see supplementary table 1                                                                                                                                                                                                                                                                                                                                                                                                                                                                                                                                                                                                                                          |
| Screen   | Format                              | 96-well plates (Nunc; Maxisorp)                                                                                                                                                                                                                                                                                                                                                                                                                                                                                                                                                                                                                                    |
|          | Concentration(s) tested             | All reagents evaluated either alone or in combinations at 3 $\mu$ M.                                                                                                                                                                                                                                                                                                                                                                                                                                                                                                                                                                                               |
|          | Plate controls                      | Randomized quintuplicate positive control wells (LPS, 1 $\mu$ g / mL & DMSO, 0.5 % v/v) and negative control (C11) well (IKK inhibitor III, 100 $\mu$ M)                                                                                                                                                                                                                                                                                                                                                                                                                                                                                                           |
|          | Reagent/ compound dispensing system | Sciclone ALH3000 (Caliper Life Sciences)                                                                                                                                                                                                                                                                                                                                                                                                                                                                                                                                                                                                                           |
|          | Detection instrument and software   | BioTek Synergy HT plate reader used for the measurement of the IL-1 $\beta$ ELISA absorbance ( $A_{450nm}$ – $A_{570nm}$ ) readings under the control of Gen 5 software.<br><br>FLUOstar Omega (BMG LabTech) plate reader was used for the measurement of LDH reaction absorbance ( $A_{490nm}$ ).                                                                                                                                                                                                                                                                                                                                                                 |
|          | Assay validation/QC                 | The median Z' factor for the assay was 0.35                                                                                                                                                                                                                                                                                                                                                                                                                                                                                                                                                                                                                        |



|                         |                                          |                                                                                                                                                                                                                                                                                                                                                                                                                                                                                                                                                         |
|-------------------------|------------------------------------------|---------------------------------------------------------------------------------------------------------------------------------------------------------------------------------------------------------------------------------------------------------------------------------------------------------------------------------------------------------------------------------------------------------------------------------------------------------------------------------------------------------------------------------------------------------|
|                         |                                          | indicating the assay was acceptable.                                                                                                                                                                                                                                                                                                                                                                                                                                                                                                                    |
|                         |                                          | Plate edge effects were assessed by the heat mapping of randomized positive control wells (n = 3 minimum / data point) (see supplementary figure 7).                                                                                                                                                                                                                                                                                                                                                                                                    |
|                         | Correction factors                       | NA                                                                                                                                                                                                                                                                                                                                                                                                                                                                                                                                                      |
|                         | Normalization                            | J774.A1 cell IL-1 $\beta$ expression data was expressed as a percentage of the measured IL-1 $\beta$ concentration (pg / mL) interpolated from the standard curve for a given well / plate to the mean IL-1 $\beta$ concentration (pg / mL) derived from five positive control wells for that plate. Populations of generations were assayed in plates in triplicate.                                                                                                                                                                                   |
|                         | Additional comments                      | See supplementary information; supplementary figure 6.                                                                                                                                                                                                                                                                                                                                                                                                                                                                                                  |
| Post-HTS analysis       | Hit criteria                             | Objective evaluation of all combinations across all generations (i.e. generation 1 – 11) was performed by measuring (post-hoc) the fitness contribution of reagents from combinations and deriving a ranked list.                                                                                                                                                                                                                                                                                                                                       |
|                         | Hit rate                                 | Reagents were selected from top five ranked reagents when assessed either singularly or as double or triple combinations in either the presence or absence of the dominant solution (i.e. SB203580).                                                                                                                                                                                                                                                                                                                                                    |
|                         | Additional assay(s)                      | Concentration-dependent adaptive dose matrix search of paired combinations from five selected reagents.                                                                                                                                                                                                                                                                                                                                                                                                                                                 |
|                         | Confirmation of hit purity and structure | Manufacturer specification and certificates of analysis were used as confirmatory evidence of hit purity and structure.                                                                                                                                                                                                                                                                                                                                                                                                                                 |
|                         | Additional comments                      | See supplementary information, particularly supplementary table 1 (confirming reagent identities & physicochemical properties) and supplementary figure 7 detailing the variation in positive control responses across the plate.                                                                                                                                                                                                                                                                                                                       |
| IBEA parameter settings | Population size                          | 50 reagent combinations were generated by IBEA at each generation.                                                                                                                                                                                                                                                                                                                                                                                                                                                                                      |
|                         | Parental selection                       | Solutions (parents) for reproduction were selected using binary tournament selection with replacement.                                                                                                                                                                                                                                                                                                                                                                                                                                                  |
|                         | Crossover probability                    | Offspring were generated by applying uniform crossover with a probability of 0.7 to the selected parents. In situations where crossover is not applied, offspring are simply copied versions of the parents.                                                                                                                                                                                                                                                                                                                                            |
|                         | Per-bit mutation probability             | Each decision variable (reagent) of an offspring (reagent combination) was mutated or flipped independently with a probability of 1/33 (i.e. on average one solution variable was flipped).                                                                                                                                                                                                                                                                                                                                                             |
|                         | Additional comments                      | Recall that the initial population was generated at random such that each reagent combination contains on average 3 reagents; i.e. any reagent of the library was included with a probability of 1/33 into a reagent combination. A more detailed explanation of IBEA including a pseudocode of the algorithm can be found in Reference 8. We use the adaptive version of IBEA from that reference. The value of the scaling parameter, $\kappa$ , was 0.05, and the hypervolume reference point used was (2,2,2), as in the original source reference. |

**Supplementary Table 2.** Summary of the screening and EA parameter settings for the assay of the evolution directed (IBEA) semi-automated robotic production of chemical combinations inhibiting LPS stimulated J774.A1 macrophage IL-1 $\beta$  expression.

| <b>Generation</b> | <b>Number of combinations per generation showing <math>\geq 95\%</math> inhibition of IL-1<math>\beta</math> expression</b> | <b>Mean number of component reagents per generation (rounded to integer)</b> | <b>Mean fractional LDH release of combinations per generation</b> |
|-------------------|-----------------------------------------------------------------------------------------------------------------------------|------------------------------------------------------------------------------|-------------------------------------------------------------------|
| 2                 | 1                                                                                                                           | 3                                                                            | 0.96                                                              |
| 4                 | 4                                                                                                                           | 5                                                                            | 1.01                                                              |
| 6                 | 8                                                                                                                           | 5                                                                            | 1.08                                                              |
| 7                 | 3                                                                                                                           | 4                                                                            | 0.99                                                              |
| 8                 | 1                                                                                                                           | 4                                                                            | 1.00                                                              |
| 9                 | 27                                                                                                                          | 3                                                                            | 1.05                                                              |
| 10                | 3                                                                                                                           | 5                                                                            | 1.00                                                              |
| 11                | 4                                                                                                                           | 4                                                                            | 0.97                                                              |

| <b>Number of reagents per combination</b> | <b>Mean inhibition of IL-1<math>\beta</math> expression for combinations where inhibition was already <math>\geq 95\%</math> of the positive control response</b> | <b>Number of combinations</b> |
|-------------------------------------------|-------------------------------------------------------------------------------------------------------------------------------------------------------------------|-------------------------------|
| 7                                         | 98.51                                                                                                                                                             | 4                             |
| 6                                         | 99.10                                                                                                                                                             | 2                             |
| 5                                         | 99.09                                                                                                                                                             | 8                             |
| 4                                         | 99.20                                                                                                                                                             | 16                            |
| 3                                         | 98.93                                                                                                                                                             | 13                            |
| 2                                         | 100.00                                                                                                                                                            | 5                             |

**Supplementary Table 3.** Characteristics of reagent combinations found from the IBEA directed search that inhibited IL-1 $\beta$  expression in the LPS stimulated J774 macrophages by  $\geq 95\%$  of positive control responses. Overall, successive generations of reagent combination yielded decreases in the number of component reagents and fractional LDH release (Top). Despite decreases in component reagent number the search still located five very efficacious dual combinations (Bottom).

| Generation | Number of combinations per generation showing $\geq 70\%$ inhibition of IL-1 $\beta$ expression | Mean number of component reagents per generation (rounded to integer) | Mean fractional LDH release of combinations per generation |
|------------|-------------------------------------------------------------------------------------------------|-----------------------------------------------------------------------|------------------------------------------------------------|
| 1          | 8                                                                                               | 4                                                                     | 1.06                                                       |
| 2          | 5                                                                                               | 5                                                                     | 1.03                                                       |
| 3          | 32                                                                                              | 4                                                                     | 1.02                                                       |
| 4          | 12                                                                                              | 5                                                                     | 1.02                                                       |
| 5          | 18                                                                                              | 4                                                                     | 1.01                                                       |
| 6          | 29                                                                                              | 4                                                                     | 1.04                                                       |
| 7          | 27                                                                                              | 4                                                                     | 1.06                                                       |
| 8          | 24                                                                                              | 4                                                                     | 1.04                                                       |
| 9          | 28                                                                                              | 4                                                                     | 1.05                                                       |
| 10         | 32                                                                                              | 3                                                                     | 1.01                                                       |
| 11         | 18                                                                                              | 3                                                                     | 0.98                                                       |

| Number of reagents per combination | Mean inhibition of IL-1 $\beta$ expression for combinations where inhibition was already $\geq 70\%$ of the positive control response | Number of combinations |
|------------------------------------|---------------------------------------------------------------------------------------------------------------------------------------|------------------------|
| 8                                  | 90.52                                                                                                                                 | 1                      |
| 7                                  | 91.51                                                                                                                                 | 10                     |
| 6                                  | 89.92                                                                                                                                 | 18                     |
| 5                                  | 91.93                                                                                                                                 | 35                     |
| 4                                  | 92.29                                                                                                                                 | 57                     |
| 3                                  | 90.20                                                                                                                                 | 58                     |
| 2                                  | 87.88                                                                                                                                 | 34                     |

**Supplementary Table 4.** Characteristics of reagent combinations found from the IBEA directed search that inhibited IL-1 $\beta$  expression in the LPS stimulated J774 macrophages by  $\geq 70\%$  of positive control responses. Overall, successive generations of reagent combination yielded decreases in the number of component reagents and fractional LDH release (Top). Similarly, despite decreases in component reagent number the search still located thirty four dual combinations (Bottom).

## FIGURES

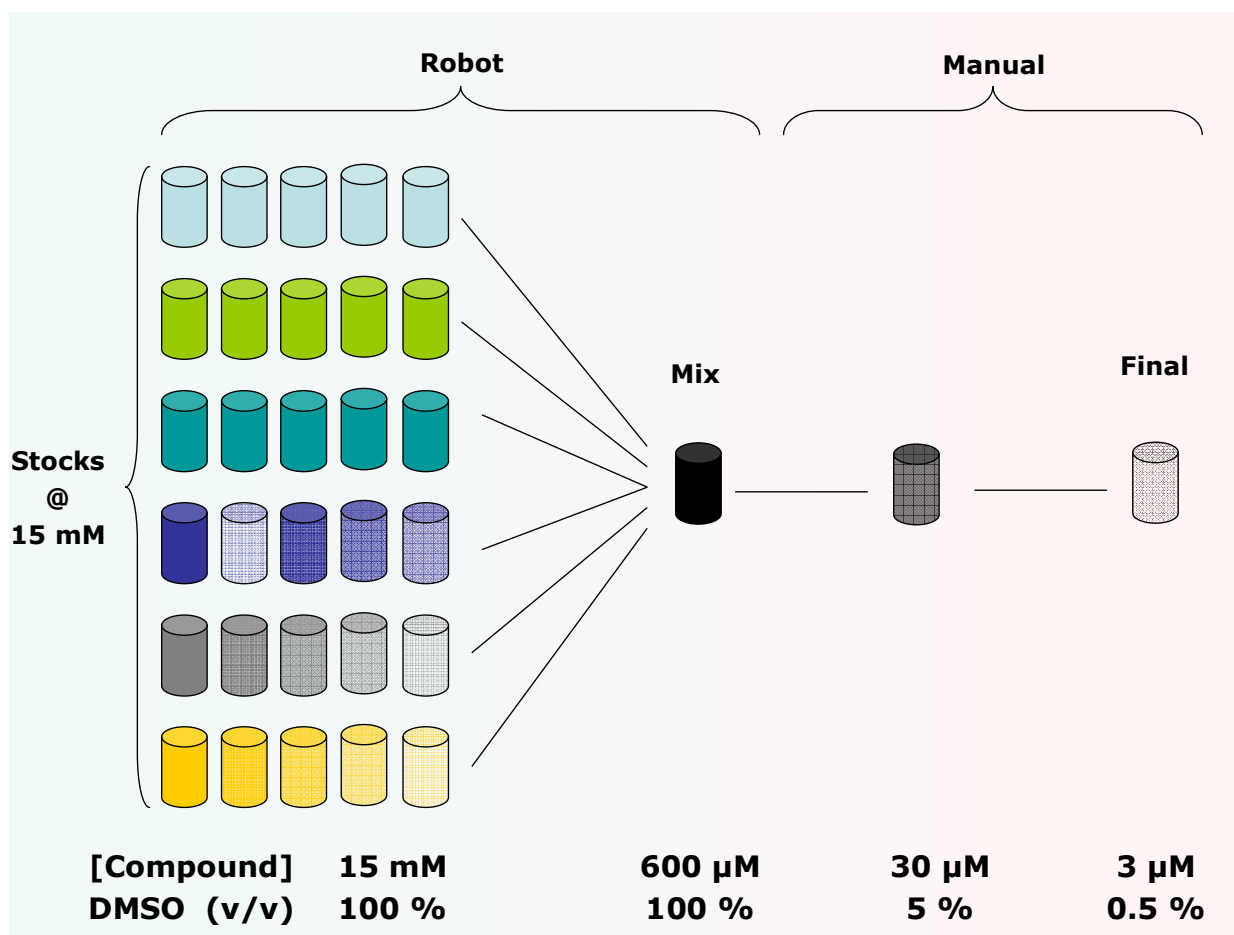

**Supplementary Figure 1.** Reagent dilutions and the percentage of DMSO in the semi-automated production of chemical combinations

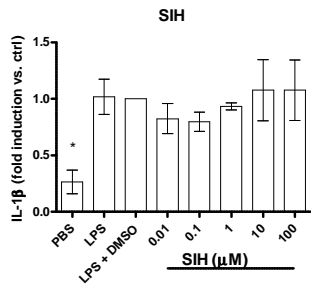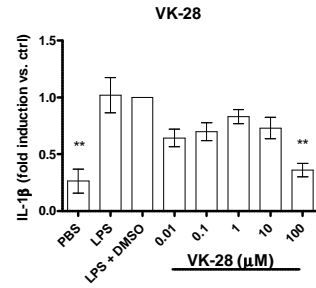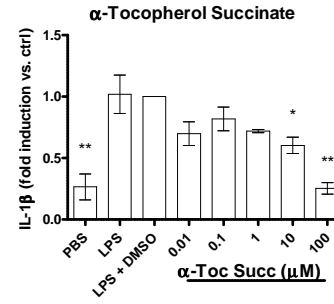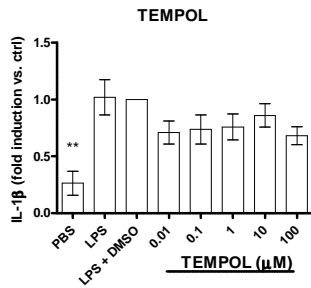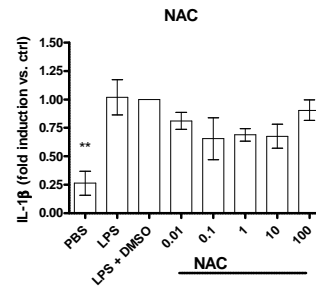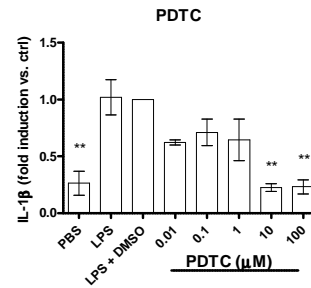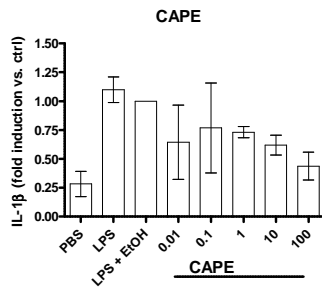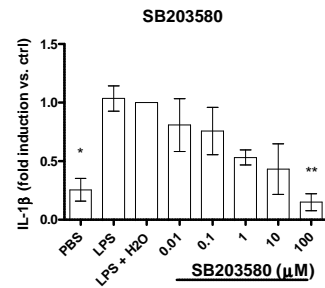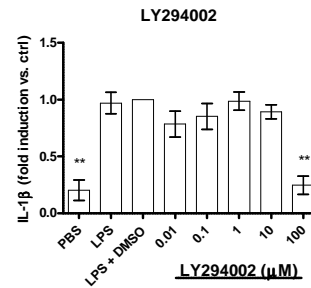

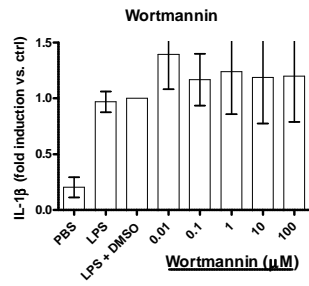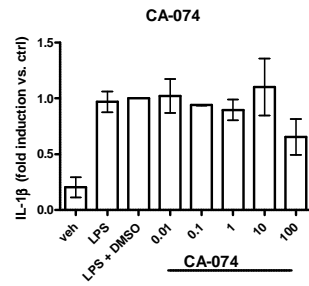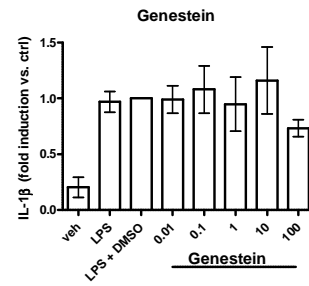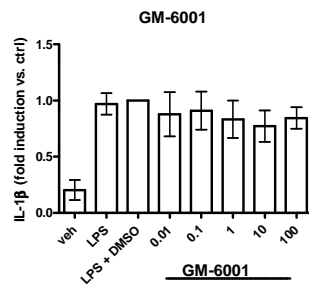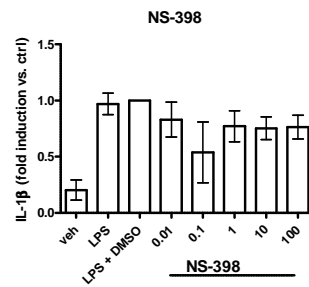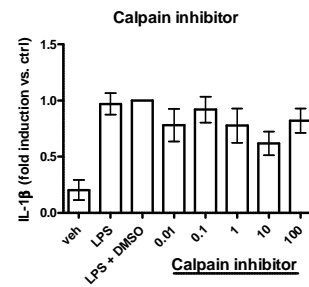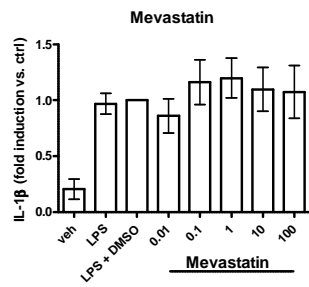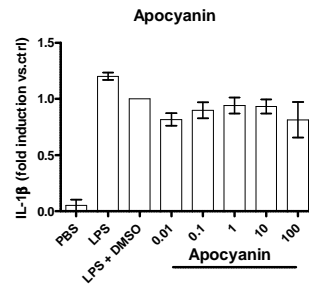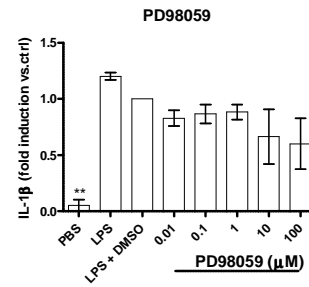

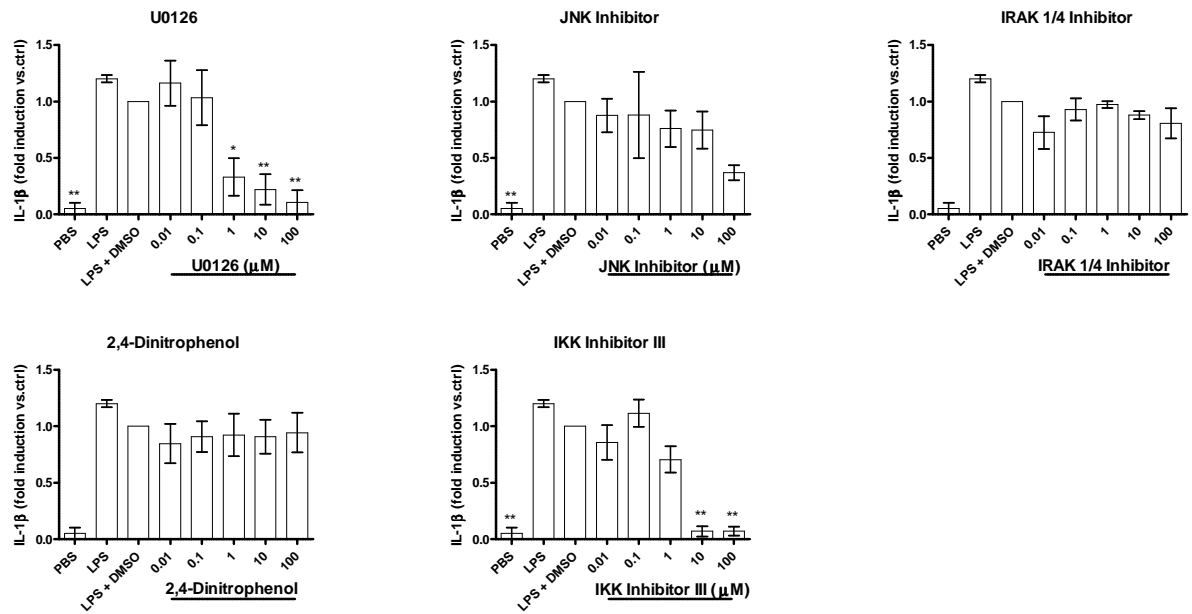

**Supplementary Figure 2.** Pharmacological activities of selected reagents on LPS (1 $\mu$ g / mL) stimulated IL-1 $\beta$  expression in mouse primary peritoneal macrophages. Comparison of different treatments to positive control (LPS and DMSO) was assessed by means of a one-way ANOVA and a post-hoc Dunnett's multiple comparison test reporting significance at the P<0.05 (\*) and P<0.01 (\*\*) levels. Data are expressed as mean  $\pm$  SEM (n=3 preparations).



### Generation 1

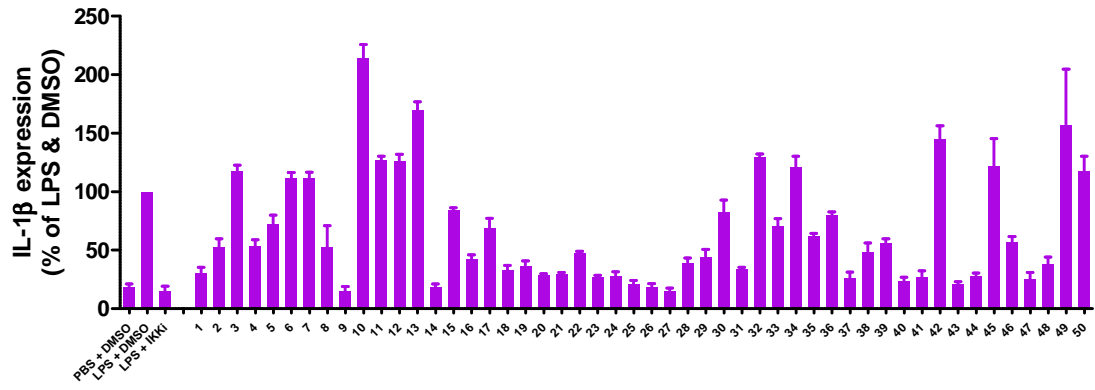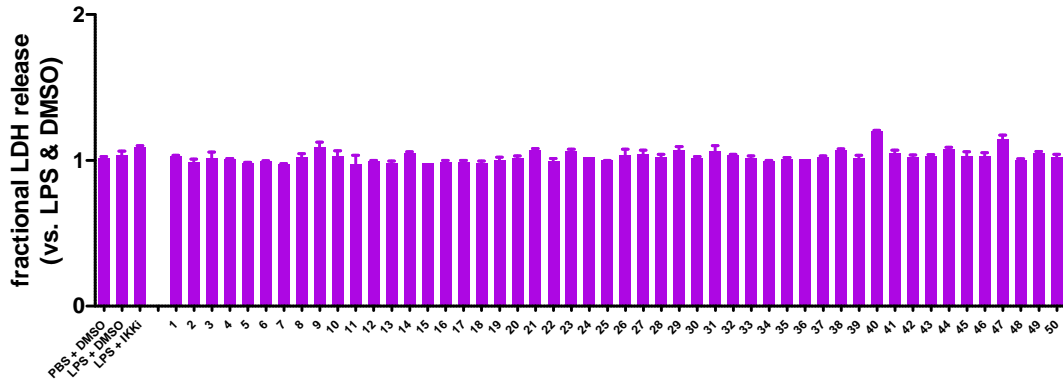

Treatment / Combination

### Generation 2

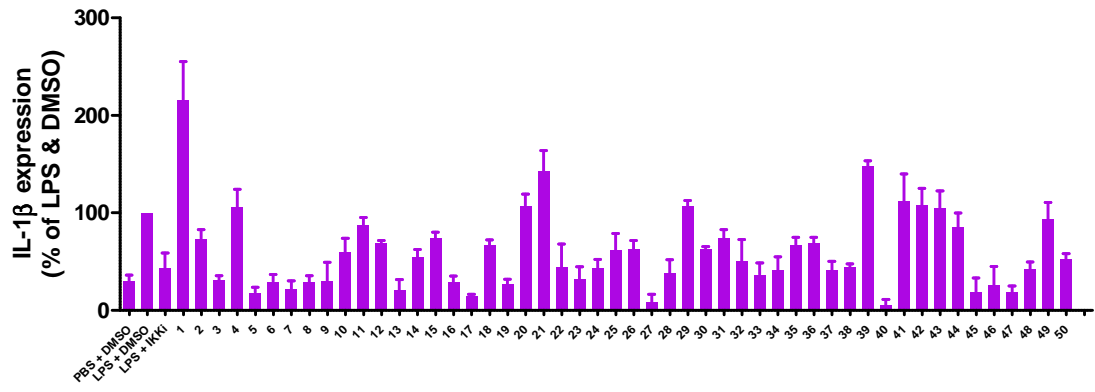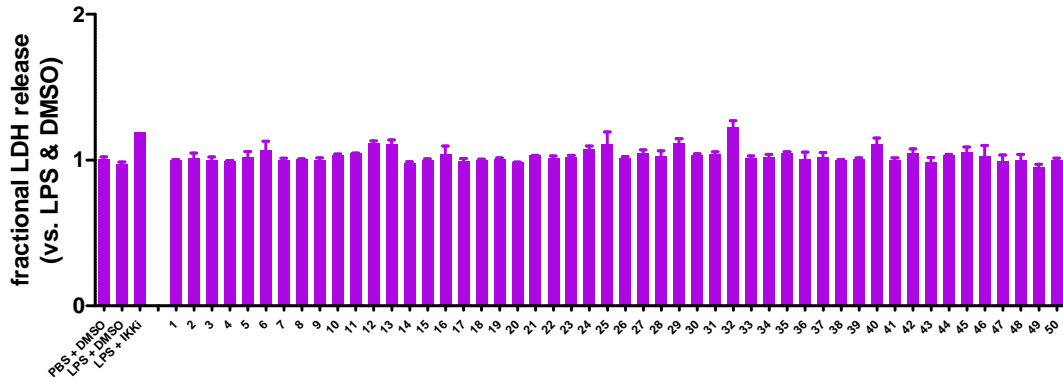

Treatment / Combination

### Generation 3

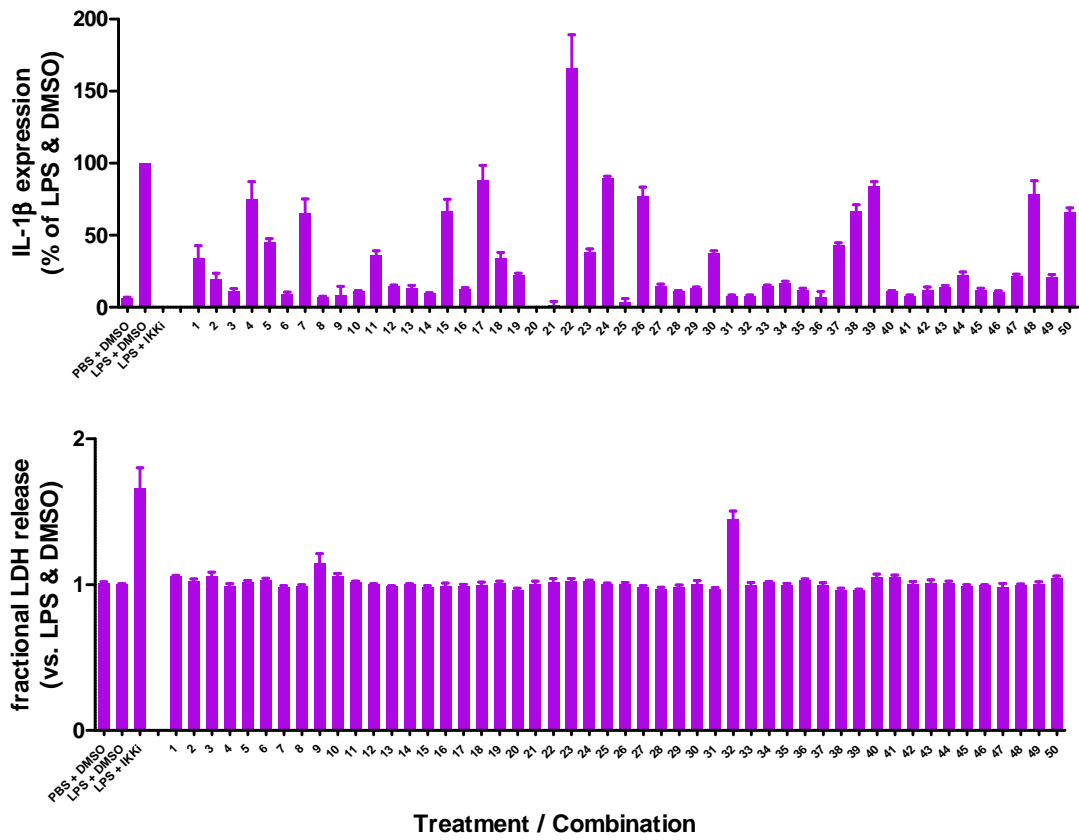

### Generation 4

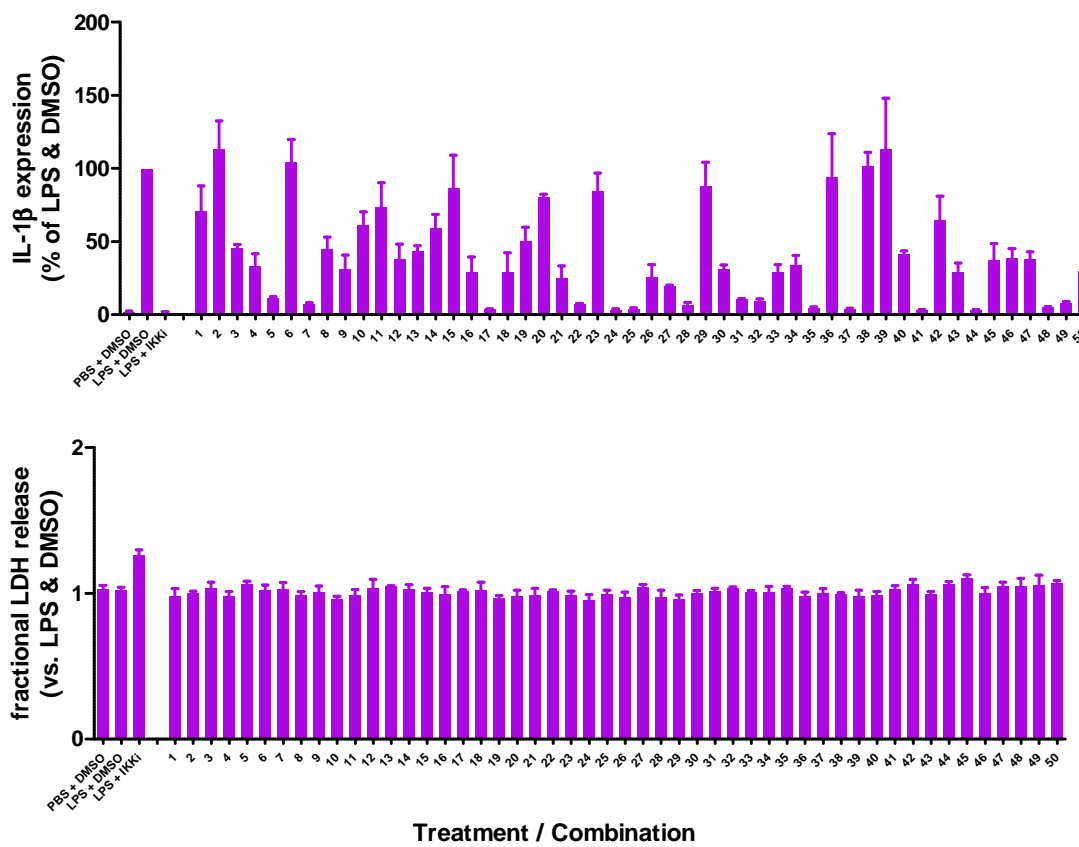

### Generation 5

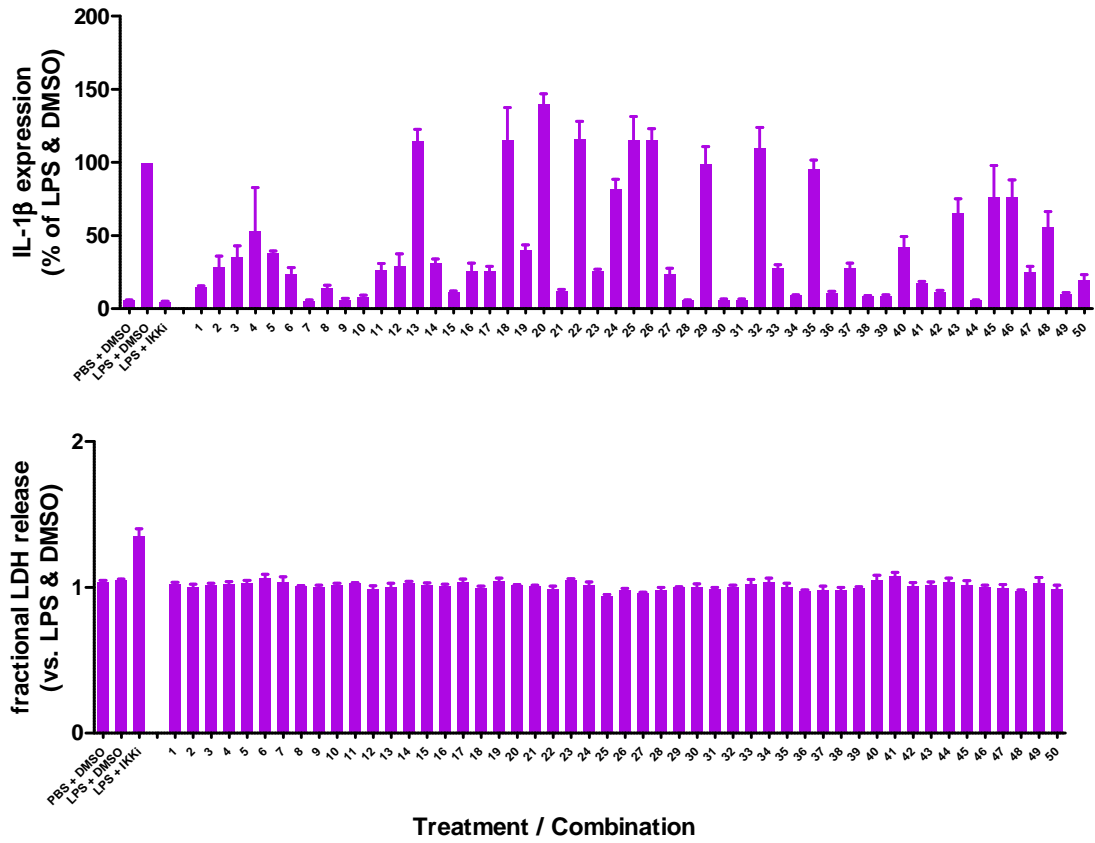

### Generation 6

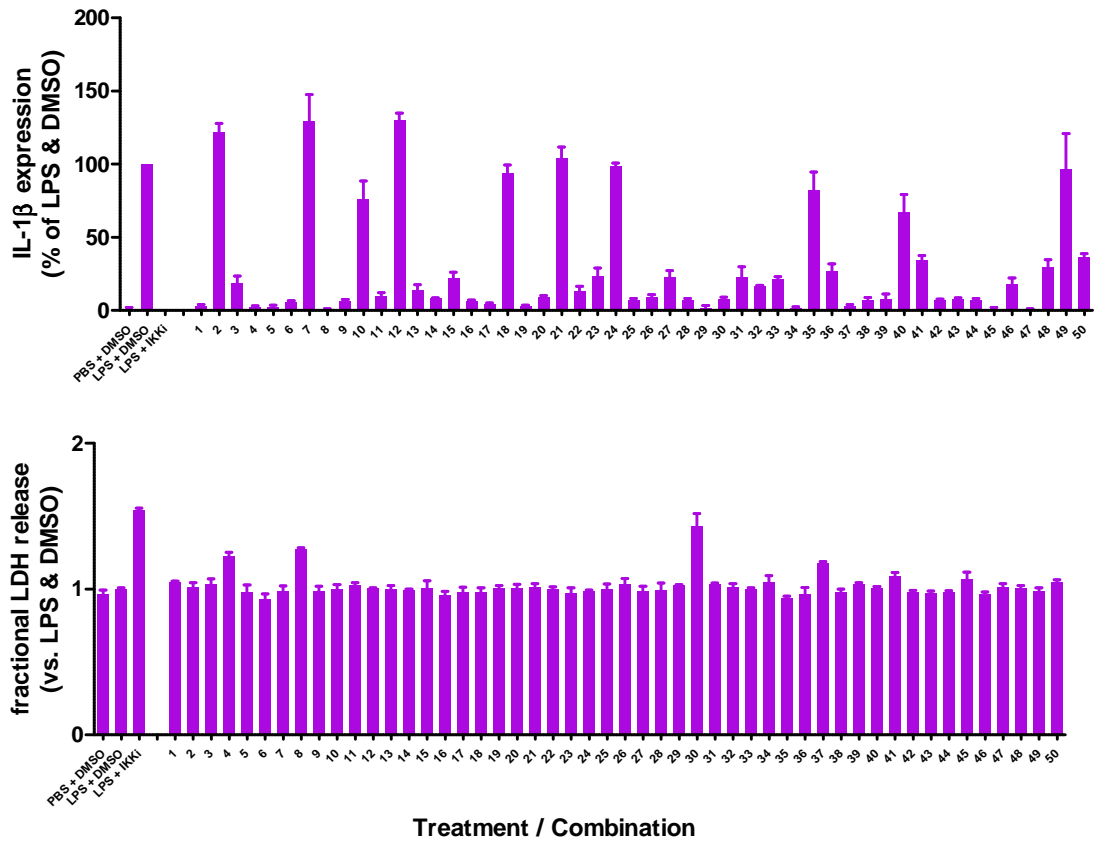

### Generation 7

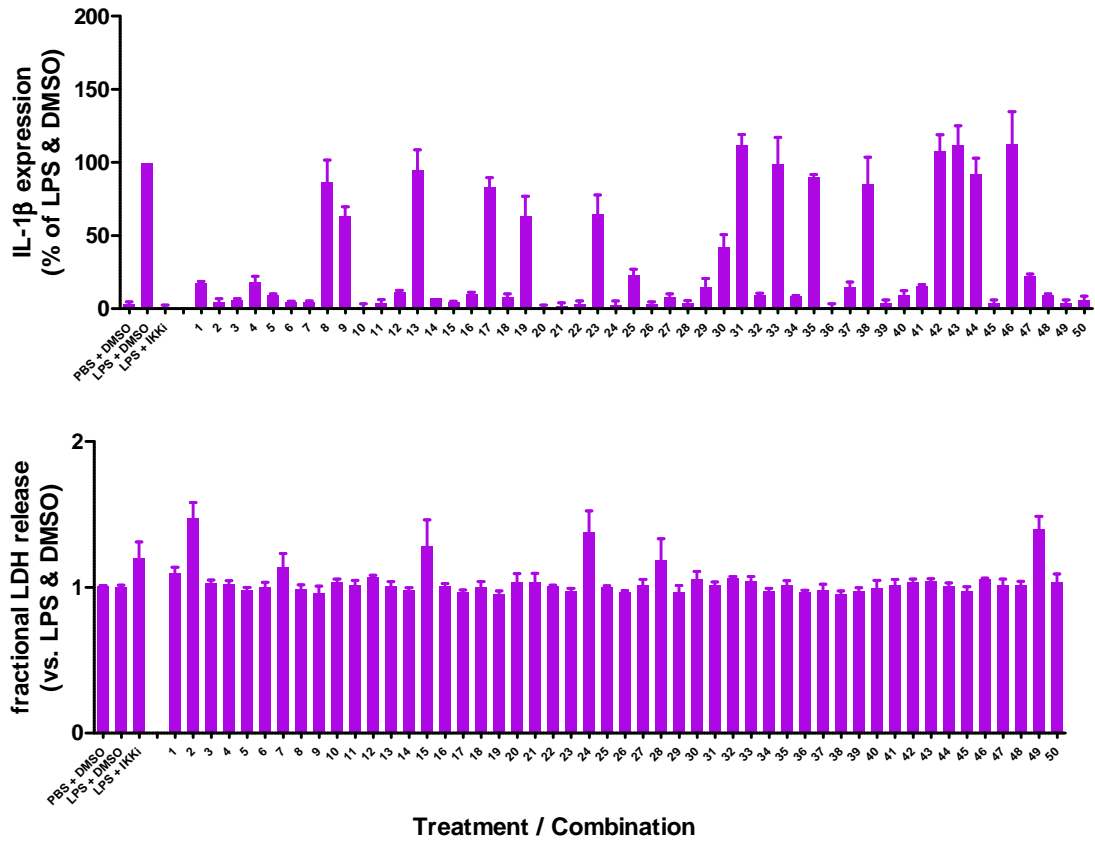

### Generation 8

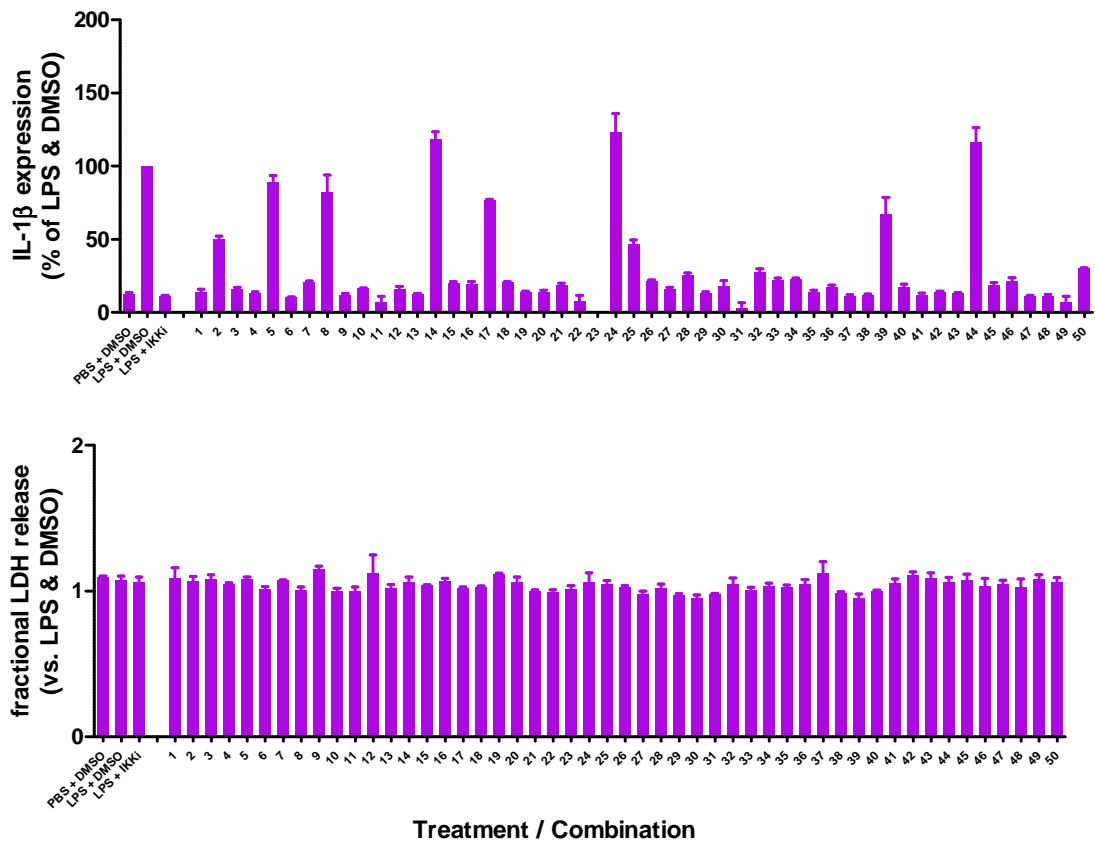

### Generation 9

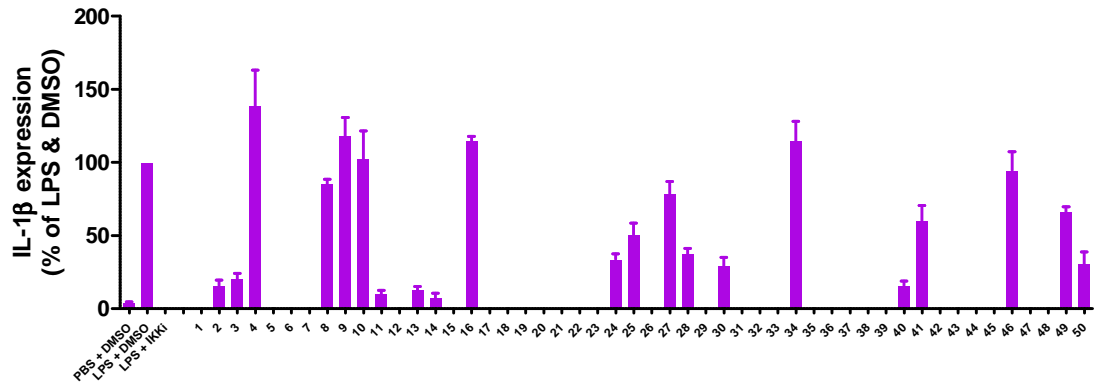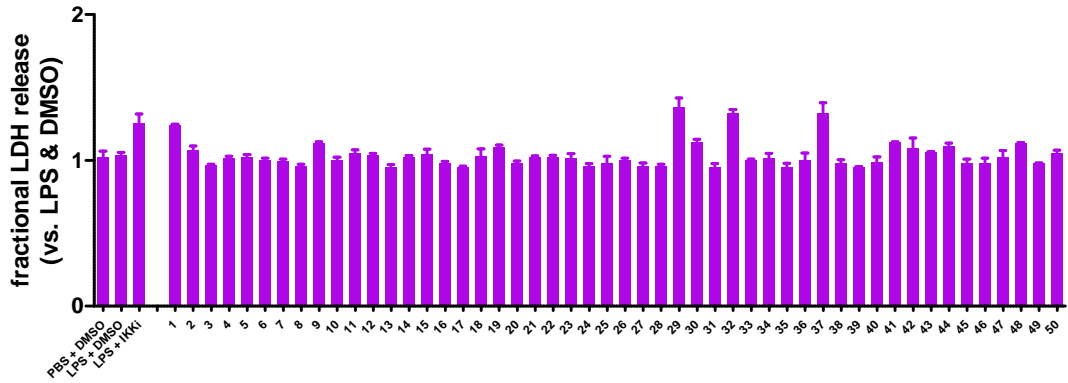

Treatment / Combination

### Generation 10

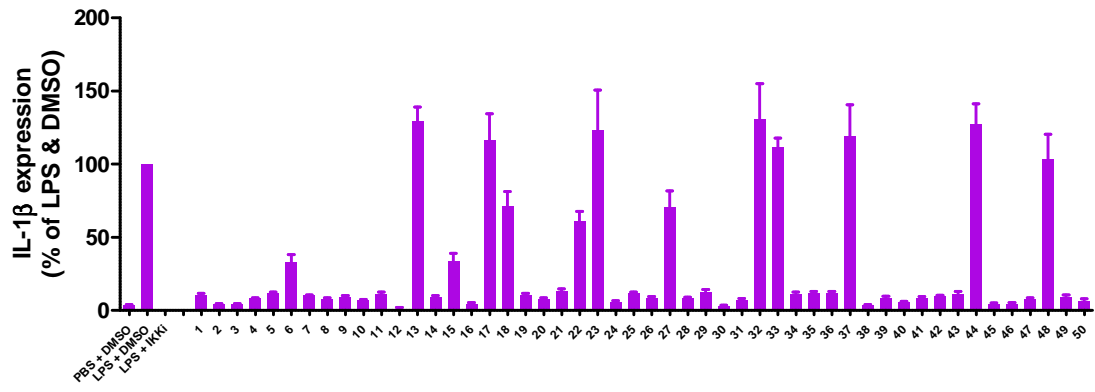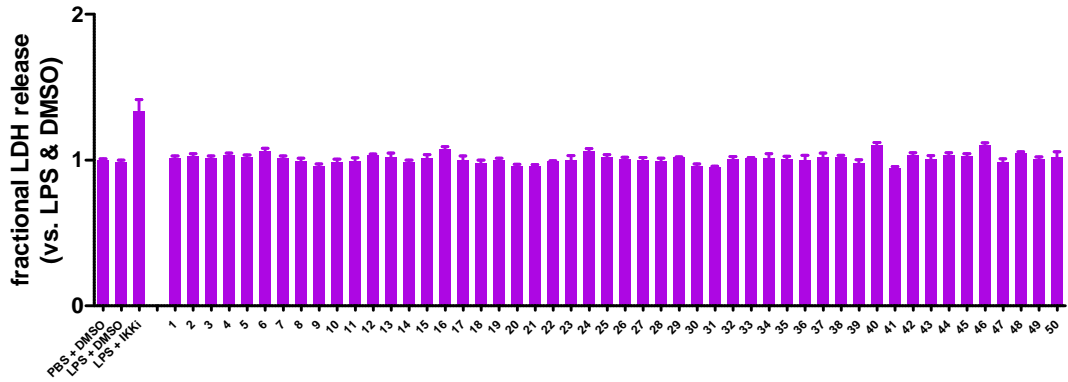

Treatment / Combination

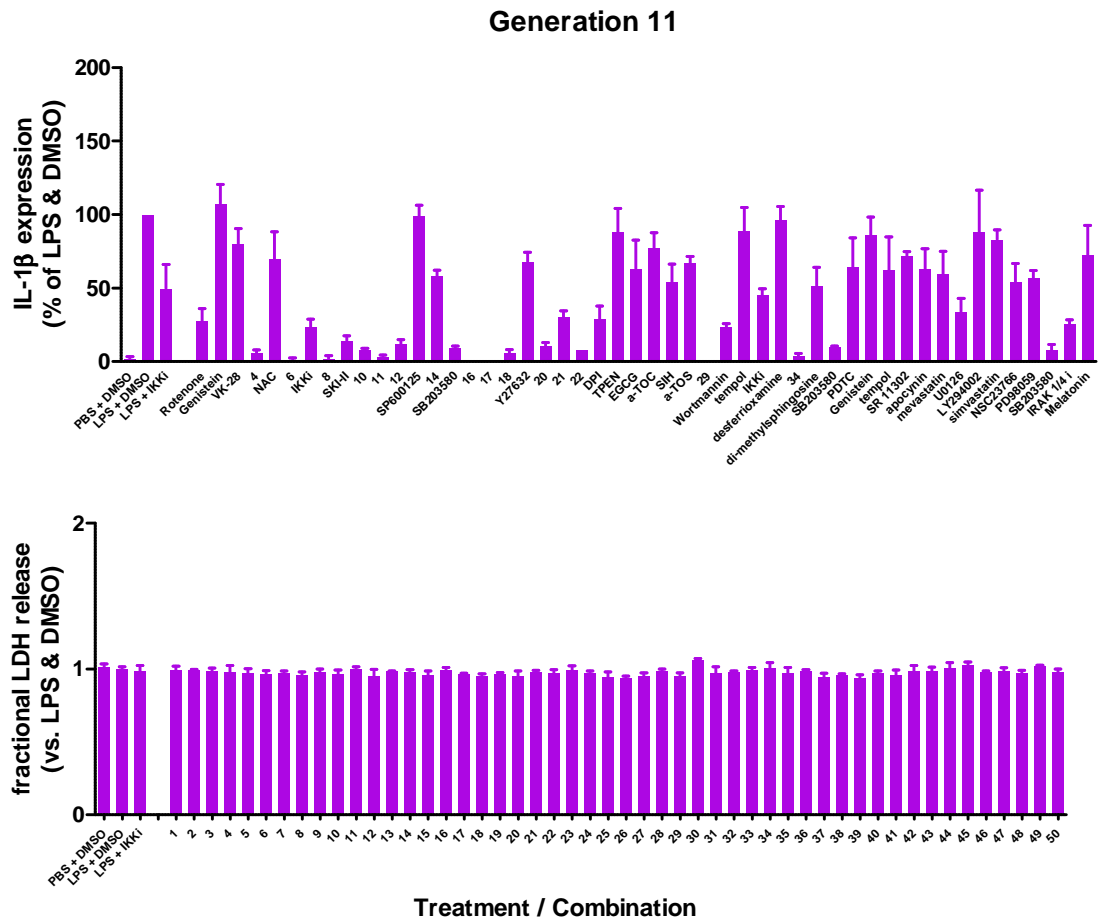

**Supplementary Figure 3.** Efficacy of chemical combinations with respect to LPS stimulated ( $1\mu\text{g} / \text{mL}$ ) IL-1 $\beta$  expression (upper plot per generation) and LDH release (lower plot per generation) in J774.A1 macrophages for all tested generations (Gen 1 – Gen 11). Vehicle (PBS; 0.1 % v/v) and positive control (LPS;  $1\mu\text{g} / \text{mL}$  & DMSO; 0.5 % v/v) responses were tested in triplicate or quintuplicate per plate respectively. Negative control (LPS;  $1\mu\text{g} / \text{mL}$  & IKKi;  $100\mu\text{M}$ , except Gen 11 where IKKi;  $3\mu\text{M}$  data was substituted) responses were tested in single wells per plate. Fifty combinations were tested per plate and all data is expressed as  $n = 3$  plates per generation  $\pm$  SEM.

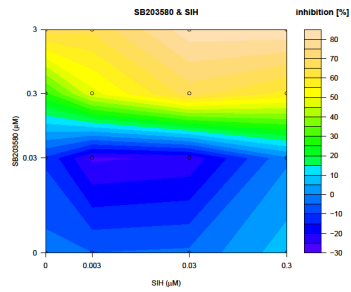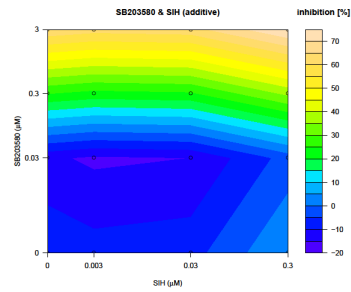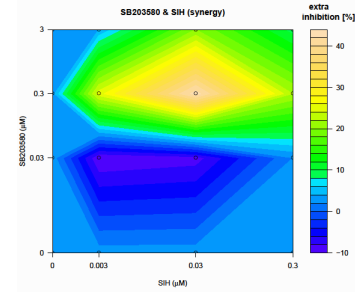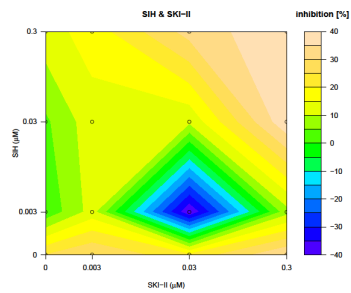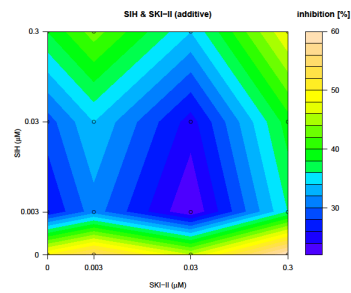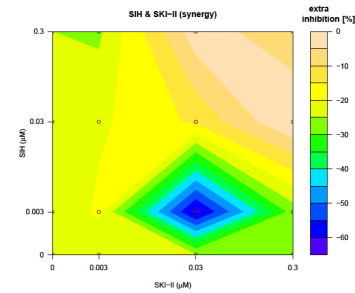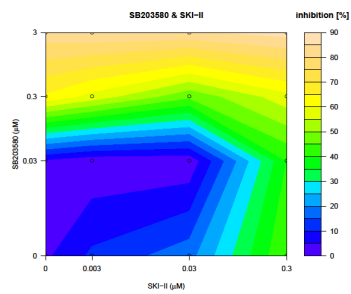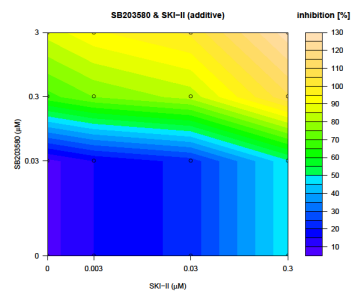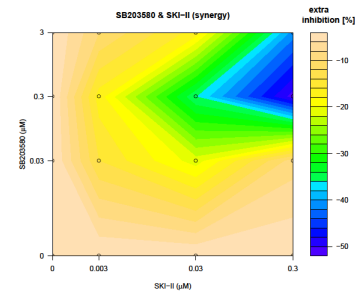

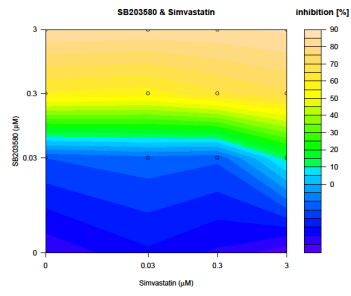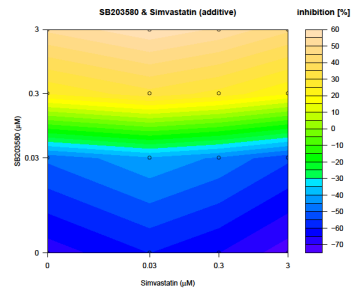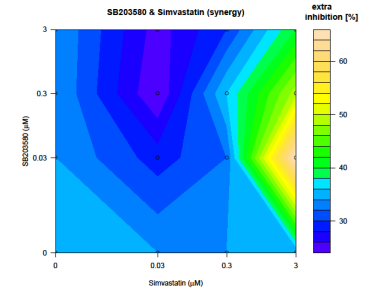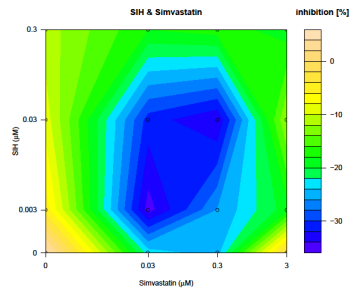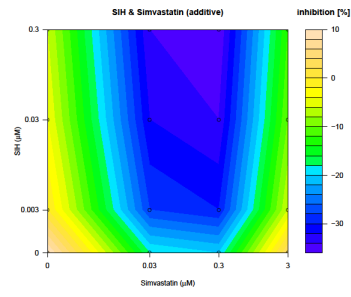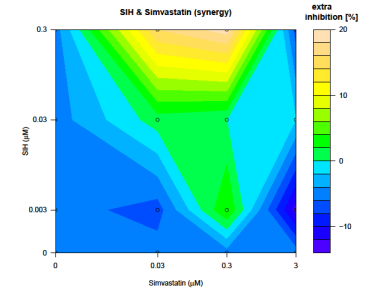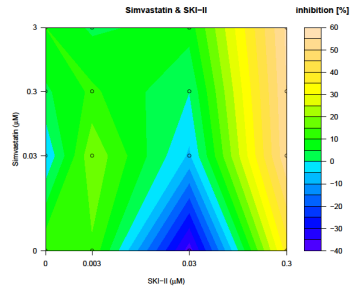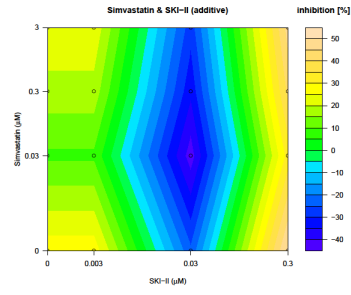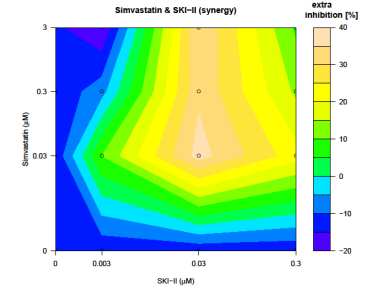



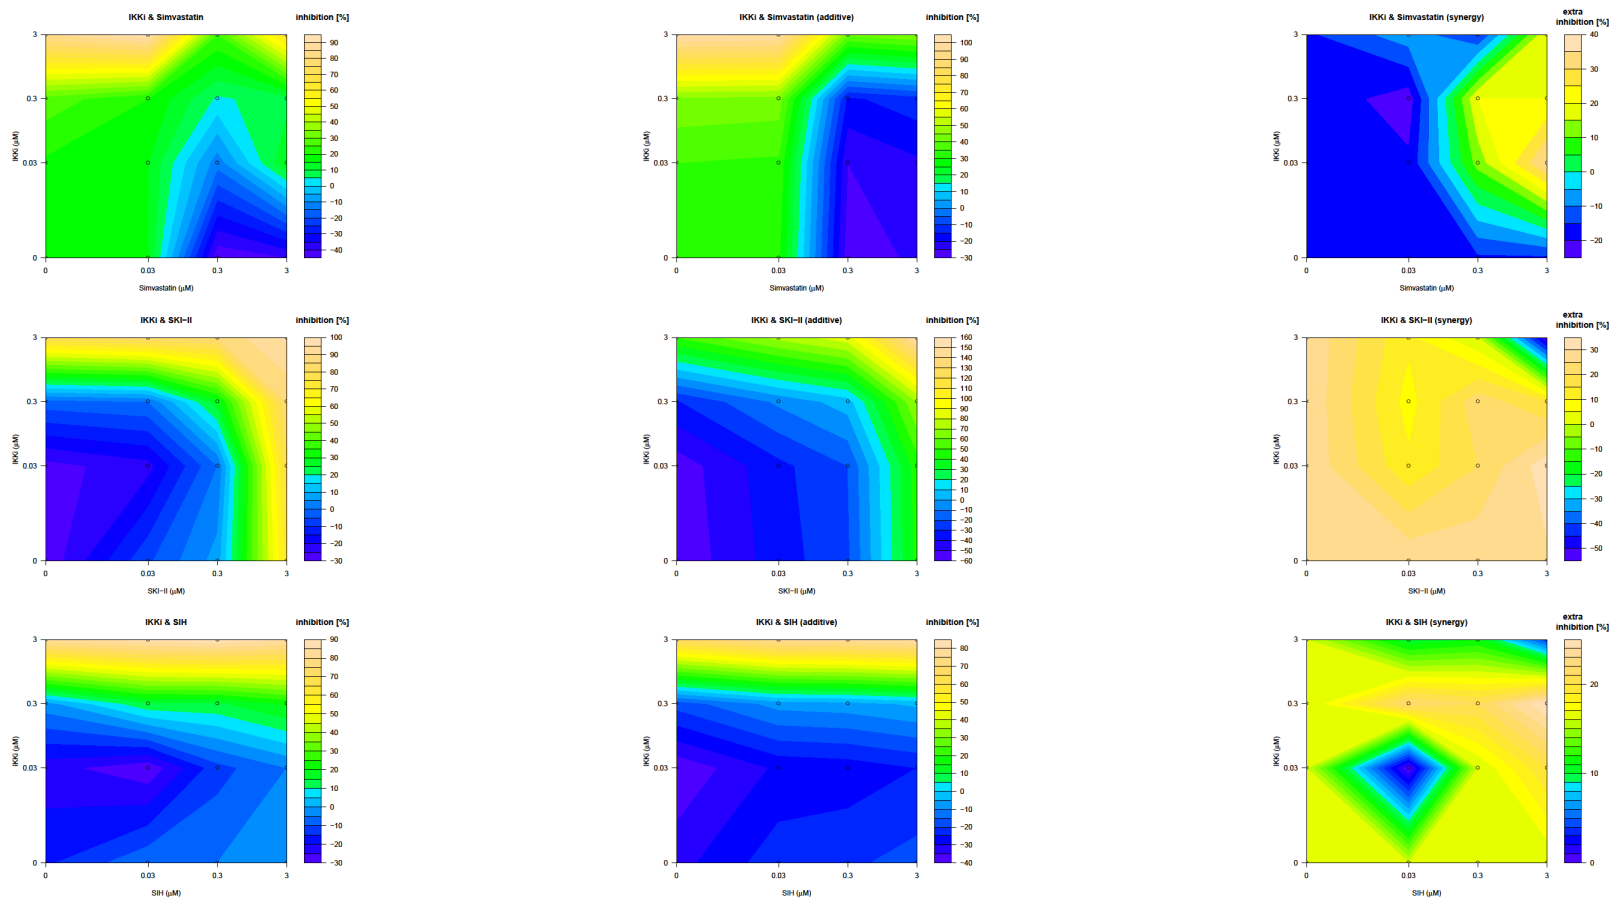

**Supplementary Figure 4.** Adaptive dose-matrix search of paired reagent combinations for potential synergy in their inhibition of IL-1 $\beta$  expression. Combination response shape plots shown are for a fully enumerated search of all possible pair wise combinations of the five reagents prioritized from the post-hoc analysis of the IBEA search (i.e. SB203580 & SIH, SIH & SKI-II, SB203580 & SKI-II, SB203580 &

Simvastatin, SIH & Simvastatin, Simvastatin & SKI-II, IKKi & Simvastatin, IKKi & SKI-II, IKKi & SIH). Three plots are shown (from left to right) representing: the experimental data; simple additive effects of the combination calculated from single reagent data in the absence of the other reagent; and detection of synergy in the paired combination by subtraction of additive effects from the experimental data. Pseudocolor mappings were performed by linear interpolation between samples. All data are expressed as  $n = 3 - 4$  plates.

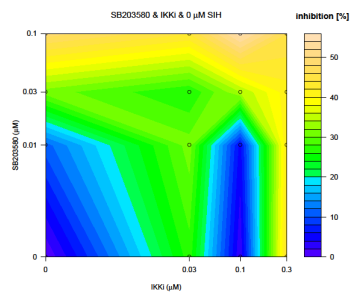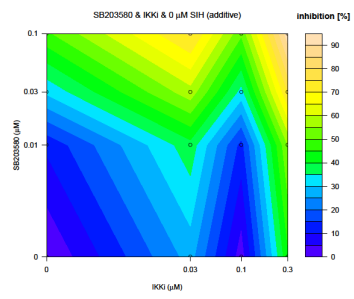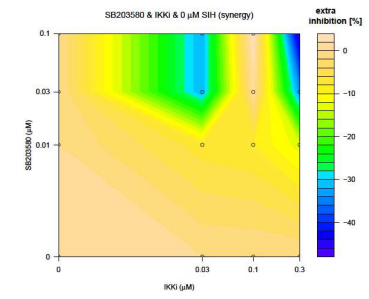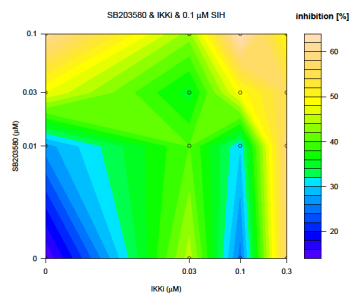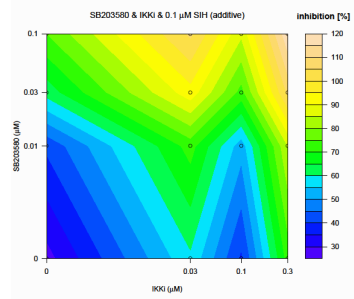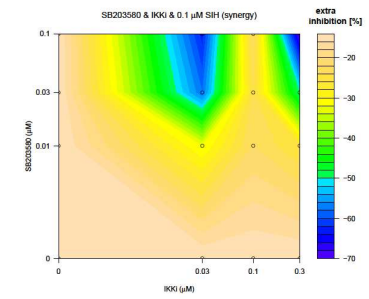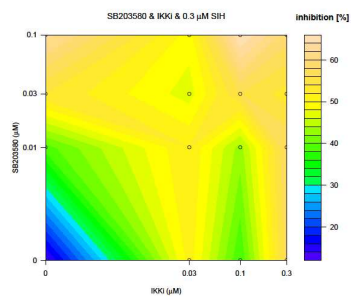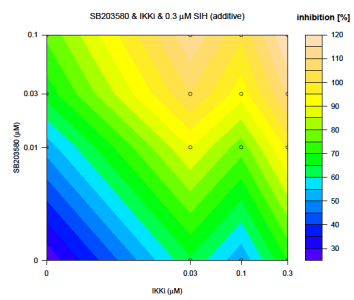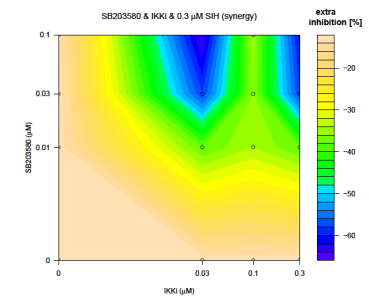

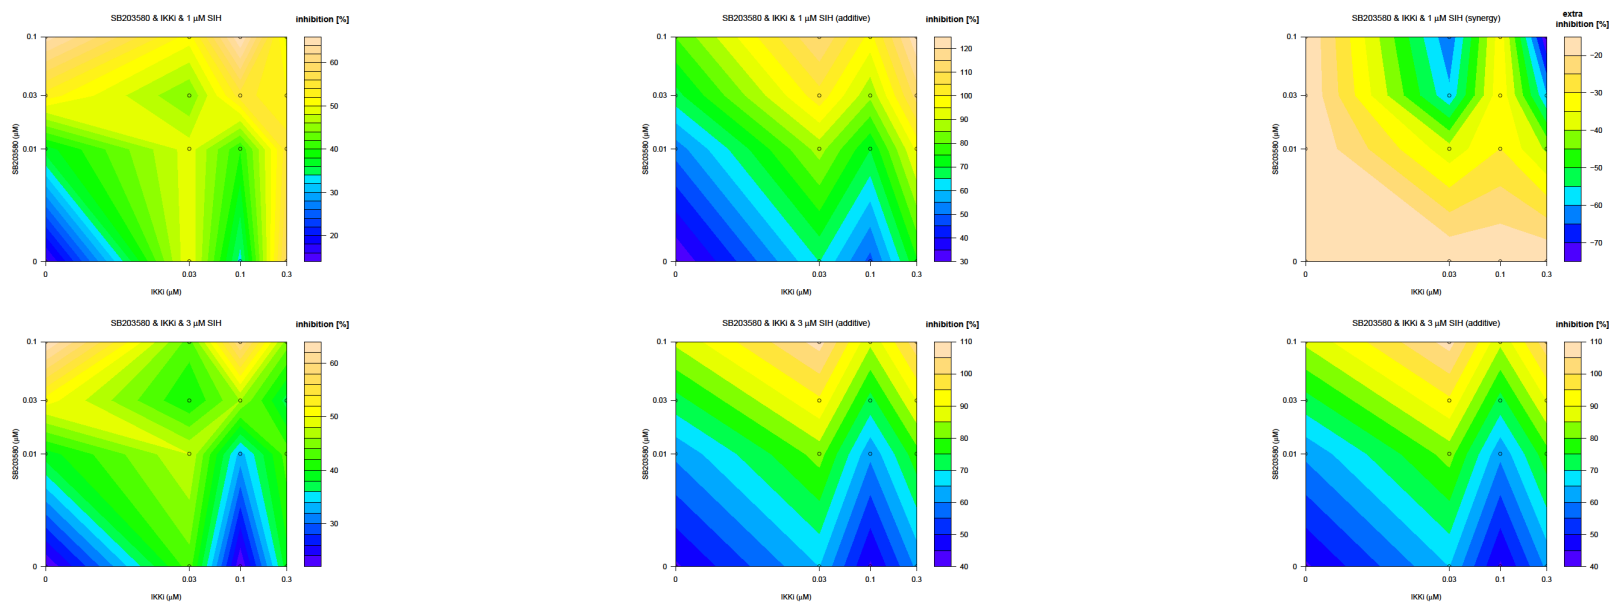

**Supplementary Figure 5.** Dose-matrix search of the triple reagent combination (SB203580, IKKi and SIH) for potential synergy in its inhibition of IL-1 $\beta$  expression. Combination response shape plots show the effect of increasing concentration (by row) of SIH (0, 0.1, 0.3, 1 and 3  $\mu$ M). Three plots are shown (from left to right) representing: the experimental data; simple additive effects of the combination calculated from single reagent data in the absence of the other reagent; and detection of synergy in the paired combination by subtraction of additive effects from the experimental data. Pseudocolor mappings were performed by linear interpolation between samples. All data are expressed as  $n = 5$  plates.

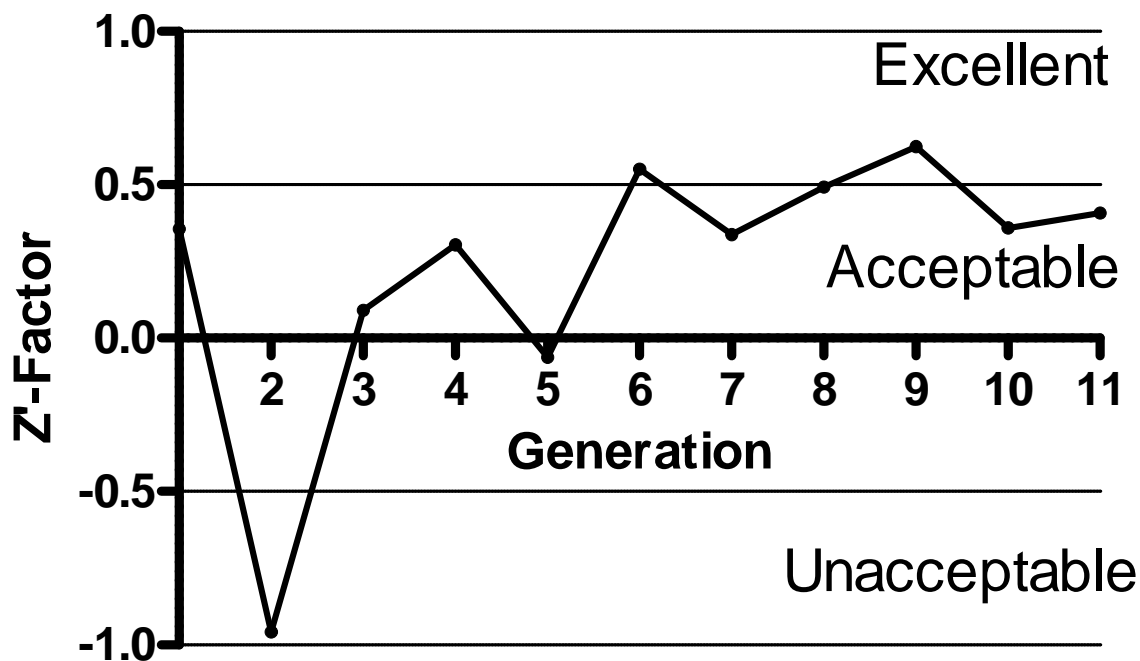

**Supplementary Figure 6.** Calculation of the Z'-Factor statistic retrospectively for the IBEA directed search revealed mean and median values of 0.33 and 0.35 respectively indicating overall that the assay was of an acceptable quality. The Z'-Factor was determined by four parameters (see data analysis); positive and negative control, mean and standard deviation respectively. At each generation there were 15 positive control wells and 3 negative control wells.

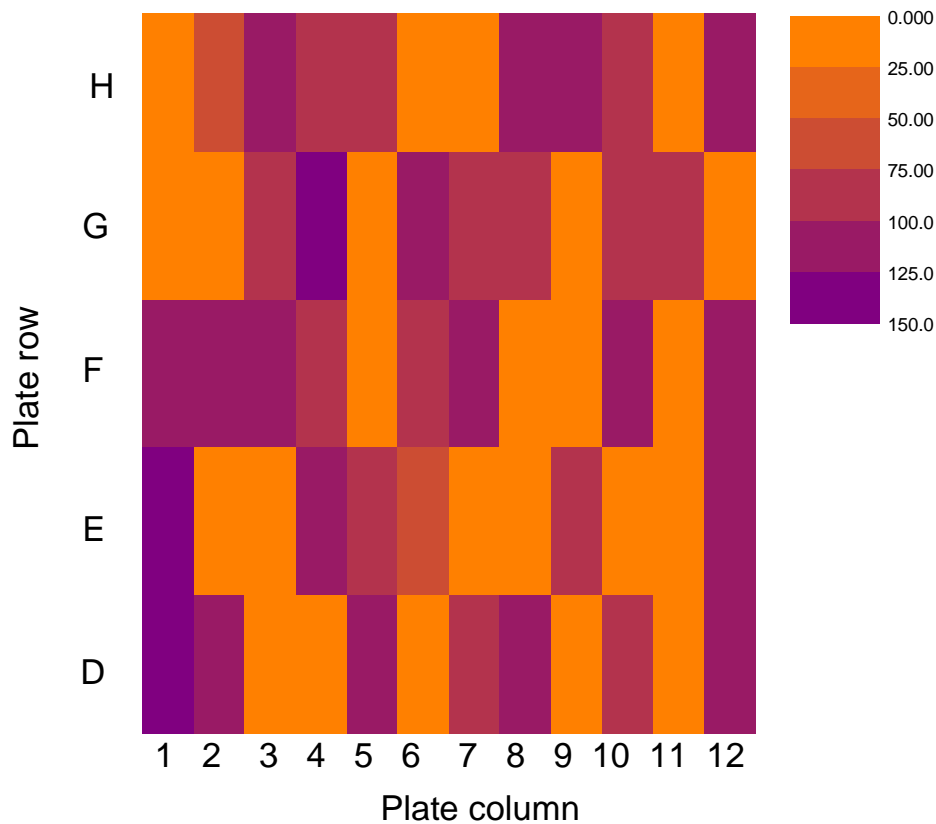

**Supplementary Figure 7.** Pseudocolor heat mapping of positive control (LPS (1 $\mu$ g / mL) & DMSO (0.5 % v/v)) responses (% IL-1 $\beta$  expression) to plates of J774.A1 macrophages during the assay of chemical combinations from all generations (Gen 1 – Gen 11). Quintuplicate positive control responses were randomly assigned across wells (D1 – H12) for each generation tested. Data are expressed as a % of the mean positive control response of the plate they were assayed on (n=5 wells) with purple colors representing high positive control responses to mauve representing lower responses. Orange space represented wells that were not sampled.

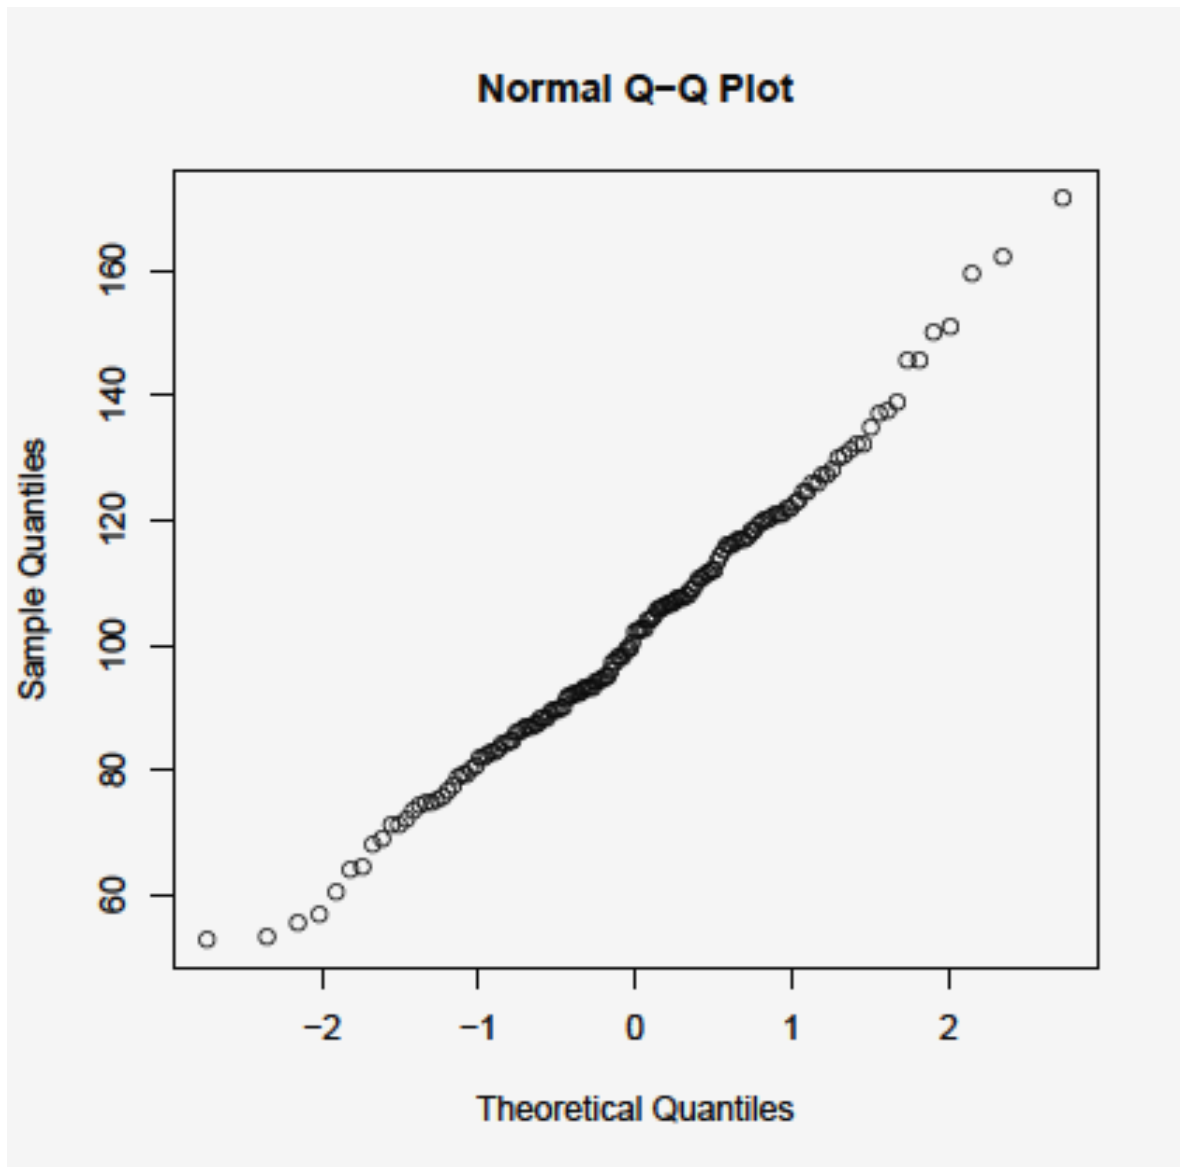

**Supplementary Figure 8.** Quantile-Quantile plots of the positive control (LPS & DMSO) responses plotted against theoretical quantiles drawn from a normal distribution confirmed the data were normally distributed.

## REFERENCES

1. Deb, K. *Multi-objective optimization using evolutionary algorithms*, (John Wiley & Sons, New York, 2001).
2. Zitzler, E. & Kunzli, S. Indicator based selection in multi-objective search. in *Parallel problem solving from nature - PPSN VIII : 8th international conference, Birmingham, UK, September 18-22, 2004 : proceedings* (ed. Yao, X.) 832 - 842 (Springer, Berlin ; [London], 2004).
3. Allmendinger, R. & Knowles, J. Evolutionary Optimization on Problems Subject to Changes of Variables. in *Parallel Problem Solving from Nature – PPSN XI*, Vol. 6239 (eds. Schaefer, R., Cotta, C., Kolodziej, J. & Rudolph, G.) 151-160 (Springer Berlin / Heidelberg, 2010).
4. Crawley, M.J. *Statistics : an introduction using R*, xiii, 327 p. (John Wiley & Sons, Chichester, 2005).
5. Zhang, J.H., Chung, T.D. & Oldenburg, K.R. A Simple Statistical Parameter for Use in Evaluation and Validation of High Throughput Screening Assays. *J Biomol Screen* **4**, 67-73 (1999).
6. Oda, K. & Kitano, H. A comprehensive map of the toll-like receptor signaling network. *Mol Syst Biol* **2**, 2006 0015 (2006).
7. Kell, D. Iron Behaving Badly: Inappropriate Iron Chelation as a Major Contributor to the Aetiology of Vascular and Other Progressive Inflammatory and Degenerative Diseases. *BMC Med Genomics* **2**, 2 (2009).
8. Kell, D.B. Towards a unifying, systems biology understanding of large-scale cellular death and destruction caused by poorly liganded iron: Parkinson's, Huntington's, Alzheimer's, prions, bactericides, chemical toxicology and others as examples. *Archives of toxicology* (2010).
9. Sui, Y. & Wu, Z. Alternative statistical parameter for high-throughput screening assay quality assessment. *Journal of biomolecular screening : the official journal of the Society for Biomolecular Screening* **12**, 229-34 (2007).



| Generation # | Combination # | Combination reagent composition |               |               |               |               |               |           |           |           | Objective 1_%IL-1b |        |        | Objective 2_cell death |      |      | Objective 3_# component reagents |
|--------------|---------------|---------------------------------|---------------|---------------|---------------|---------------|---------------|-----------|-----------|-----------|--------------------|--------|--------|------------------------|------|------|----------------------------------|
|              |               | Reagent_1                       | Reagent_2     | Reagent_3     | Reagent_4     | Reagent_5     | Reagent_6     | Reagent_7 | Reagent_8 | Reagent_9 | P1                 | P2     | P3     | P1                     | P2   | P3   |                                  |
| 1            | 1             | Diphenylene                     | FCCP          |               |               |               |               |           |           |           | 22.60              | 31.89  | 38.34  | 1.02                   | 1.04 | 1.03 | 2                                |
| 1            | 2             | TPEN                            | N-acetyl cyst | tempol        | SR 11302      | CCCP          |               |           |           |           | 39.13              | 57.11  | 61.97  | 1.02                   | 0.96 | 0.99 | 5                                |
| 1            | 3             | N-acetyl cyst                   |               |               |               |               |               |           |           |           | 110.53             | 125.92 | 118.35 | 1.00                   | 0.96 | 1.09 | 1                                |
| 1            | 4             | rotenone                        | SR 11302      | PDTC          | 2-4-dinitropr | mevastatin    | NSC23766 (    |           |           |           | 43.64              | 59.31  | 58.66  | 1.00                   | 1.00 | 1.02 | 6                                |
| 1            | 5             | alpha-tocoph                    | U0126         | PD98059       |               |               |               |           |           |           | 61.30              | 71.90  | 85.43  | 0.99                   | 0.98 | 0.98 | 3                                |
| 1            | 6             | VK-28                           | NSC23766 (    |               |               |               |               |           |           |           | 110.53             | 104.65 | 120.11 | 0.99                   | 1.00 | 0.99 | 2                                |
| 1            | 7             | DMSO                            |               |               |               |               |               |           |           |           | 116.89             | 101.55 | 115.70 | 0.97                   | 0.97 | 0.98 | 2                                |
| 1            | 8             | alpha-tocoph                    | N-acetyl cyst | U0126         | mevastatin    | Y27632 dihy   |               |           |           |           | 27.01              | 41.16  | 88.83  | 1.06                   | 0.97 | 1.03 | 5                                |
| 1            | 9             | SIH                             | wortmannin    | IRAK 1        | FCCP          | NSC23766 (    |               |           |           |           | 9.52               | 22.03  | 13.80  | 1.16                   | 1.06 | 1.05 | 5                                |
| 1            | 10            | tempol                          | apocynin      | LY294002 h    |               |               |               |           |           |           | 193.03             | 224.10 | 227.19 | 1.00                   | 1.10 | 0.99 | 3                                |
| 1            | 11            | SIH                             | tempol        | SR 11302      | NSC23766 (    |               |               |           |           |           | 130.53             | 129.92 | 121.00 | 0.87                   | 0.97 | 1.08 | 4                                |
| 1            | 12            | desferrioxam                    |               |               |               |               |               |           |           |           | 116.18             | 131.53 | 132.59 | 1.00                   | 1.00 | 0.98 | 1                                |
| 1            | 13            | alpha-tocoph                    | LY294002 h    | mevastatin    |               |               |               |           |           |           | 172.93             | 180.36 | 155.31 | 1.00                   | 0.99 | 0.96 | 3                                |
| 1            | 14            | alpha-tocoph                    | wortmannin    | CCCP          |               |               |               |           |           |           | 13.23              | 22.73  | 19.27  | 1.06                   | 1.03 | 1.06 | 3                                |
| 1            | 15            | di-methyl spl                   |               |               |               |               |               |           |           |           | 81.43              | 83.93  | 87.99  | 0.98                   | 0.98 | 0.98 | 1                                |
| 1            | 16            | U0126                           | PDTC          | NSC23766 (    |               |               |               |           |           |           | 35.92              | 46.93  | 44.79  | 1.00                   | 1.00 | 0.96 | 3                                |
| 1            | 17            | rotenone                        |               |               |               |               |               |           |           |           | 58.00              | 61.52  | 86.28  | 0.97                   | 0.99 | 1.01 | 1                                |
| 1            | 18            | tempol                          | PDTC          | SKI-II        |               |               |               |           |           |           | 25.75              | 40.45  | 31.93  | 1.01                   | 0.96 | 0.97 | 3                                |
| 1            | 19            | SKI-II                          |               |               |               |               |               |           |           |           | 28.91              | 41.89  | 39.95  | 0.99                   | 0.97 | 1.04 | 1                                |
| 1            | 20            | desferrioxam                    | SB203580      |               |               |               |               |           |           |           | 30.18              | 29.77  | 27.95  | 1.02                   | 1.04 | 0.99 | 2                                |
| 1            | 21            | desferrioxam                    | wortmannin    |               |               |               |               |           |           |           | 28.91              | 32.60  | 27.95  | 1.07                   | 1.05 | 1.09 | 2                                |
| 1            | 22            | TPEN                            | alpha-tocop   | SKI-II        |               |               |               |           |           |           | 50.78              | 45.48  | 45.59  | 1.03                   | 0.97 | 0.98 | 3                                |
| 1            | 23            | wortmannin                      |               |               |               |               |               |           |           |           | 23.23              | 29.77  | 27.16  | 1.06                   | 1.09 | 1.04 | 1                                |
| 1            | 24            | LY294002 hy                     | PD98059       | genistein     | FCCP          |               |               |           |           |           | 20.72              | 33.31  | 29.54  | 1.02                   | 1.02 | 1.02 | 4                                |
| 1            | 25            | SIH                             | apocynin      | SB203580      |               |               |               |           |           |           | 15.72              | 25.54  | 22.42  | 0.99                   | 1.00 | 1.00 | 3                                |
| 1            | 26            | N-acetyl cyst                   | LY294002 h    | IRAK 1        | SKI-II        | di-methyl spl | 2-4-dinitropr |           |           |           | 11.99              | 21.33  | 21.63  | 1.10                   | 0.96 | 1.05 | 6                                |
| 1            | 27            | alpha-tocoph                    | U0126         | IRAK 1        | CCCP          |               |               |           |           |           | 11.99              | 19.94  | 13.80  | 1.06                   | 0.99 | 1.08 | 4                                |
| 1            | 28            | apocynin                        | IRAK 1        | Y27632 dihy   |               |               |               |           |           |           | 32.09              | 42.60  | 43.97  | 1.05                   | 0.98 | 1.03 | 3                                |
| 1            | 29            | LY294002 hy                     | IRAK 1        | di-methyl spl |               |               |               |           |           |           | 32.72              | 48.38  | 52.92  | 1.05                   | 1.12 | 1.03 | 3                                |
| 1            | 30            | alpha-tocoph                    | tempol        | Diphenylene   | SR 11302      |               |               |           |           |           | 61.96              | 86.20  | 98.28  | 1.00                   | 1.02 | 1.03 | 4                                |
| 1            | 31            | apocynin                        | SKI-II        |               |               |               |               |           |           |           | 32.09              | 35.44  | 35.12  | 1.00                   | 1.04 | 1.14 | 2                                |
| 1            | 32            | DMSO                            |               |               |               |               |               |           |           |           | 126.20             | 134.75 | 127.23 | 1.03                   | 1.05 | 1.02 | 2                                |
| 1            | 33            | alpha-tocoph                    | tempol        | U0126         | PD98059       |               |               |           |           |           | 82.79              | 68.18  | 61.14  | 1.04                   | 1.02 | 0.99 | 4                                |
| 1            | 34            | DMSO                            |               |               |               |               |               |           |           |           | 109.11             | 116.40 | 138.89 | 1.00                   | 0.98 | 1.00 | 2                                |
| 1            | 35            | alpha-tocoph                    | LY294002 h    | IRAK 1        |               |               |               |           |           |           | 65.29              | 63.73  | 58.66  | 1.02                   | 0.98 | 1.02 | 3                                |
| 1            | 36            | PD98059                         | di-methyl spl | genistein     |               |               |               |           |           |           | 76.02              | 83.17  | 82.04  | 1.01                   | 1.01 | 1.01 | 3                                |
| 1            | 37            | U0126                           | SR 11302      | CCCP          |               |               |               |           |           |           | 21.34              | 19.94  | 36.73  | 1.02                   | 1.00 | 1.04 | 3                                |
| 1            | 38            | Diphenylene                     | SP600125      | SKI-II        | genistein     |               |               |           |           |           | 43.64              | 63.00  | 40.75  | 1.09                   | 1.05 | 1.06 | 4                                |
| 1            | 39            | IKK inhibitor                   |               |               |               |               |               |           |           |           | 54.71              | 51.27  | 62.79  | 1.03                   | 0.98 | 1.04 | 1                                |
| 1            | 40            | alpha-tocoph                    | Diphenylene   | wortmannin    | di-methyl spl |               |               |           |           |           | 16.96              | 24.84  | 28.75  | 1.18                   | 1.20 | 1.21 | 4                                |
| 1            | 41            | PDTC                            | di-methyl spl | genistein     | FCCP          |               |               |           |           |           | 18.21              | 35.44  | 28.75  | 1.03                   | 1.03 | 1.09 | 4                                |
| 1            | 42            | TPEN                            | genistein     |               |               |               |               |           |           |           | 134.16             | 133.95 | 167.37 | 1.00                   | 1.02 | 1.05 | 2                                |
| 1            | 43            | U0126                           | PDTC          | SKI-II        | 2-4-dinitropr |               |               |           |           |           | 18.21              | 22.03  | 24.00  | 1.04                   | 1.04 | 1.01 | 4                                |
| 1            | 44            | SIH                             | alpha-tocop   | rotenone      | Diphenylene   | IRAK 1        | SR 11302      | PDTC      |           |           | 27.01              | 32.60  | 25.58  | 1.10                   | 1.06 | 1.07 | 7                                |
| 1            | 45            | desferrioxam                    |               |               |               |               |               |           |           |           | 78.03              | 132.34 | 156.24 | 1.09                   | 1.00 | 1.00 | 1                                |
| 1            | 46            | U0126                           | di-methyl spl | genistein     |               |               |               |           |           |           | 52.09              | 53.46  | 66.11  | 1.08                   | 1.00 | 1.00 | 3                                |
| 1            | 47            | VK-28                           | wortmannin    |               |               |               |               |           |           |           | 16.34              | 34.74  | 25.58  | 1.19                   | 1.15 | 1.10 | 2                                |
| 1            | 48            | tempol                          | CCCP          |               |               |               |               |           |           |           | 27.01              | 44.76  | 43.17  | 1.00                   | 0.98 | 1.02 | 2                                |
| 1            | 49            | LY294002 hy                     | NSC23766 (    |               |               |               |               |           |           |           | 114.06             | 105.43 | 252.46 | 1.07                   | 1.05 | 1.03 | 2                                |
| 1            | 50            | genistein                       |               |               |               |               |               |           |           |           | 110.53             | 142.05 | 101.74 | 1.01                   | 0.99 | 1.06 | 1                                |
| 2            | 1             | LY294002 hy                     |               |               |               |               |               |           |           |           | 289.30             | 202.58 | 156.58 | 0.99                   | 1.01 | 0.98 | 1                                |
| 2            | 2             | U0126                           | PDTC          | NSC23766 (    |               |               |               |           |           |           | 91.26              | 69.62  | 59.74  | 0.97                   | 1.08 | 0.99 | 3                                |
| 2            | 3             | N-acetyl cyst                   | IRAK 1        | SKI-II        |               | 2-4-dinitropr |               |           |           |           | 35.74              | 35.50  | 22.13  | 0.98                   | 1.04 | 0.97 | 4                                |
| 2            | 4             | desferrioxam                    |               |               |               |               |               |           |           |           | 142.39             | 82.81  | 92.67  | 1.00                   | 1.00 | 0.98 | 1                                |
| 2            | 5             | alpha-tocoph                    | alpha-tocop   | U0126         | IRAK 1        | CCCP          | mevastatin    |           |           |           | 23.26              | 24.66  | 7.51   | 0.96                   | 1.08 | 1.03 | 6                                |
| 2            | 6             | diphenylene                     | wortmannin    | mevastatin    |               |               |               |           |           |           | 28.44              | 42.79  | 17.50  | 1.04                   | 1.19 | 0.98 | 3                                |
| 2            | 7             | tempol                          | U0126         | PDTC          | SKI-II        |               |               |           |           |           | 20.15              | 37.32  | 8.28   | 1.03                   | 0.99 | 0.98 | 4                                |
| 2            | 8             | wortmannin                      |               | 2-4-dinitropr |               |               |               |           |           |           | 23.26              | 41.87  | 22.90  | 1.00                   | 1.01 | 1.00 | 2                                |

|   |    |               |               |               |               |               |               |               |            |             |        |       |      |      |      |      |   |
|---|----|---------------|---------------|---------------|---------------|---------------|---------------|---------------|------------|-------------|--------|-------|------|------|------|------|---|
| 2 | 9  | alpha-tocoph  | U0126         | SKI-II        | di-methyl spl | genistein     |               | 2-4-dinitroph | 65.35      | 25.56       | 0.00   | 1.02  | 1.01 | 0.98 | 6    |      |   |
| 2 | 10 | diphenylene i | di-methyl spl |               |               |               |               |               | 69.62      | 78.08       | 31.44  | 1.03  | 1.01 | 1.05 | 2    |      |   |
| 2 | 11 | alpha-tocoph  | rotenone      | apocynin      |               |               |               |               | 102.21     | 85.65       | 74.11  | 1.05  | 1.05 | 1.05 | 3    |      |   |
| 2 | 12 | alpha-tocoph  | wortmannin    |               |               |               |               |               | 69.62      | 65.88       | 73.31  | 1.08  | 1.14 | 1.11 | 2    |      |   |
| 2 | 13 | SIH           | LY294002 h    | wortmannin    | IRAK 1        |               | di-methyl spl | genistein     | FCCP       | NSC23766 (  | 36.78  | 25.56 | 0.00 | 1.14 | 1.14 | 1.06 | 8 |
| 2 | 14 | apocynin      | IRAK 1        |               | Y27632 dihy   |               |               |               | 69.62      | 51.05       | 42.38  | 0.97  | 1.00 | 0.96 | 3    |      |   |
| 2 | 15 | alpha-tocoph  | U0126         | PD98059       | SR 11302      |               |               |               | 85.81      | 71.50       | 65.32  | 0.99  | 1.02 | 0.98 | 4    |      |   |
| 2 | 16 | wortmannin    | genistein     | NSC23766 (    |               |               |               |               | 25.33      | 40.96       | 22.13  | 1.01  | 1.15 | 0.97 | 3    |      |   |
| 2 | 17 | alpha-tocoph  | SB203580      | PDTC          | SKI-II        |               |               |               | 13.97      | 18.38       | 12.11  | 1.02  | 1.00 | 0.95 | 4    |      |   |
| 2 | 18 | di-methyl sph |               |               |               |               |               |               | 73.92      | 70.55       | 56.58  | 0.98  | 1.01 | 0.99 | 1    |      |   |
| 2 | 19 | SR 11302      | IKK inhibitor | di-methyl spl |               |               |               |               | 20.15      | 37.32       | 22.90  | 0.99  | 1.02 | 1.00 | 3    |      |   |
| 2 | 20 | DMSO          |               |               |               |               |               |               | 121.02     | 117.45      | 83.76  | 0.98  | 0.99 | 0.99 | 0    |      |   |
| 2 | 21 | desferrioxam  |               |               |               |               |               |               | 125.49     | 184.83      | 117.24 | 1.03  | 1.03 | 1.04 | 1    |      |   |
| 2 | 22 | tempol        | LY294002 h    | PDTC          | SKI-II        | di-methyl spl | FCCP          |               | 90.16      | 31.87       | 12.11  | 1.04  | 1.02 | 0.99 | 6    |      |   |
| 2 | 23 | U0126         | PDTC          | FCCP          | NSC23766 (    |               |               |               | 55.75      | 28.26       | 12.88  | 1.01  | 1.04 | 1.02 | 4    |      |   |
| 2 | 24 | desferrioxam  | rotenone      | wortmannin    |               |               |               |               | 57.88      | 45.53       | 26.78  | 1.05  | 1.12 | 1.05 | 3    |      |   |
| 2 | 25 | diphenylene i | U0126         | genistein     |               | 2-4-dinitroph |               |               | 92.34      | 60.29       | 32.22  | 1.00  | 1.04 | 1.28 | 4    |      |   |
| 2 | 26 | di-methyl sph |               |               |               |               |               |               | 70.70      | 72.43       | 45.53  | 1.00  | 1.02 | 1.02 | 1    |      |   |
| 2 | 27 | diphenylene i | IRAK 1        |               | SKI-II        |               |               |               | 0.00       | 24.66       | 0.00   | 1.06  | 1.08 | 1.01 | 3    |      |   |
| 2 | 28 | tempol        | U0126         | CCCP          | mevastatin    |               |               |               | 15.00      | 64.02       | 34.56  | 0.98  | 1.10 | 1.01 | 4    |      |   |
| 2 | 29 | TPEN          | rotenone      | SR 11302      | CCCP          |               |               |               | 115.46     | 109.65      | 95.93  | 1.15  | 1.14 | 1.06 | 4    |      |   |
| 2 | 30 | alpha-tocoph  | U0126         | PD98059       | SP600125      | di-methyl spl | mevastatin    |               | 66.41      | 59.37       | 64.52  | 1.06  | 1.01 | 1.02 | 6    |      |   |
| 2 | 31 | IRAK 1        |               |               |               |               |               |               | 91.26      | 69.62       | 60.54  | 1.03  | 1.01 | 1.07 | 1    |      |   |
| 2 | 32 | tempol        | wortmannin    | IRAK 1        |               | CCCP          |               |               | 42.03      | 92.32       | 15.96  | 1.15  | 1.24 | 1.30 | 4    |      |   |
| 2 | 33 | alpha-tocoph  | N-acetyl cyst | PDTC          | genistein     | FCCP          |               |               | 57.88      | 35.50       | 17.50  | 1.04  | 1.00 | 1.00 | 5    |      |   |
| 2 | 34 | IRAK 1        |               | SR 11302      | NSC23766 (    |               |               |               | 67.48      | 33.68       | 23.68  | 0.99  | 1.06 | 1.00 | 3    |      |   |
| 2 | 35 | rotenone      | PDTC          |               | 2-4-dinitroph |               |               |               | 82.56      | 62.16       | 55.78  | 1.02  | 1.06 | 1.06 | 3    |      |   |
| 2 | 36 | U0126         | PD98059       |               |               |               |               |               | 63.20      | 80.92       | 62.93  | 0.98  | 1.10 | 0.95 | 2    |      |   |
| 2 | 37 | desferrioxam  | alpha-tocoph  | diphenylene   | U0126         |               |               |               | 45.18      | 54.74       | 24.45  | 1.07  | 1.04 | 0.96 | 4    |      |   |
| 2 | 38 | VK-28         | U0126         | NSC23766 (    |               |               |               |               | 50.46      | 43.70       | 40.82  | 1.01  | 1.00 | 1.00 | 3    |      |   |
| 2 | 39 | alpha-tocoph  | tempol        | apocynin      | LY294002 h    |               |               |               | 159.49     | 144.13      | 138.89 | 0.99  | 1.02 | 1.01 | 4    |      |   |
| 2 | 40 | desferrioxam  | wortmannin    | SB203580      | genistein     | FCCP          |               |               | 0.00       | 16.59       | 0.00   | 1.12  | 1.03 | 1.18 | 5    |      |   |
| 2 | 41 | desferrioxam  | NSC23766 (    | Y27632 dihy   |               |               |               |               | 166.38     | 94.23       | 75.71  | 1.02  | 1.01 | 0.97 | 3    |      |   |
| 2 | 42 | N-acetyl cyst | PDTC          |               |               |               |               |               | 142.39     | 88.50       | 91.87  | 1.01  | 1.10 | 1.03 | 2    |      |   |
| 2 | 43 | SIH           | tempol        |               |               |               |               |               | 137.86     | 100.00      | 77.32  | 0.99  | 1.04 | 0.93 | 2    |      |   |
| 2 | 44 | alpha-tocoph  | tempol        | diphenylene   | SR 11302      | genistein     |               |               | 107.70     | 90.42       | 58.16  | 1.04  | 1.04 | 1.02 | 5    |      |   |
| 2 | 45 | VK-28         | SIH           | alpha-tocoph  | U0126         | SR 11302      | di-methyl spl | mevastatin    | NSC23766 ( | Y27632 dihy | 0.00   | 47.37 | 9.81 | 0.99 | 1.12 | 1.05 | 9 |
| 2 | 46 | SB203580      | PDTC          | di-methyl spl | FCCP          |               |               |               | 12.95      | 64.02       | 0.00   | 1.01  | 1.16 | 0.91 | 4    |      |   |
| 2 | 47 | alpha-tocoph  | alpha-tocoph  | U0126         | PDTC          | SKI-II        | CCCP          |               | 21.19      | 28.26       | 6.74   | 1.07  | 0.98 | 0.92 | 6    |      |   |
| 2 | 48 | N-acetyl cyst | LY294002 h    | SR 11302      | FCCP          |               | 2-4-dinitroph |               | 30.52      | 40.96       | 55.78  | 1.00  | 0.93 | 1.07 | 5    |      |   |
| 2 | 49 | SIH           | desferrioxam  | tempol        | SR 11302      | NSC23766 (    |               |               | 68.55      | 127.25      | 84.57  | 0.99  | 0.94 | 0.94 | 5    |      |   |
| 2 | 50 | tempol        | CCCP          |               |               |               |               |               | 51.51      | 63.08       | 43.17  | 0.97  | 1.02 | 1.00 | 2    |      |   |
| 3 | 1  | TPEN          | U0126         |               |               |               |               |               | 48.64      | 34.47       | 19.66  | 1.06  | 1.05 | 1.06 | 2    |      |   |
| 3 | 2  | tempol        | CCCP          |               |               |               |               |               | 27.13      | 13.59       | 19.10  | 1.00  | 1.05 | 1.02 | 2    |      |   |
| 3 | 3  | apocynin      | PDTC          | SKI-II        |               |               |               |               | 13.90      | 8.61        | 11.92  | 1.11  | 1.03 | 1.03 | 3    |      |   |
| 3 | 4  | DMSO          |               |               |               |               |               |               | 91.37      | 82.76       | 52.14  | 1.02  | 0.98 | 0.97 | 0    |      |   |
| 3 | 5  | wortmannin    |               | 2-4-dinitroph |               |               |               |               | 42.34      | 42.85       | 49.81  | 1.04  | 0.99 | 1.02 | 2    |      |   |
| 3 | 6  | tempol        | SP600125      | SKI-II        | CCCP          |               |               |               | 9.55       | 7.38        | 10.83  | 1.03  | 1.01 | 1.05 | 4    |      |   |
| 3 | 7  | alpha-tocoph  | U0126         | PD98059       |               |               |               |               | 69.08      | 80.04       | 48.06  | 0.98  | 1.00 | 0.96 | 3    |      |   |
| 3 | 8  | VK-28         | PDTC          | FCCP          |               |               |               |               | 7.93       | 7.38        | 6.46   | 0.98  | 1.01 | 0.98 | 3    |      |   |
| 3 | 9  | VK-28         | wortmannin    | PDTC          | IKK inhibitor | SKI-II        |               |               | 5.77       | 0.00        | 19.66  | 1.10  | 1.08 | 1.28 | 5    |      |   |
| 3 | 10 | tempol        | apocynin      | U0126         | PDTC          | FCCP          |               |               | 11.18      | 11.10       | 11.92  | 1.05  | 1.05 | 1.09 | 5    |      |   |
| 3 | 11 | SIH           | apocynin      | IRAK 1        |               |               |               |               | 31.60      | 35.12       | 41.70  | 1.02  | 1.00 | 1.03 | 3    |      |   |
| 3 | 12 | SIH           | tempol        | apocynin      | SB203580      | PDTC          |               |               | 15.54      | 13.59       | 14.13  | 1.00  | 1.01 | 1.00 | 5    |      |   |
| 3 | 13 | SB203580      | PDTC          |               |               |               |               |               | 17.18      | 12.35       | 11.38  | 0.98  | 1.00 | 0.99 | 2    |      |   |
| 3 | 14 | desferrioxam  | N-acetyl cyst | SP600125      | SR 11302      | SKI-II        | CCCP          | 2-4-dinitroph | NSC23766 ( | 9.55        | 8.61   | 10.28 | 1.00 | 1.00 | 1.01 | 8    |   |
| 3 | 15 | apocynin      | U0126         | PDTC          |               | 2-4-dinitroph | Y27632 dihy   |               | 70.26      | 78.67       | 50.97  | 0.99  | 0.99 | 0.97 | 5    |      |   |
| 3 | 16 | desferrioxam  | tempol        | SB203580      |               |               |               |               | 13.36      | 12.35       | 13.58  | 1.00  | 0.95 | 1.02 | 3    |      |   |
| 3 | 17 | DMSO          |               |               |               |               |               |               | 76.23      | 78.67       | 108.86 | 0.97  | 1.00 | 1.01 | 0    |      |   |
| 3 | 18 | rotenone      |               |               |               |               |               |               | 34.41      | 40.91       | 28.05  | 1.00  | 1.03 | 0.97 | 1    |      |   |

|   |    |               |               |                   |               |            |                   |        |        |        |        |      |      |      |   |
|---|----|---------------|---------------|-------------------|---------------|------------|-------------------|--------|--------|--------|--------|------|------|------|---|
| 3 | 19 | wortmannin    |               | 2-4-dinitrophenol |               |            |                   |        | 22.69  | 23.64  | 20.21  | 1.03 | 1.02 | 0.98 | 2 |
| 3 | 20 | SIH           | SB203580      | SKI-II            |               |            |                   |        | 0.00   | 0.00   | 0.00   | 0.97 | 0.98 | 0.93 | 3 |
| 3 | 21 | SB203580      | PDTC          | di-methyl spl     | genistein     | FCCP       |                   |        | 0.00   | 0.00   | 6.46   | 0.98 | 1.00 | 1.04 | 5 |
| 3 | 22 |               |               | 2-4-dinitrophenol |               |            |                   |        | 121.42 | 185.91 | 191.90 | 0.99 | 1.01 | 1.06 | 1 |
| 3 | 23 | VK-28         | wortmannin    | NSC23766 (        |               |            |                   |        | 33.29  | 38.98  | 41.70  | 1.02 | 1.00 | 1.06 | 3 |
| 3 | 24 | tempol        | U0126         | PDTC              |               |            |                   |        | 87.71  | 88.93  | 91.88  | 1.03 | 1.00 | 1.03 | 3 |
| 3 | 25 | alpha-tocoph  | SB203580      | U0126             | PD98059       | SKI-II     | genistein         |        | 5.77   | 0.00   | 5.92   | 1.02 | 0.99 | 1.00 | 6 |
| 3 | 26 | di-methyl spl |               |                   |               |            |                   |        | 79.23  | 65.22  | 86.95  | 1.00 | 0.98 | 1.02 | 1 |
| 3 | 27 | tempol        | wortmannin    | SB203580          | genistein     |            |                   |        | 14.99  | 16.72  | 13.03  | 0.98 | 1.00 | 0.97 | 4 |
| 3 | 28 | SIH           | alpha-tocoph  | SB203580          | SR 11302      | PDTC       | NSC23766 (        |        | 11.72  | 9.86   | 11.38  | 0.97 | 0.95 | 0.99 | 6 |
| 3 | 29 | SIH           | SB203580      |                   |               |            |                   |        | 12.81  | 13.59  | 14.13  | 0.98 | 0.96 | 1.01 | 2 |
| 3 | 30 | SIH           | alpha-tocoph  | wortmannin        |               |            |                   |        | 38.37  | 40.26  | 35.41  | 1.00 | 1.05 | 0.97 | 3 |
| 3 | 31 | SIH           | tempol        | U0126             | PDTC          | SKI-II     | di-methyl spl     |        | 8.47   | 8.61   | 7.55   | 0.97 | 0.99 | 0.96 | 6 |
| 3 | 32 | TPEN          | alpha-tocoph  | wortmannin        | SKI-II        |            |                   |        | 9.01   | 6.76   | 8.09   | 1.39 | 1.56 | 1.40 | 4 |
| 3 | 33 | alpha-tocoph  | SB203580      | PDTC              |               |            | 2-4-dinitrophenol |        | 13.90  | 13.59  | 16.33  | 1.00 | 0.97 | 1.02 | 4 |
| 3 | 34 | VK-28         | desferrioxam  | tempol            | LY294002 h    | SKI-II     | Y27632 dihy       |        | 18.28  | 16.09  | 17.99  | 1.02 | 1.02 | 1.02 | 6 |
| 3 | 35 | SKI-II        |               |                   |               |            |                   |        | 12.27  | 11.10  | 13.58  | 1.00 | 0.98 | 1.01 | 1 |
| 3 | 36 | alpha-tocoph  | apocynin      | wortmannin        | PD98059       | CCCP       | mevastatin        |        | 0.00   | 9.86   | 11.92  | 1.03 | 1.05 | 1.01 | 6 |
| 3 | 37 | wortmannin    | genistein     |                   |               |            |                   |        | 40.63  | 42.85  | 46.32  | 1.00 | 0.97 | 1.02 | 2 |
| 3 | 38 | desferrioxam  | N-acetyl cyst | tempol            | NSC23766 (    |            |                   |        | 62.59  | 75.29  | 62.74  | 0.95 | 0.99 | 0.95 | 4 |
| 3 | 39 | SIH           | tempol        | SR 11302          |               |            |                   |        | 88.92  | 84.81  | 78.37  | 0.95 | 0.97 | 0.97 | 3 |
| 3 | 40 | IRAK 1        |               | SKI-II            | NSC23766 (    |            |                   |        | 10.63  | 12.35  | 11.38  | 1.04 | 1.02 | 1.09 | 3 |
| 3 | 41 | tempol        | U0126         | PDTC              | SKI-II        | NSC23766 ( |                   |        | 6.85   | 8.00   | 8.64   | 1.04 | 1.05 | 1.07 | 5 |
| 3 | 42 | SKI-II        | Y27632 dihy   |                   |               |            |                   |        | 14.45  | 13.59  | 7.55   | 1.01 | 1.03 | 0.97 | 2 |
| 3 | 43 | VK-28         | SIH           | alpha-tocoph      | SKI-II        |            |                   |        | 13.36  | 14.22  | 15.78  | 0.97 | 1.00 | 1.05 | 4 |
| 3 | 44 | CCCP          |               |                   |               |            |                   |        | 18.83  | 24.28  | 25.24  | 0.98 | 1.03 | 1.02 | 1 |
| 3 | 45 | alpha-tocoph  | PD98059       | SKI-II            |               |            |                   |        | 11.72  | 11.10  | 13.58  | 1.00 | 0.98 | 1.00 | 3 |
| 3 | 46 | tempol        | FCCP          |                   |               |            |                   |        | 9.55   | 10.48  | 11.92  | 1.00 | 0.99 | 1.00 | 2 |
| 3 | 47 | SR 11302      | CCCP          |                   |               |            |                   |        | 24.35  | 20.49  | 21.89  | 1.00 | 1.02 | 0.94 | 2 |
| 3 | 48 | U0126         | PDTC          |                   |               |            |                   |        | 82.85  | 91.68  | 59.78  | 0.99 | 1.01 | 0.98 | 2 |
| 3 | 49 | U0126         | SR 11302      | CCCP              |               |            |                   |        | 21.04  | 23.64  | 19.10  | 1.02 | 1.02 | 0.98 | 3 |
| 3 | 50 | rotenone      | SP600125      |                   |               |            |                   |        | 66.12  | 70.57  | 61.56  | 1.05 | 1.02 | 1.06 | 2 |
| 4 | 1  | TPEN          | alpha-tocoph  | U0126             |               |            |                   |        | 45.45  | 102.61 | 65.41  | 0.87 | 1.03 | 1.03 | 3 |
| 4 | 2  | PD98059       |               |                   |               |            |                   |        | 107.75 | 148.58 | 83.08  | 0.97 | 1.02 | 1.01 | 1 |
| 4 | 3  | apocynin      | SKI-II        | EGCG              |               |            |                   |        | 44.99  | 50.34  | 42.37  | 1.01 | 1.12 | 0.98 | 3 |
| 4 | 4  | tempol        | SKI-II        |                   |               |            |                   |        | 18.64  | 35.98  | 45.59  | 0.92 | 1.02 | 1.00 | 2 |
| 4 | 5  | SIH           | desferrioxam  | diphenylene       | LY294002 h    | PD98059    | IRAK 1            | SKI-II | 11.14  | 13.23  | 9.95   | 1.05 | 1.11 | 1.02 | 7 |
| 4 | 6  | VK-28         | TPEN          | alpha-tocoph      | EGCG          |            |                   |        | 73.19  | 126.38 | 112.61 | 0.95 | 1.09 | 1.01 | 4 |
| 4 | 7  | VK-28         | desferrioxam  | SB203580          |               |            |                   |        | 5.25   | 8.97   | 7.21   | 0.99 | 1.12 | 0.97 | 3 |
| 4 | 8  | U0126         | SKI-II        |                   |               |            |                   |        | 61.11  | 37.25  | 36.97  | 1.03 | 0.98 | 0.95 | 2 |
| 4 | 9  | SIH           | TPEN          | apocynin          | IRAK 1        |            | SKI-II            |        | 19.05  | 49.79  | 25.07  | 0.95 | 1.09 | 0.99 | 5 |
| 4 | 10 | apocynin      | PD98059       | SR 11302          | genistein     |            |                   |        | 47.76  | 78.04  | 59.10  | 0.91 | 0.99 | 0.98 | 4 |
| 4 | 11 | SIH           | desferrioxam  | tempol            | SR 11302      | NSC23766 ( | Y27632 dihy       |        | 56.18  | 107.14 | 57.38  | 1.04 | 1.01 | 0.92 | 6 |
| 4 | 12 | diphenylene   | di-methyl spl |                   |               |            |                   |        | 22.13  | 55.74  | 37.29  | 0.91 | 1.10 | 1.09 | 2 |
| 4 | 13 | tempol        | rotenone      | SR 11302          | EGCG          |            |                   |        | 50.13  | 42.78  | 36.89  | 1.04 | 1.05 | 1.06 | 4 |
| 4 | 14 | SR 11302      | IKK inhibitor | di-methyl spl     |               |            |                   |        | 71.03  | 65.83  | 40.93  | 1.02 | 1.08 | 0.96 | 3 |
| 4 | 15 | DMSO          |               |                   |               |            |                   |        | 44.72  | 121.99 | 93.24  | 0.96 | 1.06 | 1.00 | 0 |
| 4 | 16 | apocynin      | PDTC          | SKI-II            |               |            |                   |        | 13.16  | 48.37  | 27.42  | 0.92 | 1.10 | 0.97 | 3 |
| 4 | 17 | wortmannin    | SB203580      | SKI-II            | genistein     |            |                   |        | 3.32   | 4.32   | 3.66   | 1.04 | 0.99 | 1.01 | 4 |
| 4 | 18 | PDTC          | SKI-II        |                   |               |            |                   |        | 9.75   | 54.14  | 23.89  | 0.93 | 1.13 | 1.00 | 2 |
| 4 | 19 | desferrioxam  | N-acetyl cyst | tempol            | di-methyl spl | NSC23766 ( | simvastatin       |        | 35.18  | 67.47  | 50.42  | 0.92 | 1.00 | 0.97 | 6 |
| 4 | 20 | SIH           | desferrioxam  | PDTC              |               |            |                   |        | 80.31  | 78.18  | 83.73  | 1.04 | 0.99 | 0.92 | 3 |
| 4 | 21 | alpha-tocoph  | apocynin      | SKI-II            | simvastatin   |            |                   |        | 12.85  | 41.24  | 21.50  | 0.90 | 1.05 | 1.01 | 4 |
| 4 | 22 | SIH           | TPEN          | N-acetyl cyst     | SB203580      | PD98059    | SR 11302          |        | 7.82   | 7.42   | 6.93   | 1.03 | 1.01 | 1.01 | 6 |
| 4 | 23 | alpha-tocoph  | PD98059       |                   |               |            |                   |        | 70.33  | 108.51 | 73.77  | 0.99 | 1.04 | 0.95 | 2 |
| 4 | 24 | SIH           | alpha-tocoph  | SB203580          | PDTC          | SKI-II     |                   |        | 2.02   | 3.97   | 3.93   | 0.88 | 0.99 | 0.99 | 5 |
| 4 | 25 | SIH           | tempol        | SB203580          | SR 11302      | SKI-II     | NSC23766 (        |        | 4.47   | 5.46   | 3.45   | 1.00 | 1.04 | 0.95 | 6 |
| 4 | 26 | apocynin      | PDTC          | SKI-II            |               |            |                   |        | 10.83  | 40.94  | 25.01  | 0.91 | 1.04 | 0.97 | 3 |
| 4 | 27 | desferrioxam  | rotenone      | SKI-II            | genistein     |            |                   |        | 19.38  | 20.67  | 18.08  | 1.08 | 1.02 | 1.03 | 4 |
| 4 | 28 | tempol        | SB203580      | PDTC              | simvastatin   |            |                   |        | 3.81   | 10.10  | 6.38   | 0.90 | 1.07 | 0.95 | 4 |

|   |    |                 |               |               |               |               |             |           |        |        |        |      |      |      |   |
|---|----|-----------------|---------------|---------------|---------------|---------------|-------------|-----------|--------|--------|--------|------|------|------|---|
| 4 | 29 | SIH             | tempol        |               |               |               |             |           | 57.00  | 111.81 | 94.79  | 0.89 | 0.99 | 0.99 | 2 |
| 4 | 30 | IRAK 1          |               | NSC23766 (    |               |               |             |           | 33.16  | 25.38  | 34.82  | 1.04 | 0.98 | 0.97 | 2 |
| 4 | 31 | SIH             | apocynin      | SB203580      |               |               |             |           | 10.53  | 10.63  | 9.71   | 1.06 | 0.99 | 0.99 | 3 |
| 4 | 32 | apocynin        | SB203580      | SP600125      | PDTC          |               |             |           | 8.87   | 11.61  | 5.55   | 1.01 | 1.06 | 1.03 | 4 |
| 4 | 33 | apocynin        | PD98059       | SKI-II        |               |               |             |           | 31.04  | 36.66  | 20.90  | 1.00 | 1.03 | 0.99 | 3 |
| 4 | 34 | SIH             | rotenone      |               |               |               |             |           | 21.57  | 38.34  | 43.40  | 0.92 | 1.04 | 1.06 | 2 |
| 4 | 35 | SIH             | SB203580      | SKI-II        |               |               |             |           | 3.76   | 6.11   | 3.66   | 1.02 | 1.06 | 1.01 | 3 |
| 4 | 36 | N-acetyl cyst   | apocynin      |               |               |               |             |           | 53.15  | 151.72 | 76.99  | 0.92 | 1.03 | 0.97 | 2 |
| 4 | 37 | SIH             | SB203580      | SKI-II        |               |               |             |           | 2.56   | 5.11   | 3.45   | 0.93 | 1.05 | 1.01 | 3 |
| 4 | 38 | SIH             |               |               |               |               |             |           | 113.26 | 109.03 | 82.95  | 1.01 | 0.97 | 0.99 | 1 |
| 4 | 39 | TPEN            | tempol        | U0126         | Y27632 dihy   |               |             |           | 58.66  | 177.34 | 104.52 | 0.93 | 1.07 | 0.94 | 4 |
| 4 | 40 | wortmannin      | U0126         | IRAK 1        |               |               |             |           | 45.45  | 36.66  | 42.28  | 1.03 | 0.96 | 0.98 | 3 |
| 4 | 41 | SIH             | SB203580      | SKI-II        |               |               |             |           | 2.94   | 3.76   | 3.18   | 1.07 | 0.99 | 1.02 | 3 |
| 4 | 42 | IKK inhibitor i |               |               |               |               |             |           | 49.75  | 97.44  | 47.65  | 1.00 | 1.13 | 1.05 | 1 |
| 4 | 43 | VK-28           | alpha-tocoph  | SKI-II        | EGCG          |               |             |           | 38.58  | 19.17  | 31.19  | 1.00 | 0.97 | 1.03 | 4 |
| 4 | 44 | SB203580        | PD98059       | SKI-II        | di-methyl spl | NSC23766 (    | simvastatin | EGCG      | 2.51   | 3.62   | 2.81   | 1.03 | 1.09 | 1.07 | 7 |
| 4 | 45 | diphenylene i   |               |               |               |               |             |           | 20.26  | 58.66  | 32.03  | 1.07 | 1.15 | 1.10 | 1 |
| 4 | 46 | SKI-II          |               |               |               |               |             |           | 37.74  | 49.57  | 28.01  | 0.98 | 1.08 | 0.95 | 1 |
| 4 | 47 | desferrioxam    | alpha-tocoph  | U0126         | PD98059       | IKK inhibitor | simvastatin |           | 36.66  | 30.41  | 46.58  | 1.11 | 1.00 | 1.03 | 6 |
| 4 | 48 | SIH             | SB203580      | SP600125      | IRAK 1        |               |             |           | 3.98   | 6.11   | 4.52   | 1.08 | 1.13 | 0.94 | 4 |
| 4 | 49 | tempol          | wortmannin    | SB203580      |               |               |             |           | 9.70   | 5.82   | 7.83   | 1.19 | 0.99 | 0.98 | 3 |
| 4 | 50 | rotenone        |               |               |               |               |             |           | 30.34  | 32.36  | 28.30  | 1.10 | 1.04 | 1.07 | 1 |
| 5 | 1  | apocynin        | SB203580      | SR 11302      |               |               |             |           | 16.47  | 15.44  | 13.58  | 1.01 | 1.05 | 1.01 | 3 |
| 5 | 2  | SIH             | SKI-II        | di-methyl spl |               |               |             |           | 35.99  | 35.58  | 13.67  | 0.99 | 1.04 | 0.98 | 3 |
| 5 | 3  | SIH             | tempol        | SKI-II        |               |               |             |           | 48.78  | 35.28  | 22.38  | 0.98 | 1.03 | 1.02 | 3 |
| 5 | 4  | tempol          | wortmannin    | PDTC          | simvastatin   |               |             |           | 111.97 | 28.97  | 19.28  | 0.99 | 1.06 | 1.01 | 4 |
| 5 | 5  | tempol          | SP600125      | PDTC          | SKI-II        | di-methyl spl |             |           | 38.77  | 39.81  | 35.51  | 0.97 | 1.05 | 1.05 | 5 |
| 5 | 6  | PDTC            | IKK inhibitor | SKI-II        |               |               |             |           | 26.77  | 28.53  | 16.17  | 1.02 | 1.12 | 1.03 | 3 |
| 5 | 7  | alpha-tocoph    | diphenylene   | SB203580      | PDTC          | SKI-II        | Y27632 dihy |           | 5.64   | 5.61   | 4.46   | 0.99 | 1.02 | 1.10 | 6 |
| 5 | 8  | TPEN            | tempol        | apocynin      | SB203580      | IRAK 1        | SR 11302    | genistein | 16.82  | 15.04  | 9.72   | 1.00 | 1.02 | 0.99 | 7 |
| 5 | 9  | SB203580        | SKI-II        |               |               |               |             |           | 7.08   | 6.51   | 4.63   | 1.03 | 1.00 | 0.98 | 2 |
| 5 | 10 | alpha-tocoph    | tempol        | SB203580      | PDTC          | genistein     | simvastatin |           | 9.66   | 8.44   | 7.37   | 1.01 | 0.99 | 1.04 | 6 |
| 5 | 11 | SKI-II          | mevastatin    |               |               |               |             |           | 26.89  | 34.24  | 17.95  | 1.01 | 1.04 | 1.02 | 2 |
| 5 | 12 | SIH             | tempol        | SR 11302      | SKI-II        | Y27632 dihy   |             |           | 36.78  | 38.44  | 12.49  | 0.98 | 1.03 | 0.95 | 5 |
| 5 | 13 | apocynin        | PD98059       | SR 11302      | genistein     |               |             |           | 126.67 | 116.96 | 100.00 | 0.95 | 1.03 | 1.03 | 4 |
| 5 | 14 | SIH             | PD98059       | SKI-II        | genistein     |               |             |           | 30.81  | 35.58  | 26.78  | 1.00 | 1.04 | 1.04 | 4 |
| 5 | 15 | VK-28           | desferrioxam  | SB203580      | SR 11302      | Y27632 dihy   |             |           | 12.39  | 12.24  | 9.11   | 0.99 | 1.05 | 1.01 | 5 |
| 5 | 16 | SKI-II          |               |               |               |               |             |           | 29.41  | 33.35  | 15.89  | 1.00 | 1.03 | 0.98 | 1 |
| 5 | 17 | SKI-II          | di-methyl spl |               |               |               |             |           | 22.94  | 31.59  | 21.89  | 0.98 | 1.06 | 1.05 | 2 |
| 5 | 18 | LY294002 hy     | di-methyl spl |               |               |               |             |           | 149.98 | 122.44 | 74.77  | 1.00 | 1.02 | 0.97 | 2 |
| 5 | 19 | TPEN            | SKI-II        |               |               |               |             |           | 34.03  | 42.73  | 44.41  | 1.05 | 1.01 | 1.08 | 2 |
| 5 | 20 | U0126           | SR 11302      | EGCG          |               |               |             |           | 151.80 | 129.18 | 139.91 | 1.00 | 1.03 | 1.01 | 3 |
| 5 | 21 | SIH             | apocynin      | SB203580      |               |               |             |           | 11.59  | 14.37  | 10.70  | 0.99 | 1.02 | 1.00 | 3 |
| 5 | 22 | tempol          |               |               |               |               |             |           | 105.71 | 139.67 | 103.44 | 0.98 | 1.03 | 0.96 | 1 |
| 5 | 23 | tempol          | SR 11302      | SKI-II        | di-methyl spl | EGCG          |             |           | 23.67  | 27.96  | 25.87  | 1.02 | 1.04 | 1.07 | 5 |
| 5 | 24 | wortmannin      | PD98059       | di-methyl spl |               |               |             |           | 87.12  | 90.33  | 69.38  | 0.99 | 1.06 | 1.00 | 3 |
| 5 | 25 | DMSO            |               |               |               |               |             |           | 104.04 | 146.92 | 94.82  | 0.96 | 0.91 | 0.93 | 0 |
| 5 | 26 | tempol          |               |               |               |               |             |           | 101.45 | 122.88 | 122.55 | 0.97 | 1.00 | 0.98 | 1 |
| 5 | 27 | SKI-II          |               |               |               |               |             |           | 30.17  | 24.83  | 16.07  | 0.96 | 0.98 | 0.94 | 1 |
| 5 | 28 | SB203580        | SKI-II        |               |               |               |             |           | 6.41   | 6.12   | 4.63   | 1.00 | 0.99 | 0.96 | 2 |
| 5 | 29 | alpha-tocoph    | mevastatin    |               |               |               |             |           | 100.36 | 77.72  | 118.70 | 0.99 | 1.01 | 0.99 | 2 |
| 5 | 30 | SIH             | SB203580      | PD98059       | SKI-II        |               |             |           | 5.97   | 6.76   | 4.63   | 0.99 | 1.05 | 0.95 | 4 |
| 5 | 31 | SIH             | SB203580      | SKI-II        | Y27632 dihy   |               |             |           | 6.30   | 6.76   | 5.31   | 0.97 | 0.99 | 1.01 | 4 |
| 5 | 32 | DMSO            |               |               |               |               |             |           | 83.39  | 132.18 | 113.64 | 0.97 | 1.03 | 0.99 | 0 |
| 5 | 33 | SIH             | SKI-II        |               |               |               |             |           | 25.27  | 26.96  | 32.50  | 0.99 | 0.97 | 1.09 | 2 |
| 5 | 34 | tempol          | SB203580      | PDTC          | simvastatin   |               |             |           | 9.10   | 10.39  | 8.50   | 1.01 | 1.09 | 1.03 | 4 |
| 5 | 35 | desferrioxam    | alpha-tocoph  |               |               |               |             |           | 86.95  | 92.65  | 107.48 | 0.95 | 1.01 | 1.04 | 2 |
| 5 | 36 | wortmannin      | SB203580      | simvastatin   |               |               |             |           | 10.22  | 12.50  | 8.93   | 0.98 | 0.98 | 0.96 | 3 |
| 5 | 37 | tempol          | SKI-II        |               |               |               |             |           | 22.57  | 34.24  | 26.68  | 0.92 | 1.00 | 1.02 | 2 |
| 5 | 38 | SIH             | SB203580      | PDTC          |               |               |             |           | 9.43   | 8.70   | 7.89   | 0.94 | 1.01 | 0.98 | 3 |

|   |    |                |                |             |             |             |             |             |        |        |        |      |      |      |   |
|---|----|----------------|----------------|-------------|-------------|-------------|-------------|-------------|--------|--------|--------|------|------|------|---|
| 5 | 39 | SIH            | SB203580       | SP600125    | SKI-II      |             |             |             | 9.66   | 8.57   | 6.93   | 1.00 | 0.98 | 1.01 | 4 |
| 5 | 40 | rotenone       | wortmannin     |             |             |             |             |             | 55.95  | 33.79  | 36.93  | 1.04 | 1.00 | 1.11 | 2 |
| 5 | 41 | rotenone       | PD98059        | SKI-II      |             |             |             |             | 17.53  | 18.56  | 16.45  | 1.06 | 1.05 | 1.13 | 3 |
| 5 | 42 | TPEN           | wortmannin     | SB203580    |             |             |             |             | 10.00  | 11.58  | 13.22  | 0.97 | 1.00 | 1.05 | 3 |
| 5 | 43 | alpha-tocoph   | tempol         | U0126       | PDTC        |             |             |             | 46.68  | 67.72  | 80.82  | 0.99 | 1.06 | 0.98 | 4 |
| 5 | 44 | SB203580       | SKI-II         |             |             |             |             |             | 5.53   | 5.99   | 5.31   | 1.02 | 1.09 | 1.00 | 2 |
| 5 | 45 | apocynin       | SR 11302       | genistein   |             |             |             |             | 47.10  | 65.12  | 118.13 | 0.99 | 0.97 | 1.08 | 3 |
| 5 | 46 | VK-28          |                |             |             |             |             |             | 55.08  | 75.72  | 96.63  | 0.98 | 1.02 | 1.01 | 1 |
| 5 | 47 | SIH            | SKI-II         |             |             |             |             |             | 19.67  | 33.06  | 21.99  | 0.94 | 1.02 | 1.02 | 2 |
| 5 | 48 | PDTC           | NSC23766 (     |             |             |             |             |             | 46.40  | 44.44  | 76.52  | 0.96 | 0.97 | 0.99 | 2 |
| 5 | 49 | SIH            | SB203580       |             |             |             |             |             | 8.87   | 7.92   | 11.95  | 1.01 | 0.96 | 1.10 | 2 |
| 5 | 50 | wortmannin     | SKI-II         | genistein   | Y27632 dihy |             |             |             | 26.64  | 16.39  | 16.35  | 0.97 | 0.96 | 1.04 | 4 |
| 6 | 1  | wortmannin     | SB203580       | SKI-II      |             |             |             |             | 0.00   | 4.87   | 2.66   | 1.06 | 1.04 | 1.03 | 3 |
| 6 | 2  | N-acetyl cysti | NSC23766 (     |             |             |             |             |             | 119.95 | 133.27 | 112.91 | 1.02 | 1.06 | 0.96 | 2 |
| 6 | 3  | IKK inhibitor  | SKI-II         |             |             |             |             |             | 17.10  | 27.56  | 11.38  | 1.08 | 1.05 | 0.96 | 2 |
| 6 | 4  | desferrioxam   | tempol         | wortmannin  | SB203580    | PD98059     | Y27632 dihy | simvastatin | 0.00   | 2.97   | 2.66   | 1.27 | 1.23 | 1.18 | 7 |
| 6 | 5  | SIH            | alpha-tocoph   | SB203580    | PDTC        | SKI-II      |             |             | 3.10   | 4.39   | 0.00   | 0.98 | 1.07 | 0.89 | 5 |
| 6 | 6  | SIH            | SB203580       | SP600125    | SKI-II      |             |             |             | 6.78   | 6.46   | 5.02   | 0.93 | 1.00 | 0.86 | 4 |
| 6 | 7  | desferrioxam   | tempol         | LY294002 h  | Y27632 dihy |             |             |             | 132.94 | 159.43 | 95.96  | 0.96 | 1.06 | 0.93 | 4 |
| 6 | 8  | wortmannin     | SB203580       | PD98059     | simvastatin |             |             |             | 0.00   | 0.00   | 2.39   | 1.26 | 1.29 | 1.26 | 4 |
| 6 | 9  | SB203580       | simvastatin    |             |             |             |             |             | 5.30   | 8.06   | 6.56   | 1.00 | 1.04 | 0.93 | 2 |
| 6 | 10 | N-acetyl cysti | NSC23766 (     |             |             |             |             |             | 74.83  | 97.98  | 55.48  | 1.04 | 1.02 | 0.93 | 2 |
| 6 | 11 | SIH            | alpha-tocoph   | SB203580    | SP600125    | simvastatin |             |             | 7.52   | 14.39  | 7.82   | 1.04 | 1.05 | 0.99 | 5 |
| 6 | 12 | VK-28          |                |             |             |             |             |             | 131.21 | 137.57 | 122.23 | 1.01 | 1.01 | 1.00 | 1 |
| 6 | 13 | wortmannin     | SKI-II         | simvastatin |             |             |             |             | 16.64  | 18.20  | 7.54   | 1.02 | 1.03 | 0.94 | 3 |
| 6 | 14 | SB203580       |                |             |             |             |             |             | 7.52   | 7.89   | 8.81   | 0.99 | 1.00 | 0.98 | 1 |
| 6 | 15 | desferrioxam   | SKI-II         |             |             |             |             |             | 25.01  | 27.21  | 14.26  | 1.03 | 1.08 | 0.92 | 2 |
| 6 | 16 | SIH            | desferrioxar   | tempol      | SB203580    |             |             |             | 7.08   | 7.09   | 5.30   | 0.99 | 0.98 | 0.91 | 4 |
| 6 | 17 | SB203580       | di-methyl spl  | Y27632 dihy |             |             |             |             | 3.98   | 5.18   | 5.16   | 0.97 | 1.04 | 0.93 | 3 |
| 6 | 18 | VK-28          | tempol         |             |             |             |             |             | 103.08 | 83.38  | 95.16  | 0.93 | 0.97 | 1.04 | 2 |
| 6 | 19 | SIH            | alpha-tocoph   | SB203580    | PDTC        | SKI-II      |             |             | 2.96   | 3.60   | 2.25   | 0.99 | 1.04 | 1.00 | 5 |
| 6 | 20 | SIH            | LY294002 h     | SB203580    | PDTC        |             |             |             | 9.62   | 9.83   | 7.12   | 1.03 | 1.03 | 0.96 | 4 |
| 6 | 21 | tempol         | wortmannin     |             |             |             |             |             | 98.69  | 95.31  | 118.73 | 1.01 | 0.98 | 1.06 | 2 |
| 6 | 22 | alpha-tocoph   | SB203580       | genistein   |             |             |             |             | 10.22  | 19.54  | 10.23  | 1.01 | 1.02 | 0.96 | 3 |
| 6 | 23 | SIH            | tempol         | SR 11302    | SKI-II      |             |             |             | 24.37  | 32.63  | 12.82  | 1.00 | 1.01 | 0.91 | 4 |
| 6 | 24 | VK-28          | SP600125       |             |             |             |             |             | 96.31  | 102.71 | 95.76  | 1.00 | 0.98 | 0.98 | 2 |
| 6 | 25 | SIH            | SB203580       | PDTC        |             |             |             |             | 7.97   | 8.22   | 4.88   | 1.05 | 1.02 | 0.93 | 3 |
| 6 | 26 | rotenone       | IRAK 1         |             | SKI-II      |             |             |             | 9.32   | 12.10  | 5.58   | 1.09 | 1.05 | 0.97 | 3 |
| 6 | 27 | SIH            | tempol         | SR 11302    | PDTC        | SKI-II      |             |             | 23.56  | 29.99  | 12.67  | 0.99 | 1.04 | 0.92 | 5 |
| 6 | 28 | SIH            | SB203580       |             |             |             |             |             | 6.48   | 8.22   | 8.39   | 0.94 | 0.95 | 1.09 | 2 |
| 6 | 29 | SB203580       | SKI-II         | simvastatin |             |             |             |             | 0.00   | 4.55   | 0.00   | 1.01 | 1.03 | 1.03 | 3 |
| 6 | 30 | SIH            | tempol         | wortmannin  | SKI-II      |             |             |             | 7.23   | 9.83   | 7.12   | 1.52 | 1.52 | 1.26 | 4 |
| 6 | 31 | SKI-II         | di-methyl spl  |             |             |             |             |             | 9.92   | 32.98  | 26.01  | 1.03 | 1.05 | 1.01 | 2 |
| 6 | 32 | tempol         | SKI-II         | NSC23766 (  |             |             |             |             | 15.09  | 17.04  | 17.33  | 1.04 | 1.03 | 0.96 | 3 |
| 6 | 33 | apocynin       | SKI-II         |             |             |             |             |             | 23.72  | 22.41  | 17.62  | 1.00 | 1.01 | 0.99 | 2 |
| 6 | 34 | VK-28          | SIH            | tempol      | diphenylene | SB203580    | SKI-II      |             | 0.00   | 3.13   | 2.25   | 1.07 | 1.11 | 0.97 | 6 |
| 6 | 35 | SIH            | alpha-tocoph   | tempol      |             |             |             |             | 102.63 | 83.81  | 59.98  | 0.92 | 0.96 | 0.94 | 3 |
| 6 | 36 | wortmannin     | SKI-II         |             |             |             |             |             | 22.77  | 37.26  | 20.43  | 0.94 | 1.05 | 0.91 | 2 |
| 6 | 37 | wortmannin     | SB203580       | mevastatin  | simvastatin |             |             |             | 0.00   | 2.97   | 4.60   | 1.18 | 1.15 | 1.20 | 4 |
| 6 | 38 | desferrioxam   | tempol         | SB203580    |             |             |             |             | 6.93   | 9.50   | 5.44   | 1.00 | 0.99 | 0.94 | 3 |
| 6 | 39 | SIH            | SB203580       | SR 11302    | SKI-II      |             |             |             | 2.52   | 14.23  | 6.56   | 1.01 | 1.05 | 1.04 | 4 |
| 6 | 40 | tempol         | SP600125       | SR 11302    | PDTC        | NSC23766 (  |             |             | 83.29  | 75.22  | 43.72  | 1.01 | 1.02 | 0.99 | 5 |
| 6 | 41 | rotenone       | NSC23766 (     |             |             |             |             |             | 29.40  | 37.80  | 36.77  | 1.07 | 1.05 | 1.14 | 2 |
| 6 | 42 | SIH            | desferrioxar   | tempol      | SB203580    | SR 11302    | PDTC        |             | 7.23   | 6.77   | 8.39   | 0.96 | 0.99 | 0.99 | 6 |
| 6 | 43 | SIH            | tempol         | SB203580    | SR 11302    | genistein   |             |             | 6.04   | 8.54   | 8.39   | 0.99 | 0.98 | 0.94 | 5 |
| 6 | 44 | tempol         | SB203580       | PDTC        | Y27632 dihy | simvastatin |             |             | 4.72   | 7.74   | 7.68   | 0.99 | 0.99 | 0.96 | 5 |
| 6 | 45 | SIH            | N-acetyl cysti | SB203580    | U0126       | SKI-II      |             |             | 0.00   | 3.45   | 0.00   | 1.12 | 1.11 | 0.97 | 5 |
| 6 | 46 | SKI-II         | Y27632 dihy    | EGCG        |             |             |             |             | 14.17  | 26.00  | 15.42  | 0.99 | 0.97 | 0.93 | 3 |
| 6 | 47 | SB203580       | U0126          | PDTC        | simvastatin |             |             |             | 2.38   | 0.00   | 0.00   | 1.02 | 0.96 | 1.05 | 4 |
| 6 | 48 | LY294002 hy    | wortmannin     | SKI-II      |             |             |             |             | 35.21  | 33.69  | 18.51  | 1.03 | 1.01 | 0.98 | 3 |





|    |    |                 |               |               |             |               |               |             |        |        |        |      |      |      |   |
|----|----|-----------------|---------------|---------------|-------------|---------------|---------------|-------------|--------|--------|--------|------|------|------|---|
| 9  | 19 | tempol          | SB203580      | PD98059       | SR 11302    |               |               |             | 0.00   | 0.00   | 0.00   | 1.09 | 1.07 | 1.10 | 4 |
| 9  | 20 | SB203580        |               |               |             |               |               |             | 0.00   | 0.00   | 0.00   | 1.00 | 0.99 | 0.95 | 1 |
| 9  | 21 | SB203580        | Y27632 dihy   |               |             |               |               |             | 0.00   | 0.00   | 0.00   | 1.01 | 1.04 | 1.00 | 2 |
| 9  | 22 | apocynin        | SB203580      | SP600125      | SKI-II      | mevastatin    |               |             | 0.00   | 0.00   | 0.00   | 1.00 | 1.05 | 1.01 | 5 |
| 9  | 23 | SB203580        |               |               |             |               |               |             | 0.00   | 0.00   | 0.00   | 0.98 | 1.08 | 0.99 | 1 |
| 9  | 24 | TPEN            | tempol        | U0126         |             |               |               |             | 34.40  | 40.12  | 27.02  | 0.98 | 0.98 | 0.91 | 3 |
| 9  | 25 | SP600125        | SKI-II        | genistein     |             |               |               |             | 57.99  | 59.30  | 35.40  | 1.03 | 1.02 | 0.88 | 3 |
| 9  | 26 | SIH             | alpha-tocopt  | SB203580      | EGCG        |               |               |             | 0.00   | 0.00   | 0.00   | 1.02 | 0.99 | 1.00 | 4 |
| 9  | 27 | genistein       |               |               |             |               |               |             | 85.13  | 88.71  | 62.02  | 1.00 | 0.97 | 0.90 | 1 |
| 9  | 28 | U0126           | genistein     |               |             |               |               |             | 44.85  | 34.15  | 33.02  | 0.99 | 0.94 | 0.94 | 2 |
| 9  | 29 | N-acetyl cyst   | wortmannin    | SB203580      | SKI-II      | di-methyl spl |               |             | 0.00   | 0.00   | 0.00   | 1.43 | 1.42 | 1.23 | 5 |
| 9  | 30 | SIH             | LY294002 h    | PD98059       | IRAK 1      | simvastatin   |               |             | 17.46  | 36.02  | 34.08  | 1.12 | 1.10 | 1.14 | 5 |
| 9  | 31 | SB203580        |               |               |             |               |               |             | 0.00   | 0.00   | 0.00   | 0.94 | 1.00 | 0.92 | 1 |
| 9  | 32 | desferrioxam    | alpha-tocopt  | wortmannin    | SKI-II      | Y27632 dihy   |               |             | 0.00   | 0.00   | 0.00   | 1.31 | 1.30 | 1.37 | 5 |
| 9  | 33 | SB203580        | di-methyl spl | Y27632 dihy   |             |               |               |             | 0.00   | 0.00   | 0.00   | 0.99 | 1.02 | 0.98 | 3 |
| 9  | 34 | apocynin        |               |               |             |               |               |             | 86.53  | 123.56 | 131.95 | 0.99 | 1.08 | 0.97 | 1 |
| 9  | 35 | SB203580        | SR 11302      |               |             |               |               |             | 0.00   | 0.00   | 0.00   | 0.98 | 0.98 | 0.90 | 2 |
| 9  | 36 | tempol          | SB203580      | SKI-II        | simvastatin |               |               |             | 0.00   | 0.00   | 0.00   | 1.05 | 1.05 | 0.90 | 4 |
| 9  | 37 | wortmannin      | SKI-II        | Y27632 dihy   |             |               |               |             | 0.00   | 0.00   | 0.00   | 1.41 | 1.18 | 1.38 | 3 |
| 9  | 38 | SIH             | SB203580      |               |             |               |               |             | 0.00   | 0.00   | 0.00   | 1.00 | 1.00 | 0.92 | 2 |
| 9  | 39 | TPEN            | alpha-tocopt  | SB203580      | Y27632 dihy |               |               |             | 0.00   | 0.00   | 0.00   | 0.96 | 0.94 | 0.95 | 4 |
| 9  | 40 | SKI-II          | NSC23766 (    | EGCG          |             |               |               |             | 16.37  | 21.27  | 9.93   | 0.98 | 1.05 | 0.94 | 3 |
| 9  | 41 | IKK inhibitor i | EGCG          |               |             |               |               |             | 39.81  | 70.12  | 70.81  | 1.12 | 1.13 | 1.12 | 2 |
| 9  | 42 | diphenylene i   | SB203580      | IKK inhibitor | SKI-II      | simvastatin   |               |             | 0.00   | 0.00   | 0.00   | 1.11 | 1.19 | 0.95 | 5 |
| 9  | 43 | SIH             | SB203580      | U0126         | SP600125    |               |               |             | 0.00   | 0.00   | 0.00   | 1.06 | 1.06 | 1.05 | 4 |
| 9  | 44 | apocynin        | SB203580      | IRAK 1        |             |               |               |             | 0.00   | 0.00   | 0.00   | 1.12 | 1.12 | 1.05 | 3 |
| 9  | 45 | SB203580        | di-methyl spl |               |             |               |               |             | 0.00   | 0.00   | 0.00   | 1.02 | 0.99 | 0.92 | 2 |
| 9  | 46 | genistein       | Y27632 dihy   |               |             |               |               |             | 87.65  | 118.90 | 76.51  | 1.00 | 1.03 | 0.92 | 2 |
| 9  | 47 | SIH             | SB203580      | IRAK 1        |             | di-methyl spl | genistein     |             | 0.00   | 0.00   | 0.00   | 1.08 | 1.05 | 0.92 | 5 |
| 9  | 48 | alpha-tocoph    | rotenone      | SB203580      | IRAK 1      | SKI-II        | di-methyl spl | simvastatin | 0.00   | 0.00   | 0.00   | 1.13 | 1.11 | 1.12 | 7 |
| 9  | 49 | N-acetyl cyst   | tempol        | PDTC          | genistein   | simvastatin   |               |             | 72.05  | 67.39  | 59.14  | 0.98 | 0.97 | 0.98 | 5 |
| 9  | 50 | rotenone        | NSC23766 (    |               |             |               |               |             | 25.46  | 46.84  | 19.11  | 1.03 | 1.09 | 1.02 | 2 |
| 10 | 1  | SIH             | SB203580      |               |             |               |               |             | 9.23   | 11.38  | 11.83  | 0.98 | 1.02 | 1.03 | 2 |
| 10 | 2  | SB203580        | SKI-II        | di-methyl spl |             |               |               |             | 2.97   | 5.47   | 4.32   | 1.00 | 1.06 | 1.02 | 3 |
| 10 | 3  | SB203580        | U0126         |               |             |               |               |             | 3.42   | 4.47   | 5.01   | 1.00 | 0.99 | 1.04 | 2 |
| 10 | 4  | SB203580        | PDTC          | di-methyl spl | NSC23766 (  |               |               |             | 7.84   | 8.99   | 7.82   | 1.03 | 1.06 | 1.00 | 4 |
| 10 | 5  | SB203580        |               |               |             |               |               |             | 11.57  | 12.58  | 9.67   | 1.01 | 1.05 | 1.01 | 1 |
| 10 | 6  | TPEN            | diphenylene   | Y27632 dihy   |             |               |               |             | 23.43  | 39.88  | 35.80  | 1.04 | 1.09 | 1.06 | 3 |
| 10 | 7  | SIH             | SB203580      | Y27632 dihy   |             |               |               |             | 9.69   | 10.86  | 9.67   | 1.00 | 1.05 | 0.99 | 3 |
| 10 | 8  | SIH             | SB203580      | NSC23766 (    |             |               |               |             | 9.00   | 8.49   | 6.98   | 0.99 | 1.03 | 0.96 | 3 |
| 10 | 9  | SB203580        | SR 11302      |               |             |               |               |             | 9.92   | 10.18  | 7.26   | 0.95 | 0.99 | 0.93 | 2 |
| 10 | 10 | TPEN            | alpha-tocopt  | SB203580      | PD98059     | Y27632 dihy   |               |             | 6.01   | 6.97   | 7.97   | 0.96 | 0.98 | 1.02 | 5 |
| 10 | 11 | SB203580        |               |               |             |               |               |             | 9.23   | 14.48  | 9.67   | 0.99 | 1.03 | 0.96 | 1 |
| 10 | 12 | SB203580        | U0126         | IRAK 1        | genistein   | Y27632 dihy   | EGCG          | Melatonin   | 0.00   | 0.00   | 3.34   | 1.02 | 1.02 | 1.05 | 7 |
| 10 | 13 | PD98059         | Y27632 dihy   | EGCG          | Melatonin   |               |               |             | 109.94 | 142.32 | 135.89 | 0.98 | 1.07 | 1.02 | 4 |
| 10 | 14 | TPEN            | alpha-tocopt  | SB203580      | SP600125    | Y27632 dihy   |               |             | 10.98  | 8.15   | 8.96   | 0.95 | 1.00 | 0.99 | 5 |
| 10 | 15 | alpha-tocoph    | apocynin      | IKK inhibitor |             |               |               |             | 22.79  | 41.04  | 37.41  | 0.97 | 1.06 | 1.01 | 3 |
| 10 | 16 | rotenone        | SB203580      | di-methyl spl |             |               |               |             | 3.76   | 5.80   | 3.90   | 1.07 | 1.11 | 1.04 | 3 |
| 10 | 17 | genistein       |               |               |             |               |               |             | 82.38  | 143.45 | 124.22 | 0.96 | 1.04 | 1.01 | 1 |
| 10 | 18 | SR 11302        | Melatonin     |               |             |               |               |             | 88.68  | 70.37  | 55.36  | 1.00 | 1.00 | 0.93 | 2 |
| 10 | 19 | alpha-tocoph    | SB203580      |               |             |               |               |             | 8.65   | 12.58  | 9.25   | 0.98 | 1.03 | 0.97 | 2 |
| 10 | 20 | SB203580        | di-methyl spl | Y27632 dihy   |             |               |               |             | 8.65   | 8.32   | 7.26   | 0.97 | 0.97 | 0.93 | 3 |
| 10 | 21 | LY294002 hy     | SB203580      | di-methyl spl |             |               |               |             | 12.87  | 15.52  | 10.82  | 0.96 | 0.98 | 0.93 | 3 |
| 10 | 22 | TPEN            | alpha-tocopt  | Y27632 dihy   |             |               |               |             | 55.66  | 53.75  | 74.05  | 0.97 | 0.99 | 1.00 | 3 |
| 10 | 23 | TPEN            | SR 11302      | genistein     |             |               |               |             | 125.38 | 169.99 | 75.97  | 0.99 | 1.06 | 0.95 | 3 |
| 10 | 24 | TPEN            | diphenylene   | SB203580      | genistein   |               |               |             | 3.98   | 5.63   | 6.70   | 1.03 | 1.10 | 1.05 | 4 |
| 10 | 25 | SIH             | TPEN          | SB203580      |             |               |               |             | 10.39  | 12.92  | 12.41  | 0.99 | 1.05 | 1.02 | 3 |
| 10 | 26 | TPEN            | alpha-tocopt  | SB203580      | Y27632 dihy |               |               |             | 7.50   | 10.86  | 7.12   | 1.01 | 1.03 | 0.98 | 4 |
| 10 | 27 | alpha-tocoph    | U0126         |               |             |               |               |             | 47.71  | 86.05  | 76.93  | 0.97 | 1.02 | 1.01 | 2 |
| 10 | 28 | SB203580        |               |               |             |               |               |             | 8.88   | 8.83   | 6.70   | 1.02 | 1.01 | 0.95 | 1 |



|    |    |               |               |               |               |               |        |        |        |      |      |      |   |
|----|----|---------------|---------------|---------------|---------------|---------------|--------|--------|--------|------|------|------|---|
| 10 | 29 | SB203580      | genistein     |               |               |               | 10.16  | 15.69  | 11.68  | 1.02 | 1.03 | 1.01 | 2 |
| 10 | 30 | SIH           | SB203580      | IKK inhibitor |               |               | 3.20   | 4.30   | 3.21   | 0.96 | 0.99 | 0.92 | 3 |
| 10 | 31 | TPEN          | SB203580      | di-methyl spl | Y27632 dihy   | EGCG          | 7.27   | 8.83   | 6.41   | 0.96 | 0.96 | 0.94 | 5 |
| 10 | 32 | di-methyl spl |               |               |               |               | 136.40 | 170.29 | 86.99  | 1.01 | 1.04 | 0.97 | 1 |
| 10 | 33 | EGCG          |               |               |               |               | 105.90 | 105.38 | 123.99 | 1.00 | 1.02 | 1.01 | 1 |
| 10 | 34 | TPEN          | SB203580      | SR 11302      | PDTC          | Y27632 dihy   | 8.65   | 13.44  | 11.83  | 0.97 | 1.07 | 1.01 | 5 |
| 10 | 35 | SB203580      | di-methyl spl | genistein     |               |               | 10.51  | 13.96  | 9.67   | 1.00 | 1.04 | 0.98 | 3 |
| 10 | 36 | SB203580      | SP600125      | genistein     | Y27632 dihy   | simvastatin   | 8.65   | 13.44  | 12.55  | 0.95 | 1.06 | 1.00 | 5 |
| 10 | 37 | genistein     |               |               |               |               | 118.25 | 156.73 | 81.61  | 1.01 | 1.07 | 0.97 | 1 |
| 10 | 38 | SB203580      | U0126         | di-methyl spl | simvastatin   |               | 2.53   | 4.14   | 3.76   | 1.00 | 1.04 | 1.03 | 4 |
| 10 | 39 | VK-28         | SB203580      | Melatonin     |               |               | 8.30   | 11.03  | 6.27   | 0.98 | 1.02 | 0.93 | 3 |
| 10 | 40 | SIH           | apocynin      | wortmannin    | SKI-II        |               | 4.43   | 7.31   | 5.01   | 1.09 | 1.14 | 1.08 | 4 |
| 10 | 41 | SIH           | SB203580      |               |               |               | 7.15   | 10.69  | 6.70   | 0.95 | 0.96 | 0.92 | 2 |
| 10 | 42 | SIH           | SB203580      |               |               |               | 9.23   | 8.83   | 10.53  | 1.02 | 1.02 | 1.07 | 2 |
| 10 | 43 | SB203580      | SR 11302      |               |               |               | 10.27  | 15.00  | 8.39   | 0.98 | 1.06 | 0.97 | 2 |
| 10 | 44 | DMSO          |               |               |               |               | 109.94 | 154.67 | 117.11 | 1.00 | 1.07 | 1.03 | 0 |
| 10 | 45 | alpha-tocoph  | wortmannin    | SB203580      | Y27632 dihy   |               | 4.77   | 5.13   | 3.48   | 1.01 | 1.06 | 1.00 | 4 |
| 10 | 46 | wortmannin    | SB203580      | di-methyl spl | NSC23766 (    |               | 4.09   | 5.63   | 3.48   | 1.09 | 1.14 | 1.07 | 4 |
| 10 | 47 | desferrioxam  | alpha-tocoph  | SB203580      | Y27632 dihy   |               | 7.96   | 9.16   | 6.84   | 0.98 | 1.03 | 0.95 | 4 |
| 10 | 48 | SIH           | genistein     |               |               |               | 73.88  | 131.82 | 105.36 | 1.03 | 1.07 | 1.04 | 2 |
| 10 | 49 | SB203580      | PDTC          | di-methyl spl |               |               | 7.61   | 12.41  | 6.55   | 1.01 | 1.03 | 0.98 | 3 |
| 10 | 50 | TPEN          | alpha-tocoph  | SB203580      | Y27632 dihy   |               | 5.67   | 9.16   | 5.29   | 1.08 | 1.03 | 0.95 | 4 |
| 11 | 1  | rotenone      |               |               |               |               | 10.89  | 36.18  | 36.16  | 0.94 | 0.99 | 1.04 | 1 |
| 11 | 2  | genistein     |               |               |               |               | 116.62 | 123.79 | 81.31  | 0.99 | 0.99 | 1.00 | 1 |
| 11 | 3  | VK-28         |               |               |               |               | 92.99  | 58.81  | 88.46  | 1.02 | 0.94 | 0.99 | 1 |
| 11 | 4  | SB203580      | di-methyl spl | Y27632 dihy   |               |               | 0.00   | 8.69   | 7.01   | 0.90 | 1.05 | 0.99 | 3 |
| 11 | 5  | N-acetyl cyst |               |               |               |               | 37.72  | 68.07  | 103.46 | 0.92 | 0.96 | 1.03 | 1 |
| 11 | 6  | VK-28         | SIH           | SB203580      | IKK inhibitor |               | 0.00   | 0.00   | 4.43   | 0.94 | 0.95 | 1.01 | 4 |
| 11 | 7  | IKK inhibitor |               |               |               |               | 33.87  | 17.73  | 19.32  | 1.00 | 0.97 | 0.94 | 1 |
| 11 | 8  | IRAK 1        |               | SKI-II        |               |               | 0.00   | 0.00   | 5.90   | 0.93 | 0.95 | 1.00 | 2 |
| 11 | 9  | SKI-II        |               |               |               |               | 10.89  | 21.21  | 11.08  | 0.99 | 1.01 | 0.93 | 1 |
| 11 | 10 | LY294002 hy   | SB203580      |               |               |               | 5.98   | 10.40  | 7.75   | 0.93 | 1.02 | 0.95 | 2 |
| 11 | 11 | SIH           | TPEN          | SB203580      | SP600125      | IKK inhibitor | 0.00   | 5.28   | 4.43   | 1.01 | 1.02 | 0.96 | 5 |
| 11 | 12 | VK-28         | TPEN          | SB203580      | SR 11302      | genistein     | 5.98   | 14.70  | 14.81  | 0.89 | 0.93 | 1.04 | 5 |
| 11 | 13 | SP600125      |               |               |               |               | 95.80  | 113.29 | 87.62  | 0.98 | 0.98 | 0.99 | 1 |
| 11 | 14 | alpha-tocoph  | PDTC          | mevastatin    |               |               | 64.34  | 50.58  | 59.51  | 1.00 | 0.94 | 0.99 | 3 |
| 11 | 15 | SB203580      |               |               |               |               | 5.98   | 10.40  | 10.71  | 0.91 | 0.95 | 1.01 | 1 |
| 11 | 16 | N-acetyl cyst | SB203580      | U0126         |               |               | 0.00   | 0.00   | 0.00   | 0.95 | 1.00 | 1.02 | 3 |
| 11 | 17 | SIH           | SB203580      | IKK inhibitor | NSC23766 (    |               | 0.00   | 0.00   | 0.00   | 0.97 | 0.95 | 0.97 | 4 |
| 11 | 18 | SIH           | SB203580      | genistein     |               |               | 0.00   | 6.13   | 9.97   | 0.93 | 0.94 | 0.98 | 3 |
| 11 | 19 | Y27632 dihy   |               |               |               |               | 57.25  | 68.07  | 78.80  | 0.95 | 0.99 | 0.95 | 1 |
| 11 | 20 | N-acetyl cyst | SB203580      |               |               |               | 5.98   | 13.41  | 13.32  | 0.90 | 0.93 | 1.02 | 2 |
| 11 | 21 | VK-28         | IRAK 1        |               | Y27632 dihy   |               | 33.45  | 35.73  | 22.35  | 0.96 | 0.99 | 0.99 | 3 |
| 11 | 22 | SB203580      | PDTC          | mevastatin    |               |               | 7.61   | 8.26   | 8.49   | 1.00 | 0.93 | 0.99 | 3 |
| 11 | 23 | diphenylene i |               |               |               |               | 12.53  | 43.79  | 29.98  | 0.96 | 1.05 | 0.97 | 1 |
| 11 | 24 | TPEN          |               |               |               |               | 61.23  | 86.48  | 117.07 | 0.95 | 0.97 | 1.00 | 1 |
| 11 | 25 | EGCG          |               |               |               |               | 32.17  | 59.26  | 98.71  | 0.89 | 0.94 | 1.01 | 1 |
| 11 | 26 | alpha-tocoph  |               |               |               |               | 94.86  | 58.81  | 77.55  | 0.96 | 0.94 | 0.92 | 1 |
| 11 | 27 | SIH           |               |               |               |               | 33.02  | 50.58  | 77.13  | 0.92 | 0.95 | 0.99 | 1 |
| 11 | 28 | alpha-tocoph  |               |               |               |               | 60.79  | 76.04  | 64.38  | 0.96 | 0.99 | 1.01 | 1 |
| 11 | 29 | SB203580      | PD98059       | SR 11302      | di-methyl spl |               | 0.00   | 0.00   | 0.00   | 0.92 | 0.99 | 0.95 | 4 |
| 11 | 30 | wortmannin    |               |               |               |               | 20.82  | 27.77  | 21.59  | 1.06 | 1.05 | 1.08 | 1 |
| 11 | 31 | tempol        |               |               |               |               | 57.69  | 95.15  | 112.65 | 0.91 | 0.94 | 1.06 | 1 |
| 11 | 32 | IKK inhibitor |               |               |               |               | 48.49  | 50.58  | 37.32  | 0.96 | 0.98 | 0.99 | 1 |
| 11 | 33 | desferrioxam  |               |               |               |               | 111.36 | 77.92  | 98.71  | 1.03 | 0.96 | 0.98 | 1 |
| 11 | 34 | wortmannin    | SB203580      | di-methyl spl |               |               | 0.00   | 4.85   | 5.90   | 0.95 | 1.07 | 1.01 | 3 |
| 11 | 35 | di-methyl spl |               |               |               |               | 35.15  | 42.44  | 77.13  | 0.91 | 0.97 | 1.04 | 1 |
| 11 | 36 | SB203580      |               |               |               |               | 8.43   | 9.97   | 11.45  | 0.99 | 1.00 | 0.96 | 1 |
| 11 | 37 | PDTC          |               |               |               |               | 30.48  | 62.03  | 99.57  | 0.89 | 0.96 | 0.98 | 1 |
| 11 | 38 | genistein     |               |               |               |               | 92.99  | 61.57  | 103.03 | 0.96 | 0.97 | 0.95 | 1 |

|    |    |                            |  |        |        |        |      |      |      |   |
|----|----|----------------------------|--|--------|--------|--------|------|------|------|---|
| 11 | 39 | tempol                     |  | 25.00  | 56.97  | 103.90 | 0.89 | 0.96 | 0.96 | 1 |
| 11 | 40 | SR 11302                   |  | 67.46  | 71.80  | 76.71  | 0.98 | 0.99 | 0.95 | 1 |
| 11 | 41 | apocynin                   |  | 35.57  | 81.72  | 70.93  | 0.91 | 1.02 | 0.95 | 1 |
| 11 | 42 | mevastatin                 |  | 28.36  | 74.15  | 76.30  | 0.92 | 0.99 | 1.05 | 1 |
| 11 | 43 | U0126                      |  | 15.83  | 45.14  | 41.22  | 0.93 | 1.03 | 0.99 | 1 |
| 11 | 44 | LY294002 hy                |  | 34.30  | 100.98 | 129.60 | 0.94 | 1.01 | 1.07 | 1 |
| 11 | 45 | simvastatin                |  | 85.61  | 92.72  | 69.70  | 1.03 | 1.06 | 0.99 | 1 |
| 11 | 46 | NSC23766 (f                |  | 29.63  | 61.57  | 70.52  | 0.96 | 0.99 | 0.98 | 1 |
| 11 | 47 | PD98059                    |  | 66.57  | 51.94  | 51.90  | 1.03 | 0.96 | 0.97 | 1 |
| 11 | 48 | SB203580                   |  | 0.00   | 9.12   | 14.07  | 0.93 | 0.98 | 1.00 | 1 |
| 11 | 49 | IRAK 1                     |  | 18.74  | 28.21  | 28.83  | 1.02 | 1.02 | 1.03 | 1 |
| 11 | 50 | Melatonin                  |  | 33.87  | 101.47 | 82.98  | 0.95 | 1.02 | 0.96 | 1 |
| 1  |    | DMSO                       |  | 116.89 | 101.55 | 115.70 | 0.97 | 0.97 | 0.98 |   |
| 1  |    | DMSO                       |  | 126.20 | 134.75 | 127.23 | 1.03 | 1.05 | 1.02 |   |
| 1  |    | DMSO                       |  | 109.11 | 116.40 | 138.89 | 1.00 | 0.98 | 1.00 |   |
| 1  |    | IKK inhibitor (BMS-345541) |  | 0.00   | 21.00  | 17.00  | 1.08 | 1.06 | 1.11 |   |
| 2  |    | DMSO                       |  | 64.27  | 81.86  | 53.41  | 0.94 | 1.01 | 1.02 |   |
| 2  |    | DMSO                       |  | 129.97 | 86.61  | 92.67  | 1.02 | 1.00 | 1.01 |   |
| 2  |    | DMSO                       |  | 116.57 | 131.21 | 125.52 | 0.98 | 1.06 | 0.96 |   |
| 2  |    | DMSO                       |  | 87.99  | 106.75 | 112.29 | 1.01 | 0.96 | 0.97 |   |
| 2  |    | DMSO                       |  | 105.51 | 97.12  | 119.73 | 1.05 | 0.96 | 1.03 |   |
| 2  |    | IKK inhibitor (BMS-345541) |  | 57.97  | 28.74  | 23.74  | 1.19 | NA   | NA   |   |
| 3  |    | DMSO                       |  | 128.48 | 150.32 | 162.43 | 1.06 | 1.05 | 1.07 |   |
| 3  |    | DMSO                       |  | 120.13 | 97.90  | 122.99 | 1.03 | 0.97 | 1.04 |   |
| 3  |    | DMSO                       |  | 78.63  | 84.12  | 56.83  | 1.00 | 1.01 | 0.95 |   |
| 3  |    | DMSO                       |  | 80.44  | 71.25  | 96.87  | 0.96 | 0.96 | 0.97 |   |
| 3  |    | DMSO                       |  | 93.21  | 97.90  | 68.11  | 0.96 | 1.01 | 0.96 |   |
| 3  |    | IKK inhibitor (BMS-345541) |  | 0.00   | 0.00   | 0.00   | 1.65 | 1.45 | 1.91 |   |
| 4  |    | DMSO                       |  | 137.18 | 130.31 | 113.27 | 1.06 | 1.03 | 1.00 |   |
| 4  |    | DMSO                       |  | 132.36 | 118.28 | 115.09 | 1.05 | 0.99 | 0.98 |   |
| 4  |    | DMSO                       |  | 104.05 | 94.44  | 81.93  | 0.97 | 1.00 | 1.03 |   |
| 4  |    | DMSO                       |  | 71.27  | 89.11  | 82.83  | 0.98 | 0.98 | 0.98 |   |
| 4  |    | DMSO                       |  | 72.11  | 74.91  | 111.63 | 0.94 | 1.01 | 1.01 |   |
| 4  |    | IKK inhibitor (BMS-345541) |  | 1.00   | 2.00   | 2.00   | 1.24 | 1.33 | 1.22 |   |
| 5  |    | DMSO                       |  | 159.47 | 121.78 | 92.20  | 1.02 | 1.01 | 1.02 |   |
| 5  |    | DMSO                       |  | 124.41 | 171.31 | 95.81  | 0.99 | 1.03 | 0.93 |   |
| 5  |    | DMSO                       |  | 117.22 | 74.10  | 121.97 | 1.01 | 0.97 | 1.03 |   |
| 5  |    | DMSO                       |  | 64.48  | 75.17  | 84.32  | 0.97 | 1.06 | 0.97 |   |
| 5  |    | DMSO                       |  | 53.20  | 73.20  | 108.73 | 1.01 | 0.93 | 1.05 |   |
| 5  |    | IKK inhibitor (BMS-345541) |  | 5.00   | 5.00   | 4.00   | 1.45 | 1.32 | 1.29 |   |
| 6  |    | DMSO                       |  | 92.68  | 111.47 | 107.84 | 0.99 | 1.01 | 1.01 |   |
| 6  |    | DMSO                       |  | 105.51 | 110.53 | 107.64 | 1.00 | 0.99 | 1.01 |   |
| 6  |    | DMSO                       |  | 104.62 | 99.55  | 75.87  | 1.02 | 1.01 | 0.98 |   |
| 6  |    | DMSO                       |  | 120.88 | 111.94 | 106.38 | 1.01 | 0.99 | 0.99 |   |
| 6  |    | DMSO                       |  | 77.62  | 68.88  | 103.69 | 0.98 | 1.00 | 1.01 |   |
| 6  |    | IKK inhibitor (BMS-345541) |  | 0.00   | 0.00   | 0.00   | 1.51 | 1.55 | 1.56 |   |
| 7  |    | DMSO                       |  | 86.08  | 84.73  | 88.22  | 1.01 | 0.99 | 1.07 |   |
| 7  |    | DMSO                       |  | 107.95 | 121.02 | 92.97  | 1.03 | 1.04 | 0.92 |   |
| 7  |    | DMSO                       |  | 89.45  | 106.42 | 55.54  | 1.00 | 1.00 | 0.92 |   |
| 7  |    | DMSO                       |  | 92.15  | 89.91  | 116.97 | 0.97 | 1.00 | 1.03 |   |
| 7  |    | DMSO                       |  | 124.53 | 98.87  | 150.71 | 0.98 | 0.96 | 1.07 |   |
| 7  |    | IKK inhibitor (BMS-345541) |  | 0.00   | 0.00   | 0.00   | 1.43 | 1.07 | 1.09 |   |
| 8  |    | DMSO                       |  | 111.18 | 145.72 | 109.88 | 0.94 | 1.03 | 1.00 |   |
| 8  |    | DMSO                       |  | 99.34  | 91.98  | 106.02 | 1.02 | 0.98 | 1.02 |   |
| 8  |    | DMSO                       |  | 79.33  | 86.33  | 94.01  | 0.99 | 0.99 | 1.00 |   |
| 8  |    | DMSO                       |  | 89.60  | 93.13  | 94.55  | 1.01 | 0.99 | 0.97 |   |
| 8  |    | DMSO                       |  | 122.52 | 84.62  | 95.09  | 1.05 | 1.01 | 1.01 |   |
| 8  |    | IKK inhibitor (BMS-345541) |  | 12.00  | 11.00  | 11.00  | 1.12 | 1.05 | 1.00 |   |
| 9  |    | DMSO                       |  | 107.41 | 102.60 | 94.22  | 1.00 | 1.06 | 1.03 |   |
| 9  |    | DMSO                       |  | 80.70  | 87.28  | 90.09  | 0.99 | 1.07 | 1.01 |   |

|    |                            |        |        |        |      |      |      |
|----|----------------------------|--------|--------|--------|------|------|------|
| 9  | DMSO                       | 102.34 | 107.45 | 118.34 | 0.97 | 0.95 | 0.97 |
| 9  | DMSO                       | 100.29 | 86.92  | 83.23  | 0.98 | 0.96 | 1.00 |
| 9  | DMSO                       | 110.42 | 116.20 | 115.94 | 1.06 | 0.96 | 0.99 |
| 9  | IKK inhibitor (BMS-345541) | 0.00   | 0.00   | 0.00   | 1.20 | 1.19 | 1.38 |
| 10 | DMSO                       | 145.60 | 98.06  | 87.99  | 1.00 | 1.00 | 0.98 |
| 10 | DMSO                       | 102.73 | 92.35  | 132.02 | 1.09 | 0.97 | 1.00 |
| 10 | DMSO                       | 87.05  | 101.94 | 60.34  | 0.96 | 0.97 | 0.92 |
| 10 | DMSO                       | 91.45  | 89.76  | 120.52 | 0.97 | 1.05 | 1.07 |
| 10 | DMSO                       | 79.04  | 119.60 | 105.57 | 0.99 | 1.02 | 1.03 |
| 10 | IKK inhibitor (BMS-345541) | 0.00   | 0.00   | 0.00   | 1.48 | 1.33 | 1.21 |
| 11 | DMSO                       | 86.06  | 82.66  | 104.33 | 1.02 | 0.99 | 0.99 |
| 11 | DMSO                       | 114.22 | 137.53 | 121.07 | 1.02 | 1.01 | 0.99 |
| 11 | DMSO                       | 76.48  | 82.19  | 87.20  | 0.96 | 0.98 | 0.97 |
| 11 | DMSO                       | 106.61 | 127.34 | 94.85  | 1.00 | 1.04 | 1.03 |
| 11 | DMSO                       | 119.04 | 74.62  | 91.86  | 1.00 | 0.99 | 1.02 |
| 11 | IKK inhibitor (BMS-345541) | 18.74  | 75.09  | 54.69  | 0.94 | 1.06 | 0.96 |
